# Supplementary material
Source: publisher figshare collection journal article supplement (https://acs.figshare.com/ndownloader/files/8844070)
Supplement: Supplementary file 1 [file 8844070]

data_vv248

_audit_update_record               06-Apr-17

_chemical_name_common                   SL1869-B
_chemical_compound_source          ?
_chemical_absolute_configuration   ?

_exptl_crystal_description              block
_exptl_crystal_colour                   colourless
_exptl_crystal_size_max                 0.090 #?# in millimeters
_exptl_crystal_size_mid                 0.070 #?# in millimeters
_exptl_crystal_size_min                 0.040 #?# in millimeters
_exptl_crystal_density_method           'not measured'
_exptl_crystal_density_meas       ?
_exptl_special_details 
;
;

_audit_author_name                'P. Mayer' #?# X-ray operator
_audit_creation_date              ? #?# style: 18-Aug-1998

_diffrn_ambient_temperature             100.(2) #?# in K
_diffrn_source_type               'Bruker TXS'
_diffrn_source_power              2.5 #?# in kW
_diffrn_source_voltage            50 #?# in kV
_diffrn_source_current            50 #?# in mA
_diffrn_radiation_wavelength      0.71073
_diffrn_radiation_type            MoK\a
_diffrn_source                    'rotating anode (TXS)'
_diffrn_radiation_monochromator   'focusing mirrors'
_diffrn_radiation_collimation     ?
_diffrn_measurement_device        'fixed-chi three-circle diffractometer'
_diffrn_measurement_device_type   'Bruker D8 Venture TXS'
_diffrn_measurement_method        'mix of phi and omega scans'
_diffrn_measurement_details       ?
_diffrn_detector_area_resol_mean        7.4074

_diffrn_special_details            ?
_diffrn_orient_matrix_type        ?
_diffrn_orient_matrix_UB_11       ?
_diffrn_orient_matrix_UB_12       ?
_diffrn_orient_matrix_UB_13       ?
_diffrn_orient_matrix_UB_21       ?
_diffrn_orient_matrix_UB_22       ?
_diffrn_orient_matrix_UB_23       ?
_diffrn_orient_matrix_UB_31       ?
_diffrn_orient_matrix_UB_32       ?
_diffrn_orient_matrix_UB_33       ?

_cell_length_a                          8.8933(3)
_cell_length_b                          9.3676(4)
_cell_length_c                          11.1619(5)
_cell_angle_alpha                       95.392(2)
_cell_angle_beta                        104.2140(10)
_cell_angle_gamma                       90.3290(10)
_cell_volume                            897.03(6)
_cell_measurement_temperature           100.(2) #?# in K
_cell_measurement_reflns_used           4649
_cell_measurement_theta_min             2.7458
_cell_measurement_theta_max             26.2693
_cell_special_details             ?

_exptl_absorpt_coefficient_mu           0.073
_exptl_absorpt_correction_type          Multi-Scan
_exptl_absorpt_correction_T_min         0.9347
_exptl_absorpt_correction_T_max         0.9705
_shelx_estimated_absorpt_T_min    0.993
_shelx_estimated_absorpt_T_max    0.997
_exptl_absorpt_process_details 
;
SADABS-2016/2 - Bruker AXS area detector scaling and absorption correction
;

_diffrn_reflns_number             9511 #xl
_diffrn_reflns_av_R_equivalents   0.0313 #xl
_diffrn_reflns_av_unetI/netI      0.0421 #xl
_diffrn_reflns_limit_h_min        -11 #xl
_diffrn_reflns_limit_h_max        10 #xl
_diffrn_reflns_limit_k_min        -11 #xl
_diffrn_reflns_limit_k_max        11 #xl
_diffrn_reflns_limit_l_min        -13 #xl
_diffrn_reflns_limit_l_max        13 #xl
_diffrn_reflns_theta_min          3.171 #xl
_diffrn_reflns_theta_max          26.368 #xl
_diffrn_measured_fraction_theta_max   0.988 #xl
_diffrn_reflns_theta_full         25.242 #xl
_diffrn_measured_fraction_theta_full  0.991 #xl
_diffrn_reflns_Laue_measured_fraction_max    0.988 #xl
_diffrn_reflns_Laue_measured_fraction_full   0.991 #xl
_diffrn_reflns_point_group_measured_fraction_max   0.988 #xl
_diffrn_reflns_point_group_measured_fraction_full  0.991 #xl

_space_group_crystal_system             triclinic
_space_group_name_H-M_alt               'P -1'
_space_group_name_Hall                  '-P 1'
_space_group_IT_number            2

_shelx_space_group_comment 
;
The symmetry employed for this shelxl refinement is uniquely defined
by the following loop, which should always be used as a source of
symmetry information in preference to the above space-group names.
They are only intended as comments.
;

loop_
 _space_group_symop_operation_xyz
'x, y, z'
'-x, -y, -z'

loop_
 _atom_type_symbol
 _atom_type_description
 _atom_type_scat_dispersion_real
 _atom_type_scat_dispersion_imag
 _atom_type_scat_source
 'C'  'C'   0.0033   0.0016
 'International Tables Vol C Tables 4.2.6.8 and 6.1.1.4'
 'H'  'H'   0.0000   0.0000
 'International Tables Vol C Tables 4.2.6.8 and 6.1.1.4'
 'O'  'O'   0.0106   0.0060
 'International Tables Vol C Tables 4.2.6.8 and 6.1.1.4'

_reflns_number_total              3620 #xl
_reflns_number_gt                 2842 #xl
_reflns_threshold_expression      'I > 2\s(I)' #xl
_reflns_Friedel_coverage          0.000 #xl
_reflns_Friedel_fraction_max      . #xl
_reflns_Friedel_fraction_full     . #xl
_reflns_special_details 
;
 Reflections were merged by SHELXL according to the crystal
 class for the calculation of statistics and refinement.

 _reflns_Friedel_fraction is defined as the number of unique
 Friedel pairs measured divided by the number that would be
 possible theoretically, ignoring centric projections and
 systematic absences.
;

_refine_ls_structure_factor_coef  Fsqd #xl
_refine_ls_matrix_type            full #xl
_refine_ls_weighting_scheme       calc #xl
_refine_ls_weighting_details 
'w=1/[\s^2^(Fo^2^)+(0.0389P)^2^+0.4511P] where P=(Fo^2^+2Fc^2^)/3' #xl
_atom_sites_solution_primary      ?
_atom_sites_solution_secondary    ?
_atom_sites_solution_hydrogens          mixed
_refine_ls_hydrogen_treatment           mixed #?#
_refine_ls_extinction_method      none #xl
_refine_ls_extinction_coef        . #xl
_refine_ls_abs_structure_details  ? #xl
_refine_ls_abs_structure_Flack    ? #xl
_refine_ls_number_reflns          3620 #xl
_refine_ls_number_parameters      219 #xl
_refine_ls_number_restraints      0 #xl
_refine_ls_R_factor_all           0.0619 #xl
_refine_ls_R_factor_gt            0.0446 #xl
_refine_ls_wR_factor_ref          0.1102 #xl
_refine_ls_wR_factor_gt           0.0982 #xl
_refine_ls_goodness_of_fit_ref    1.026 #xl
_refine_ls_restrained_S_all       1.026 #xl
_refine_ls_shift/su_max           0.000 #xl
_refine_ls_shift/su_mean          0.000 #xl
_refine_diff_density_max    0.244 #xl
_refine_diff_density_min   -0.206 #xl
_refine_diff_density_rms    0.043 #xl

_refine_special_details 
;
H(C) constr
H(O) refall
;

_computing_data_collection     'APEX3 v2016.5-0, Bruker AXS (2016)'
_computing_cell_refinement              'SAINT V8.37A (Bruker AXS Inc., 2015)'
_computing_data_reduction               'SAINT V8.37A (Bruker AXS Inc., 2015)'
_computing_structure_solution           'XT, VERSION 2014/5'

_computing_structure_refinement         'SHELXL-2014/7 (Sheldrick, 2014)'

_computing_molecular_graphics           'shelXle (C.B. Huebschle, rev 786)'

_computing_publication_material  ?

loop_
 _atom_site_label
 _atom_site_type_symbol
 _atom_site_fract_x
 _atom_site_fract_y
 _atom_site_fract_z
 _atom_site_U_iso_or_equiv
 _atom_site_adp_type
 _atom_site_occupancy
 _atom_site_site_symmetry_order
 _atom_site_calc_flag
 _atom_site_refinement_flags_posn
 _atom_site_refinement_flags_adp
 _atom_site_refinement_flags_occupancy
 _atom_site_disorder_assembly
 _atom_site_disorder_group
O1 O 0.09491(13) 0.49350(13) 0.86123(10) 0.0229(3) Uani 1 1 d . . . . .
H1 H 0.000(3) 0.489(2) 0.868(2) 0.054(7) Uiso 1 1 d . . . . .
O2 O 0.79823(11) 0.49905(12) 0.88634(10) 0.0221(3) Uani 1 1 d . . . . .
H2 H 0.809(2) 0.508(2) 0.969(2) 0.049(6) Uiso 1 1 d . . . . .
C1 C 0.08749(17) 0.53567(18) 0.74027(14) 0.0202(3) Uani 1 1 d . . . . .
H1A H 0.0333 0.6275 0.7309 0.024 Uiso 1 1 calc R U . . .
H1B H 0.0265 0.4624 0.6771 0.024 Uiso 1 1 calc R U . . .
C2 C 0.24899(16) 0.55358(16) 0.71738(14) 0.0180(3) Uani 1 1 d . . . . .
C3 C 0.33398(18) 0.68476(17) 0.80594(15) 0.0230(4) Uani 1 1 d . . . . .
H3A H 0.3408 0.7670 0.7577 0.028 Uiso 1 1 calc R U . . .
H3B H 0.2758 0.7142 0.8688 0.028 Uiso 1 1 calc R U . . .
C4 C 0.49705(17) 0.63949(16) 0.86982(14) 0.0194(3) Uani 1 1 d . . . . .
H4A H 0.5750 0.7176 0.8764 0.023 Uiso 1 1 calc R U . . .
H4B H 0.5011 0.6113 0.9538 0.023 Uiso 1 1 calc R U . . .
C5 C 0.52320(16) 0.51230(15) 0.78359(13) 0.0156(3) Uani 1 1 d . . . . .
H5 H 0.5373 0.5500 0.7061 0.019 Uiso 1 1 calc R U . . .
C6 C 0.65765(16) 0.41648(16) 0.82857(14) 0.0177(3) Uani 1 1 d . . . . .
H6 H 0.6318 0.3544 0.8894 0.021 Uiso 1 1 calc R U . . .
C7 C 0.68103(17) 0.32305(17) 0.71666(14) 0.0207(3) Uani 1 1 d . . . . .
H7A H 0.7601 0.2513 0.7443 0.025 Uiso 1 1 calc R U . . .
H7B H 0.7194 0.3832 0.6614 0.025 Uiso 1 1 calc R U . . .
C8 C 0.52886(17) 0.24618(17) 0.64506(14) 0.0208(3) Uani 1 1 d . . . . .
H8 H 0.5382 0.1399 0.6318 0.025 Uiso 1 1 calc R U . . .
C9 C 0.41274(17) 0.30534(17) 0.54109(14) 0.0196(3) Uani 1 1 d . . . . .
H9 H 0.4371 0.4064 0.5285 0.023 Uiso 1 1 calc R U . . .
C10 C 0.33741(19) 0.21355(18) 0.42154(15) 0.0254(4) Uani 1 1 d . . . . .
H10A H 0.4186 0.1584 0.3926 0.030 Uiso 1 1 calc R U . . .
H10B H 0.2911 0.2772 0.3571 0.030 Uiso 1 1 calc R U . . .
C11 C 0.2116(2) 0.10907(19) 0.43534(16) 0.0300(4) Uani 1 1 d . . . . .
H11A H 0.1129 0.1598 0.4279 0.036 Uiso 1 1 calc R U . . .
H11B H 0.1953 0.0305 0.3673 0.036 Uiso 1 1 calc R U . . .
C12 C 0.2544(2) 0.04565(18) 0.55957(16) 0.0282(4) Uani 1 1 d . . . . .
H12A H 0.3554 -0.0013 0.5684 0.034 Uiso 1 1 calc R U . . .
H12B H 0.1755 -0.0289 0.5605 0.034 Uiso 1 1 calc R U . . .
C13 C 0.26546(18) 0.15939(16) 0.67175(15) 0.0213(3) Uani 1 1 d . . . . .
C14 C 0.36795(16) 0.29071(16) 0.66284(14) 0.0172(3) Uani 1 1 d . . . . .
C15 C 0.36608(16) 0.42841(15) 0.75017(13) 0.0147(3) Uani 1 1 d . . . . .
H15 H 0.3517 0.3960 0.8296 0.018 Uiso 1 1 calc R U . . .
C16 C 0.22119(18) 0.58622(18) 0.58215(15) 0.0246(4) Uani 1 1 d . . . . .
H16A H 0.3203 0.6117 0.5649 0.037 Uiso 1 1 calc R U . . .
H16B H 0.1510 0.6665 0.5677 0.037 Uiso 1 1 calc R U . . .
H16C H 0.1745 0.5014 0.5272 0.037 Uiso 1 1 calc R U . . .
C17 C 0.3381(2) 0.09217(18) 0.79200(16) 0.0298(4) Uani 1 1 d . . . . .
H17A H 0.3480 0.1644 0.8632 0.045 Uiso 1 1 calc R U . . .
H17B H 0.4410 0.0574 0.7892 0.045 Uiso 1 1 calc R U . . .
H17C H 0.2718 0.0118 0.8005 0.045 Uiso 1 1 calc R U . . .
C18 C 0.10028(19) 0.19864(19) 0.67637(17) 0.0294(4) Uani 1 1 d . . . . .
H18A H 0.1034 0.2624 0.7518 0.044 Uiso 1 1 calc R U . . .
H18B H 0.0396 0.1112 0.6770 0.044 Uiso 1 1 calc R U . . .
H18C H 0.0520 0.2475 0.6033 0.044 Uiso 1 1 calc R U . . .
C19 C 0.0874(2) 0.1193(2) 0.06107(17) 0.0352(4) Uani 1 1 d . . . . .
H19 H 0.1477 0.2012 0.1033 0.042 Uiso 1 1 calc R U . . .
C20 C 0.1467(2) -0.0152(2) 0.07249(18) 0.0382(5) Uani 1 1 d . . . . .
H20 H 0.2483 -0.0259 0.1226 0.046 Uiso 1 1 calc R U . . .
C21 C 0.0599(2) -0.1351(2) 0.01170(17) 0.0341(4) Uani 1 1 d . . . . .
H21 H 0.1014 -0.2279 0.0200 0.041 Uiso 1 1 calc R U . . .

loop_
 _atom_site_aniso_label
 _atom_site_aniso_U_11
 _atom_site_aniso_U_22
 _atom_site_aniso_U_33
 _atom_site_aniso_U_23
 _atom_site_aniso_U_13
 _atom_site_aniso_U_12
O1 0.0130(5) 0.0383(7) 0.0176(6) 0.0025(5) 0.0042(4) 0.0011(5)
O2 0.0112(5) 0.0358(7) 0.0173(6) -0.0009(5) 0.0011(4) -0.0050(4)
C1 0.0131(7) 0.0289(9) 0.0177(8) 0.0026(7) 0.0017(6) 0.0029(6)
C2 0.0144(7) 0.0206(8) 0.0186(8) 0.0023(6) 0.0034(6) 0.0019(6)
C3 0.0201(8) 0.0188(8) 0.0292(9) -0.0003(7) 0.0051(7) 0.0012(6)
C4 0.0172(7) 0.0193(8) 0.0204(8) -0.0009(6) 0.0034(6) -0.0040(6)
C5 0.0124(7) 0.0182(7) 0.0163(7) 0.0026(6) 0.0036(6) -0.0015(6)
C6 0.0099(7) 0.0243(8) 0.0185(8) 0.0019(6) 0.0028(6) -0.0022(6)
C7 0.0146(7) 0.0272(8) 0.0197(8) 0.0015(7) 0.0036(6) 0.0031(6)
C8 0.0190(8) 0.0200(8) 0.0227(8) -0.0010(6) 0.0050(6) 0.0005(6)
C9 0.0165(7) 0.0221(8) 0.0199(8) -0.0016(6) 0.0056(6) -0.0035(6)
C10 0.0244(9) 0.0297(9) 0.0209(8) -0.0051(7) 0.0062(7) -0.0047(7)
C11 0.0283(9) 0.0324(10) 0.0259(9) -0.0082(8) 0.0049(7) -0.0097(7)
C12 0.0290(9) 0.0219(8) 0.0330(10) -0.0038(7) 0.0089(7) -0.0079(7)
C13 0.0217(8) 0.0185(8) 0.0230(8) 0.0005(6) 0.0049(6) -0.0033(6)
C14 0.0143(7) 0.0178(7) 0.0182(8) 0.0001(6) 0.0026(6) -0.0012(6)
C15 0.0111(7) 0.0172(7) 0.0151(7) 0.0020(6) 0.0017(5) -0.0005(6)
C16 0.0208(8) 0.0304(9) 0.0238(9) 0.0097(7) 0.0051(7) 0.0067(7)
C17 0.0354(10) 0.0227(9) 0.0318(10) 0.0058(7) 0.0082(8) -0.0024(7)
C18 0.0216(8) 0.0277(9) 0.0385(10) -0.0026(8) 0.0088(7) -0.0086(7)
C19 0.0381(10) 0.0319(10) 0.0338(10) -0.0037(8) 0.0082(8) -0.0085(8)
C20 0.0236(9) 0.0484(12) 0.0400(11) 0.0089(9) 0.0015(8) 0.0050(8)
C21 0.0401(11) 0.0275(9) 0.0383(11) 0.0065(8) 0.0150(9) 0.0094(8)

loop_
 _geom_bond_atom_site_label_1
 _geom_bond_atom_site_label_2
 _geom_bond_distance
 _geom_bond_site_symmetry_2
 _geom_bond_publ_flag
O1 C1 1.4283(18) . ?
O1 H1 0.87(2) . ?
O2 C6 1.4410(17) . ?
O2 H2 0.90(2) . ?
C1 C2 1.530(2) . ?
C1 H1A 0.9900 . ?
C1 H1B 0.9900 . ?
C2 C16 1.529(2) . ?
C2 C3 1.566(2) . ?
C2 C15 1.5813(19) . ?
C3 C4 1.532(2) . ?
C3 H3A 0.9900 . ?
C3 H3B 0.9900 . ?
C4 C5 1.516(2) . ?
C4 H4A 0.9900 . ?
C4 H4B 0.9900 . ?
C5 C6 1.513(2) . ?
C5 C15 1.5445(19) . ?
C5 H5 1.0000 . ?
C6 C7 1.514(2) . ?
C6 H6 1.0000 . ?
C7 C8 1.529(2) . ?
C7 H7A 0.9900 . ?
C7 H7B 0.9900 . ?
C8 C9 1.503(2) . ?
C8 C14 1.547(2) . ?
C8 H8 1.0000 . ?
C9 C10 1.519(2) . ?
C9 C14 1.525(2) . ?
C9 H9 1.0000 . ?
C10 C11 1.528(2) . ?
C10 H10A 0.9900 . ?
C10 H10B 0.9900 . ?
C11 C12 1.523(2) . ?
C11 H11A 0.9900 . ?
C11 H11B 0.9900 . ?
C12 C13 1.549(2) . ?
C12 H12A 0.9900 . ?
C12 H12B 0.9900 . ?
C13 C18 1.528(2) . ?
C13 C17 1.534(2) . ?
C13 C14 1.552(2) . ?
C14 C15 1.545(2) . ?
C15 H15 1.0000 . ?
C16 H16A 0.9800 . ?
C16 H16B 0.9800 . ?
C16 H16C 0.9800 . ?
C17 H17A 0.9800 . ?
C17 H17B 0.9800 . ?
C17 H17C 0.9800 . ?
C18 H18A 0.9800 . ?
C18 H18B 0.9800 . ?
C18 H18C 0.9800 . ?
C19 C20 1.374(3) . ?
C19 C21 1.378(3) 2 ?
C19 H19 0.9500 . ?
C20 C21 1.381(3) . ?
C20 H20 0.9500 . ?
C21 C19 1.378(3) 2 ?
C21 H21 0.9500 . ?

loop_
 _geom_angle_atom_site_label_1
 _geom_angle_atom_site_label_2
 _geom_angle_atom_site_label_3
 _geom_angle
 _geom_angle_site_symmetry_1
 _geom_angle_site_symmetry_3
 _geom_angle_publ_flag
C1 O1 H1 106.1(15) . . ?
C6 O2 H2 108.7(14) . . ?
O1 C1 C2 111.92(12) . . ?
O1 C1 H1A 109.2 . . ?
C2 C1 H1A 109.2 . . ?
O1 C1 H1B 109.2 . . ?
C2 C1 H1B 109.2 . . ?
H1A C1 H1B 107.9 . . ?
C16 C2 C1 105.56(12) . . ?
C16 C2 C3 109.95(13) . . ?
C1 C2 C3 108.01(12) . . ?
C16 C2 C15 112.90(12) . . ?
C1 C2 C15 117.47(12) . . ?
C3 C2 C15 102.79(11) . . ?
C4 C3 C2 108.07(12) . . ?
C4 C3 H3A 110.1 . . ?
C2 C3 H3A 110.1 . . ?
C4 C3 H3B 110.1 . . ?
C2 C3 H3B 110.1 . . ?
H3A C3 H3B 108.4 . . ?
C5 C4 C3 102.69(12) . . ?
C5 C4 H4A 111.2 . . ?
C3 C4 H4A 111.2 . . ?
C5 C4 H4B 111.2 . . ?
C3 C4 H4B 111.2 . . ?
H4A C4 H4B 109.1 . . ?
C6 C5 C4 118.73(12) . . ?
C6 C5 C15 111.77(12) . . ?
C4 C5 C15 103.34(11) . . ?
C6 C5 H5 107.5 . . ?
C4 C5 H5 107.5 . . ?
C15 C5 H5 107.5 . . ?
O2 C6 C5 111.52(12) . . ?
O2 C6 C7 109.34(11) . . ?
C5 C6 C7 107.55(12) . . ?
O2 C6 H6 109.5 . . ?
C5 C6 H6 109.5 . . ?
C7 C6 H6 109.5 . . ?
C6 C7 C8 110.65(12) . . ?
C6 C7 H7A 109.5 . . ?
C8 C7 H7A 109.5 . . ?
C6 C7 H7B 109.5 . . ?
C8 C7 H7B 109.5 . . ?
H7A C7 H7B 108.1 . . ?
C9 C8 C7 124.47(13) . . ?
C9 C8 C14 59.97(9) . . ?
C7 C8 C14 123.49(13) . . ?
C9 C8 H8 113.0 . . ?
C7 C8 H8 113.0 . . ?
C14 C8 H8 113.0 . . ?
C8 C9 C10 121.92(14) . . ?
C8 C9 C14 61.43(10) . . ?
C10 C9 C14 122.53(13) . . ?
C8 C9 H9 113.7 . . ?
C10 C9 H9 113.7 . . ?
C14 C9 H9 113.7 . . ?
C9 C10 C11 113.49(13) . . ?
C9 C10 H10A 108.9 . . ?
C11 C10 H10A 108.9 . . ?
C9 C10 H10B 108.9 . . ?
C11 C10 H10B 108.9 . . ?
H10A C10 H10B 107.7 . . ?
C12 C11 C10 111.97(14) . . ?
C12 C11 H11A 109.2 . . ?
C10 C11 H11A 109.2 . . ?
C12 C11 H11B 109.2 . . ?
C10 C11 H11B 109.2 . . ?
H11A C11 H11B 107.9 . . ?
C11 C12 C13 112.93(14) . . ?
C11 C12 H12A 109.0 . . ?
C13 C12 H12A 109.0 . . ?
C11 C12 H12B 109.0 . . ?
C13 C12 H12B 109.0 . . ?
H12A C12 H12B 107.8 . . ?
C18 C13 C17 107.01(14) . . ?
C18 C13 C12 107.76(13) . . ?
C17 C13 C12 109.11(13) . . ?
C18 C13 C14 113.17(13) . . ?
C17 C13 C14 108.77(13) . . ?
C12 C13 C14 110.88(13) . . ?
C9 C14 C15 118.01(12) . . ?
C9 C14 C8 58.60(9) . . ?
C15 C14 C8 115.99(12) . . ?
C9 C14 C13 118.68(12) . . ?
C15 C14 C13 118.63(12) . . ?
C8 C14 C13 112.06(12) . . ?
C5 C15 C14 112.00(11) . . ?
C5 C15 C2 101.05(11) . . ?
C14 C15 C2 123.99(12) . . ?
C5 C15 H15 106.2 . . ?
C14 C15 H15 106.2 . . ?
C2 C15 H15 106.2 . . ?
C2 C16 H16A 109.5 . . ?
C2 C16 H16B 109.5 . . ?
H16A C16 H16B 109.5 . . ?
C2 C16 H16C 109.5 . . ?
H16A C16 H16C 109.5 . . ?
H16B C16 H16C 109.5 . . ?
C13 C17 H17A 109.5 . . ?
C13 C17 H17B 109.5 . . ?
H17A C17 H17B 109.5 . . ?
C13 C17 H17C 109.5 . . ?
H17A C17 H17C 109.5 . . ?
H17B C17 H17C 109.5 . . ?
C13 C18 H18A 109.5 . . ?
C13 C18 H18B 109.5 . . ?
H18A C18 H18B 109.5 . . ?
C13 C18 H18C 109.5 . . ?
H18A C18 H18C 109.5 . . ?
H18B C18 H18C 109.5 . . ?
C20 C19 C21 119.87(17) . 2 ?
C20 C19 H19 120.1 . . ?
C21 C19 H19 120.1 2 . ?
C19 C20 C21 120.53(17) . . ?
C19 C20 H20 119.7 . . ?
C21 C20 H20 119.7 . . ?
C19 C21 C20 119.59(17) 2 . ?
C19 C21 H21 120.2 2 . ?
C20 C21 H21 120.2 . . ?

loop_
 _geom_torsion_atom_site_label_1
 _geom_torsion_atom_site_label_2
 _geom_torsion_atom_site_label_3
 _geom_torsion_atom_site_label_4
 _geom_torsion
 _geom_torsion_site_symmetry_1
 _geom_torsion_site_symmetry_2
 _geom_torsion_site_symmetry_3
 _geom_torsion_site_symmetry_4
 _geom_torsion_publ_flag
O1 C1 C2 C16 175.48(13) . . . . ?
O1 C1 C2 C3 -66.95(16) . . . . ?
O1 C1 C2 C15 48.61(18) . . . . ?
C16 C2 C3 C4 -113.06(14) . . . . ?
C1 C2 C3 C4 132.24(13) . . . . ?
C15 C2 C3 C4 7.40(15) . . . . ?
C2 C3 C4 C5 21.10(15) . . . . ?
C3 C4 C5 C6 -166.72(13) . . . . ?
C3 C4 C5 C15 -42.33(14) . . . . ?
C4 C5 C6 O2 -46.42(17) . . . . ?
C15 C5 C6 O2 -166.57(11) . . . . ?
C4 C5 C6 C7 -166.29(12) . . . . ?
C15 C5 C6 C7 73.55(15) . . . . ?
O2 C6 C7 C8 -173.88(12) . . . . ?
C5 C6 C7 C8 -52.63(16) . . . . ?
C6 C7 C8 C9 90.06(17) . . . . ?
C6 C7 C8 C14 15.9(2) . . . . ?
C7 C8 C9 C10 135.43(15) . . . . ?
C14 C8 C9 C10 -112.47(15) . . . . ?
C7 C8 C9 C14 -112.10(16) . . . . ?
C8 C9 C10 C11 75.54(19) . . . . ?
C14 C9 C10 C11 1.3(2) . . . . ?
C9 C10 C11 C12 -38.1(2) . . . . ?
C10 C11 C12 C13 64.89(19) . . . . ?
C11 C12 C13 C18 74.72(17) . . . . ?
C11 C12 C13 C17 -169.43(14) . . . . ?
C11 C12 C13 C14 -49.65(18) . . . . ?
C8 C9 C14 C15 104.88(14) . . . . ?
C10 C9 C14 C15 -143.60(14) . . . . ?
C10 C9 C14 C8 111.52(17) . . . . ?
C8 C9 C14 C13 -99.65(14) . . . . ?
C10 C9 C14 C13 11.9(2) . . . . ?
C7 C8 C14 C9 113.67(17) . . . . ?
C9 C8 C14 C15 -108.34(14) . . . . ?
C7 C8 C14 C15 5.3(2) . . . . ?
C9 C8 C14 C13 111.06(14) . . . . ?
C7 C8 C14 C13 -135.27(15) . . . . ?
C18 C13 C14 C9 -109.05(16) . . . . ?
C17 C13 C14 C9 132.17(14) . . . . ?
C12 C13 C14 C9 12.18(19) . . . . ?
C18 C13 C14 C15 46.26(19) . . . . ?
C17 C13 C14 C15 -72.52(17) . . . . ?
C12 C13 C14 C15 167.50(13) . . . . ?
C18 C13 C14 C8 -174.27(13) . . . . ?
C17 C13 C14 C8 66.95(16) . . . . ?
C12 C13 C14 C8 -53.04(17) . . . . ?
C6 C5 C15 C14 -50.33(16) . . . . ?
C4 C5 C15 C14 -179.14(12) . . . . ?
C6 C5 C15 C2 175.80(11) . . . . ?
C4 C5 C15 C2 46.98(13) . . . . ?
C9 C14 C15 C5 -55.42(16) . . . . ?
C8 C14 C15 C5 11.18(17) . . . . ?
C13 C14 C15 C5 149.10(13) . . . . ?
C9 C14 C15 C2 66.02(18) . . . . ?
C8 C14 C15 C2 132.61(14) . . . . ?
C13 C14 C15 C2 -89.46(17) . . . . ?
C16 C2 C15 C5 86.03(14) . . . . ?
C1 C2 C15 C5 -150.75(13) . . . . ?
C3 C2 C15 C5 -32.37(13) . . . . ?
C16 C2 C15 C14 -40.25(19) . . . . ?
C1 C2 C15 C14 82.96(17) . . . . ?
C3 C2 C15 C14 -158.66(13) . . . . ?
C21 C19 C20 C21 -0.1(3) 2 . . . ?
C19 C20 C21 C19 0.1(3) . . . 2 ?

loop_
 _geom_hbond_atom_site_label_D
 _geom_hbond_atom_site_label_H
 _geom_hbond_atom_site_label_A
 _geom_hbond_distance_DH
 _geom_hbond_distance_HA
 _geom_hbond_distance_DA
 _geom_hbond_angle_DHA
 _geom_hbond_site_symmetry_A
O1 H1 O2  0.87(2) 1.86(2) 2.7211(15) 174(2) 1_455
O2 H2 O1  0.90(2) 1.88(2) 2.7375(15) 159(2) 2_667

_geom_special_details 
;

All esds (except the esd in the dihedral angle between two l.s. planes)
are estimated using the full covariance matrix.  The cell esds are taken
into account individually in the estimation of esds in distances, angles
and torsion angles; correlations between esds in cell parameters are only
used when they are defined by crystal symmetry.  An approximate (isotropic)
treatment of cell esds is used for estimating esds involving l.s. planes.
;

_audit_block_code                 C18H30O2_benzene_vv248_trauner
_audit_creation_method                  'APEX3 v2016.5-0'
_shelxl_version_number            ?
_chemical_name_systematic         ?
_chemical_formula_moiety          'C18 H30 O2, 0.5(C6 H6)'
_chemical_formula_sum                   'C21 H33 O2'
_chemical_formula_weight                317.47 #?# (Cohen, 1996)
_chemical_melting_point           ? #?# in K!

_cell_formula_units_Z                   2 #?# adjust to _chemical_formula_[]

_exptl_crystal_density_diffrn           1.175
_exptl_crystal_F_000                    350 #?# check!

_shelx_res_file 
;


    vv248_0m_a.res created by SHELXL-2014/7


TITL vv248_0m_a.res in P-1
REM Old TITL vv248_0m in P-1
REM SHELXT solution in P-1
REM R1 0.157,  Rweak 0.005,  Alpha 0.038,  Orientation as input
REM Formula found by SHELXT:  C21 O2
CELL  0.71073   8.8933   9.3676  11.1619   95.392  104.214   90.329
ZERR    2.000   0.0003   0.0004   0.0005    0.002    0.001    0.001
LATT  1
SFAC C H O
UNIT 42 66 4
TEMP -173.150
SIZE 0.04 0.07 0.09
L.S. 10
BOND $H
LIST 4
CONF
ACTA
SHEL 6.5 0.8
HTAB
EQIV $1 x-1, y, z
HTAB O1 O2_$1
EQIV $2 -x+1, -y+1, -z+2
HTAB O2 O1_$2
FMAP 2
PLAN -20
WGHT    0.038900    0.451100
FVAR       1.39188
O1    3    0.094910    0.493503    0.861234    11.00000    0.01296    0.03834 =
         0.01757    0.00255    0.00424    0.00111
H1    2   -0.000293    0.488762    0.867568    11.00000    0.05368
O2    3    0.798232    0.499053    0.886341    11.00000    0.01122    0.03584 =
         0.01735   -0.00093    0.00113   -0.00497
H2    2    0.809457    0.508392    0.968793    11.00000    0.04875
C1    1    0.087491    0.535669    0.740270    11.00000    0.01314    0.02888 =
         0.01768    0.00262    0.00168    0.00295
AFIX  23
H1A   2    0.033294    0.627495    0.730901    11.00000   -1.20000
H1B   2    0.026460    0.462387    0.677076    11.00000   -1.20000
AFIX   0
C2    1    0.248994    0.553576    0.717378    11.00000    0.01438    0.02063 =
         0.01861    0.00230    0.00338    0.00189
C3    1    0.333977    0.684763    0.805937    11.00000    0.02009    0.01875 =
         0.02922   -0.00027    0.00506    0.00118
AFIX  23
H3A   2    0.340776    0.767004    0.757726    11.00000   -1.20000
H3B   2    0.275751    0.714221    0.868788    11.00000   -1.20000
AFIX   0
C4    1    0.497054    0.639495    0.869822    11.00000    0.01716    0.01929 =
         0.02039   -0.00094    0.00340   -0.00396
AFIX  23
H4A   2    0.574986    0.717594    0.876392    11.00000   -1.20000
H4B   2    0.501058    0.611345    0.953823    11.00000   -1.20000
AFIX   0
C5    1    0.523201    0.512302    0.783592    11.00000    0.01238    0.01824 =
         0.01628    0.00261    0.00361   -0.00150
AFIX  13
H5    2    0.537319    0.550046    0.706062    11.00000   -1.20000
AFIX   0
C6    1    0.657647    0.416476    0.828570    11.00000    0.00985    0.02432 =
         0.01852    0.00186    0.00283   -0.00220
AFIX  13
H6    2    0.631812    0.354434    0.889354    11.00000   -1.20000
AFIX   0
C7    1    0.681027    0.323051    0.716661    11.00000    0.01463    0.02716 =
         0.01973    0.00151    0.00362    0.00307
AFIX  23
H7A   2    0.760147    0.251266    0.744256    11.00000   -1.20000
H7B   2    0.719369    0.383168    0.661409    11.00000   -1.20000
AFIX   0
C8    1    0.528859    0.246184    0.645060    11.00000    0.01901    0.01997 =
         0.02275   -0.00097    0.00503    0.00046
AFIX  13
H8    2    0.538243    0.139870    0.631810    11.00000   -1.20000
AFIX   0
C9    1    0.412739    0.305343    0.541085    11.00000    0.01652    0.02208 =
         0.01991   -0.00156    0.00556   -0.00346
AFIX  13
H9    2    0.437147    0.406360    0.528487    11.00000   -1.20000
AFIX   0
C10   1    0.337411    0.213550    0.421544    11.00000    0.02441    0.02970 =
         0.02091   -0.00505    0.00623   -0.00467
AFIX  23
H10A  2    0.418564    0.158380    0.392565    11.00000   -1.20000
H10B  2    0.291143    0.277197    0.357112    11.00000   -1.20000
AFIX   0
C11   1    0.211603    0.109071    0.435337    11.00000    0.02832    0.03244 =
         0.02595   -0.00824    0.00486   -0.00969
AFIX  23
H11A  2    0.112885    0.159833    0.427857    11.00000   -1.20000
H11B  2    0.195306    0.030463    0.367266    11.00000   -1.20000
AFIX   0
C12   1    0.254388    0.045646    0.559572    11.00000    0.02899    0.02188 =
         0.03298   -0.00381    0.00890   -0.00787
AFIX  23
H12A  2    0.355445   -0.001299    0.568354    11.00000   -1.20000
H12B  2    0.175452   -0.028927    0.560480    11.00000   -1.20000
AFIX   0
C13   1    0.265463    0.159394    0.671751    11.00000    0.02167    0.01848 =
         0.02295    0.00046    0.00493   -0.00334
C14   1    0.367951    0.290712    0.662842    11.00000    0.01434    0.01780 =
         0.01822    0.00011    0.00259   -0.00118
C15   1    0.366081    0.428409    0.750171    11.00000    0.01111    0.01722 =
         0.01512    0.00199    0.00173   -0.00046
AFIX  13
H15   2    0.351704    0.396037    0.829597    11.00000   -1.20000
AFIX   0
C16   1    0.221186    0.586216    0.582147    11.00000    0.02075    0.03040 =
         0.02384    0.00966    0.00508    0.00674
AFIX 137
H16A  2    0.320267    0.611693    0.564857    11.00000   -1.50000
H16B  2    0.150976    0.666517    0.567742    11.00000   -1.50000
H16C  2    0.174489    0.501359    0.527158    11.00000   -1.50000
AFIX   0
C17   1    0.338132    0.092175    0.792000    11.00000    0.03545    0.02267 =
         0.03182    0.00575    0.00818   -0.00245
AFIX 137
H17A  2    0.348001    0.164409    0.863152    11.00000   -1.50000
H17B  2    0.441039    0.057403    0.789158    11.00000   -1.50000
H17C  2    0.271781    0.011770    0.800511    11.00000   -1.50000
AFIX   0
C18   1    0.100283    0.198639    0.676371    11.00000    0.02157    0.02770 =
         0.03847   -0.00264    0.00880   -0.00858
AFIX 137
H18A  2    0.103353    0.262388    0.751809    11.00000   -1.50000
H18B  2    0.039602    0.111177    0.677001    11.00000   -1.50000
H18C  2    0.051972    0.247517    0.603265    11.00000   -1.50000
AFIX   0
C19   1    0.087351    0.119282    0.061067    11.00000    0.03810    0.03188 =
         0.03379   -0.00370    0.00817   -0.00850
AFIX  43
H19   2    0.147701    0.201240    0.103263    11.00000   -1.20000
AFIX   0
C20   1    0.146705   -0.015241    0.072486    11.00000    0.02361    0.04838 =
         0.04004    0.00886    0.00146    0.00502
AFIX  43
H20   2    0.248300   -0.025885    0.122601    11.00000   -1.20000
AFIX   0
C21   1    0.059877   -0.135094    0.011704    11.00000    0.04005    0.02749 =
         0.03832    0.00646    0.01498    0.00945
AFIX  43
H21   2    0.101391   -0.227887    0.020008    11.00000   -1.20000
REM #####
AFIX   0
HKLF 4

REM  vv248_0m_a.res in P-1
REM R1 =  0.0446 for    2842 Fo > 4sig(Fo)  and  0.0619 for all    3620 data
REM    219 parameters refined using      0 restraints

END

WGHT      0.0389      0.4511

REM Instructions for potential hydrogen bonds
HTAB O1 O2_$1
HTAB O2 O1_$2

REM Highest difference peak  0.244,  deepest hole -0.206,  1-sigma level  0.043
Q1    1   0.1812  0.5433  0.7427  11.00000  0.05    0.24
Q2    1   0.2907  0.0361  0.4818  11.00000  0.05    0.23
Q3    1   0.5859  0.4627  0.8064  11.00000  0.05    0.21
Q4    1   0.6608  0.3783  0.7655  11.00000  0.05    0.21
Q5    1   0.3082  0.2283  0.6665  11.00000  0.05    0.21
Q6    1   0.3574  0.3557  0.7093  11.00000  0.05    0.20
Q7    1   0.2781  0.6183  0.7579  11.00000  0.05    0.19
Q8    1   0.2298  0.5730  0.6586  11.00000  0.05    0.18
Q9    1   0.3410  0.3193  0.5858  11.00000  0.05    0.18
Q10   1   0.4470  0.4662  0.7665  11.00000  0.05    0.18
Q11   1   0.4884  0.2660  0.5760  11.00000  0.05    0.17
Q12   1   0.2971  0.4900  0.7357  11.00000  0.05    0.16
Q13   1   0.5209  0.5797  0.8283  11.00000  0.05    0.15
Q14   1   0.4483  0.2716  0.6835  11.00000  0.05    0.15
Q15   1   0.3903  0.2467  0.4844  11.00000  0.05    0.15
Q16   1  -0.1026  0.4007  0.6408  11.00000  0.05    0.15
Q17   1   0.0729  0.2830  0.7396  11.00000  0.05    0.15
Q18   1   0.0974  0.2015  0.7668  11.00000  0.05    0.14
Q19   1   0.6951  0.4134  0.6701  11.00000  0.05    0.14
Q20   1  -0.0122  0.5040  0.6829  11.00000  0.05    0.14
;
_shelx_res_checksum                     67654
_shelx_hkl_file
;
  -1   0   0    0.00    0.30
   1   0   0    0.40    0.20
  -2   0   0 1700.83   37.50
  -2   0   0 1641.84   34.40
   2   0   0 1644.14   34.50
   2   0   0 1674.63   37.50
  -3   0   0   65.09    5.00
  -3   0   0   63.99    3.40
   3   0   0   53.49    4.70
   3   0   0   65.29    3.50
  -4   0   0  162.78    6.50
  -4   0   0  168.38    9.90
   4   0   0  179.08    6.90
   4   0   0  156.38    9.70
  -5   0   0  955.30   29.50
  -5   0   0  912.21   22.80
   5   0   0  946.91   23.10
   5   0   0  950.90   29.80
  -6   0   0    6.40    1.90
  -6   0   0    8.40    3.80
   6   0   0    7.70    2.10
   6   0   0    4.70    3.60
  -7   0   0 1849.61   52.69
  -7   0   0 1820.12   40.50
   7   0   0 1803.32   40.60
  -8   0   0   35.30    3.20
  -8   0   0   31.80    8.20
   8   0   0   44.60    3.00
  -9   0   0  230.98   17.00
 -10   0   0    0.80    4.80
 -10   1   0  199.48   17.50
  -9   1   0   97.59   13.40
  -8   1   0    3.90    4.20
  -7   1   0   34.10    6.80
   6  -1   0    5.70    3.00
  -6   1   0    9.30    4.50
   5  -1   0   17.40    4.60
  -5   1   0   19.40    4.90
   4  -1   0   20.80    4.40
  -4   1   0   25.10    5.10
   3  -1   0  953.10   26.40
  -3   1   0  953.90   26.50
   2  -1   0  530.15   15.50
  -2   1   0  495.45   15.30
   1  -1   0 3729.03  115.79
   0  -1   0   -0.20    0.80
   0   1   0    0.30    0.20
  -1  -1   0   83.59    4.20
   1   1   0   74.89    4.20
   1   1   0   79.99    3.50
  -2  -1   0   91.79    4.90
  -2  -1   0   87.29    5.00
   2   1   0   97.99    5.10
   2   1   0   95.09    5.20
  -3  -1   0  301.17   10.80
  -3  -1   0  304.37   11.60
   3   1   0  303.17   11.70
   3   1   0  317.77   11.10
  -4  -1   0    3.00    2.80
  -4  -1   0   11.70    3.00
   4   1   0    7.40    2.70
   4   1   0   12.30    3.50
  -5  -1   0   42.00    7.30
  -5  -1   0   38.70    4.90
   5   1   0   39.80    5.10
   5   1   0   34.60    5.80
  -6  -1   0  169.38   11.50
  -6  -1   0  170.28    9.00
   6   1   0  177.68   11.90
   6   1   0  164.58    9.20
  -7  -1   0 2059.89   56.69
  -7  -1   0 2055.69   49.10
  -8  -1   0   31.50    7.50
  -8  -1   0   26.50    4.60
   8   1   0   25.30    4.90
  -9  -1   0   33.50    8.10
  -9  -1   0   31.50    4.90
   9   1   0   32.80    4.80
 -10  -1   0   47.10   10.30
 -10   2   0  139.39   15.50
  -9   2   0   -3.00    3.20
  -8   2   0  177.28   14.70
  -7   2   0  108.99   11.30
  -6   2   0  241.88   14.90
   5  -2   0   44.60    7.10
  -5   2   0   62.39    8.20
   4  -2   0 1575.04   42.70
  -4   2   0 1646.44   43.10
   3  -2   0 6122.89  118.79
  -3   2   0 5040.40  109.19
   2  -2   0  543.95   13.60
   2  -2   0  545.45   16.90
  -2   2   0  547.25   13.80
  -2   2   0  521.35   16.60
   0  -2   0 1965.80   43.10
   0  -2   0 1832.32   40.90
   0   2   0 1976.90   43.30
   0   2   0 1948.61   41.20
  -1  -2   0 1505.05   35.10
  -1  -2   0 1405.46   31.80
   1   2   0 1463.75   31.90
   1   2   0 1478.65   35.20
  -2  -2   0  920.61   27.90
  -2  -2   0 1002.10   23.80
   2   2   0  986.90   26.30
   2   2   0  953.00   23.50
  -3  -2   0   29.60    4.60
  -3  -2   0   34.90    4.00
   3   2   0   29.50    4.60
   3   2   0   31.60    4.80
  -4  -2   0  130.39    8.20
  -4  -2   0  134.49    8.40
   4   2   0  122.19    8.00
   4   2   0  124.69    8.60
  -5  -2   0   48.50    6.60
  -5  -2   0   47.20    6.20
   5   2   0   41.90    6.10
   5   2   0   38.80    5.80
  -6  -2   0   31.50    5.60
  -6  -2   0   25.10    5.60
   6   2   0   21.20    5.20
   6   2   0   19.80    4.90
  -7  -2   0  136.59    9.80
  -7  -2   0  132.79   11.00
   7   2   0  112.29   10.90
  -8  -2   0  470.85   19.40
  -8  -2   0  497.05   23.30
   8   2   0  491.85   20.00
  -9  -2   0   22.20    5.90
  -9  -2   0   26.80    7.00
   9   2   0   27.50    5.90
 -10  -2   0   48.20    9.70
  10   2   0   60.49    8.90
 -10   3   0  205.18   17.90
  -9   3   0    7.40    5.60
  -8   3   0    9.50    5.80
  -6   3   0  317.37   17.80
   5  -3   0  167.58   11.70
  -5   3   0  155.78   11.30
   4  -3   0  194.88   12.00
   4  -3   0  211.08    6.40
  -4   3   0  208.68   12.10
   3  -3   0  429.26   12.40
   3  -3   0  414.96   16.80
  -3   3   0  435.56   12.80
  -3   3   0  412.16   16.80
   2  -3   0  508.15   15.00
   2  -3   0  497.15   16.80
  -2   3   0  475.05   16.60
  -2   3   0  512.05   15.30
   1  -3   0 4196.88   90.79
  -1   3   0 4434.96   91.39
   0  -3   0 1779.72   39.30
   0  -3   0 1665.43   41.30
   0  -3   0 1707.93   38.70
   0   3   0 1746.63   42.00
   0   3   0 1715.83   39.00
  -1  -3   0 2551.14   59.39
  -1  -3   0 2584.04   55.09
  -1  -3   0 2658.83   55.39
   1   3   0 2513.65   59.49
   1   3   0 2584.24   55.29
  -2  -3   0    2.20    1.90
  -2  -3   0    0.20    1.70
   2   3   0   -1.50    2.30
   2   3   0    0.00    1.30
  -3  -3   0  753.92   24.40
  -3  -3   0  712.23   21.00
   3   3   0  763.82   24.90
   3   3   0  733.03   21.00
  -4  -3   0    2.10    2.50
  -4  -3   0    3.00    2.30
   4   3   0    2.80    3.20
   4   3   0    0.70    2.10
  -5  -3   0   28.80    5.30
  -5  -3   0   30.20    5.40
   5   3   0   25.20    5.10
   5   3   0   38.40    6.60
  -6  -3   0  837.72   28.10
  -6  -3   0  805.42   28.00
   6   3   0  813.62   28.80
  -7  -3   0  123.79   10.60
  -7  -3   0  110.99    9.70
   7   3   0  132.49   12.90
   7   3   0   93.49   10.20
  -8  -3   0   35.20    7.80
  -8  -3   0   36.30    7.50
   8   3   0   39.60    7.70
  -9  -3   0  102.09   13.60
  -9  -3   0  137.79   12.80
   9   3   0  102.09   10.70
 -10  -3   0   12.60    6.10
  10   3   0    2.60    4.20
 -10   4   0   22.50    8.40
  -9   4   0    4.70    5.20
  -8   4   0    0.20    3.00
  -7   4   0   72.59   11.40
  -6   4   0  130.29   12.00
   5  -4   0  312.37    8.90
  -5   4   0  329.37   11.40
  -5   4   0  314.87   17.30
   4  -4   0  501.15   14.90
   4  -4   0  524.45   21.10
  -4   4   0  488.45   20.50
  -4   4   0  504.45   15.30
   3  -4   0 1230.78   35.40
  -3   4   0 1211.78   31.50
  -3   4   0 1259.07   35.60
   2  -4   0   26.10    4.80
   2  -4   0   28.00    4.40
  -2   4   0   25.50    4.90
  -2   4   0   37.00    5.30
   1  -4   0  169.58    8.70
   1  -4   0  166.28    9.50
  -1   4   0  162.68    9.80
  -1   4   0  169.58    9.10
   0  -4   0  556.14   17.10
   0  -4   0  531.65   19.00
   0  -4   0  520.65   16.40
   0   4   0  506.85   19.30
   0   4   0  506.15   16.50
  -1  -4   0   -0.60    1.80
  -1  -4   0   -0.30    1.80
  -1  -4   0    0.70    3.00
   1   4   0   -4.20    2.60
  -2  -4   0    6.10    3.50
  -2  -4   0    3.90    2.20
  -2  -4   0    0.40    2.00
   2   4   0    1.40    1.70
  -3  -4   0  291.17   11.80
  -3  -4   0  266.97   14.40
   3   4   0  266.37   11.20
   3   4   0  272.27   14.70
  -4  -4   0   40.60    5.50
   4   4   0   43.90    4.90
   4   4   0   37.90    7.00
  -5  -4   0  353.16   17.80
  -5  -4   0  339.67   17.50
   5   4   0  344.07   18.30
   5   4   0  322.47   14.80
  -6  -4   0  229.68   15.40
  -6  -4   0  265.67   14.20
   6   4   0  265.97   16.70
  -7  -4   0  205.78   13.70
   7   4   0  198.88   14.60
   7   4   0  179.38   13.20
  -8  -4   0    2.20    3.80
   8   4   0   -3.60    4.10
  -9  -4   0    4.80    4.30
   9   4   0    2.10    4.70
 -10  -4   0   10.30    6.40
  10   4   0   -7.30    5.60
  -9   5   0    6.30    5.20
  -8   5   0  159.58   14.70
  -7   5   0  335.57   20.50
  -6   5   0  133.69   12.70
   5  -5   0  127.89    6.90
  -5   5   0  132.79    7.40
  -5   5   0  149.59   12.10
   4  -5   0  219.58   10.40
  -4   5   0  231.88   14.20
  -4   5   0  238.38   11.20
   3  -5   0   77.49    7.90
   3  -5   0   70.89    6.40
  -3   5   0   80.39    7.10
  -3   5   0   69.39    7.70
   2  -5   0  681.73   23.10
   2  -5   0  674.43   22.60
  -2   5   0  668.13   23.30
  -2   5   0  699.43   23.60
   1  -5   0   61.09    6.30
   1  -5   0   58.49    5.80
  -1   5   0   54.09    5.80
  -1   5   0   47.70    7.00
   0  -5   0  912.61   26.10
   0  -5   0  922.01   26.80
   0  -5   0  921.71   29.70
   0   5   0  915.11   30.20
   0   5   0  925.91   26.40
  -1  -5   0   -0.90    1.70
  -1  -5   0   -2.10    2.80
  -1  -5   0   -2.50    1.50
   1   5   0   -0.70    2.20
  -2  -5   0   96.19    6.40
  -2  -5   0  109.69    9.30
  -2  -5   0   98.19    6.70
   2   5   0  101.09    9.50
   2   5   0   99.09    6.70
  -3  -5   0   39.50    6.90
  -3  -5   0   40.30    4.70
  -3  -5   0   47.50    4.80
   3   5   0   45.80    8.00
   3   5   0   44.30    5.60
  -4  -5   0   61.69    9.00
  -4  -5   0   54.79    6.00
   4   5   0   48.90    5.60
   4   5   0   64.39    9.30
  -5  -5   0   50.89    7.00
   5   5   0   40.50    6.20
   5   5   0   47.60    9.20
  -6  -5   0   -3.20    2.50
   6   5   0    0.60    3.80
   6   5   0    0.70    3.20
  -7  -5   0   -3.50    2.60
   7   5   0   -5.70    3.50
  -8  -5   0  145.79   11.90
   8   5   0  141.39   14.10
  -9  -5   0    8.30    5.60
   9   5   0   10.30    6.50
  -9   6   0   72.19   12.20
  -8   6   0   75.39   12.20
  -7   6   0   50.99   10.10
   6  -6   0   43.30    4.30
  -6   6   0   35.70    4.30
  -6   6   0   42.40    8.50
   5  -6   0   24.00    4.20
  -5   6   0   17.60    4.30
  -5   6   0   34.80    7.50
   4  -6   0  212.88   11.40
  -4   6   0  189.38   13.60
  -4   6   0  196.68   11.80
   3  -6   0  613.74   22.20
   3  -6   0  581.84   23.50
  -3   6   0  617.64   26.60
  -3   6   0  583.94   23.60
   2  -6   0  175.38   11.40
   2  -6   0  166.88   10.80
  -2   6   0  174.08   12.00
  -2   6   0  177.88   11.50
   1  -6   0  261.57   13.20
  -1   6   0  275.47   13.70
  -1   6   0  254.07   15.00
   0  -6   0  247.08   12.00
   0  -6   0  274.37   13.20
   0  -6   0  247.18   14.70
   0   6   0  256.77   12.60
   0   6   0  248.28   15.10
  -1  -6   0  115.89    8.10
  -1  -6   0  103.69    7.40
  -1  -6   0  109.89    9.90
   1   6   0  108.99   10.30
  -2  -6   0   16.80    3.70
  -2  -6   0   18.30    3.70
   2   6   0   18.80    5.60
  -3  -6   0   12.30    3.50
  -3  -6   0    8.20    3.30
   3   6   0   10.80    3.10
   3   6   0   14.50    5.50
  -4  -6   0  245.38   12.70
  -4  -6   0  250.37   12.30
   4   6   0  239.48   12.50
   4   6   0  257.97   17.50
  -5  -6   0  196.48   11.90
   5   6   0  183.68   11.40
   5   6   0  197.08   15.70
  -6  -6   0    4.20    4.10
   6   6   0   -2.40    4.90
   6   6   0    6.10    3.50
  -7  -6   0   66.09    9.00
   7   6   0   53.29   10.50
  -8  -6   0    0.70    3.90
   8   6   0   -2.80    5.30
  -9  -6   0   18.50    6.10
   9   6   0   21.60    7.80
  -8   7   0   37.30    9.80
  -7   7   0    4.30    5.10
   6  -7   0  112.19    7.90
  -6   7   0  118.49   12.80
  -6   7   0  127.99    9.00
   5  -7   0  667.93   23.40
  -5   7   0  697.33   30.00
   4  -7   0  331.47   16.40
  -4   7   0  364.16   17.70
  -4   7   0  350.96   19.60
   3  -7   0  362.96   17.80
  -3   7   0  358.76   18.80
  -3   7   0  369.46   18.80
   2  -7   0  224.18   13.90
   2  -7   0  211.28   13.80
  -2   7   0  207.58   14.60
  -2   7   0  203.58   13.30
   1  -7   0   49.20    7.20
   1  -7   0   48.90    7.60
  -1   7   0   40.20    7.80
  -1   7   0   62.39    7.90
   0  -7   0   29.70    5.80
   0  -7   0   21.70    4.70
   0   7   0   20.20    6.40
   0   7   0   20.10    4.70
  -1  -7   0   -2.70    2.30
  -1  -7   0   -0.70    2.10
   1   7   0    5.80    4.50
  -2  -7   0   29.80    5.70
  -2  -7   0   36.30    5.80
   2   7   0   25.70    6.80
  -3  -7   0  260.57   13.00
  -3  -7   0  234.48   12.20
   3   7   0  232.58   17.50
  -4  -7   0    8.40    3.90
  -4  -7   0    8.30    3.40
   4   7   0    6.00    5.70
   4   7   0    6.90    3.40
  -5  -7   0    2.30    3.30
  -5  -7   0    3.30    3.80
   5   7   0   -4.00    3.00
  -6  -7   0   11.30    4.70
   6   7   0    9.50    4.80
   6   7   0    6.70    4.40
  -7  -7   0  112.39   10.60
   7   7   0  124.99   16.30
  -8  -7   0   -5.50    4.10
   8   7   0  -16.70    5.20
  -7   8   0  215.38   18.70
  -7   8   0  215.78   11.20
   6  -8   0    0.10    3.20
  -6   8   0   -2.60    2.80
  -6   8   0    2.70    4.40
   5  -8   0   -0.80    3.10
  -5   8   0   11.40    5.00
  -5   8   0   -4.00    3.70
   4  -8   0  131.99   11.50
  -4   8   0  130.39   12.10
  -4   8   0  120.69   12.40
  -3   8   0  758.82   30.10
  -3   8   0  704.93   29.50
  -2   8   0  150.58   12.00
  -2   8   0  145.49   13.10
   1  -8   0  111.29   10.20
  -1   8   0  107.59    9.80
  -1   8   0  111.29   12.50
   0  -8   0    4.70    3.60
   0  -8   0    4.50    3.40
   0   8   0    6.20    3.80
   0   8   0    7.80    5.50
  -1  -8   0  119.09    9.40
  -1  -8   0  133.19   10.50
  -2  -8   0  587.04   22.40
   2   8   0  567.44   29.20
  -3  -8   0  503.25   20.50
   3   8   0  545.55   29.30
  -4  -8   0  147.39   10.90
   4   8   0  164.08   16.60
  -5  -8   0  161.38   11.70
  -5  -8   0  143.69   10.70
   5   8   0  138.09   10.50
   5   8   0  126.29   14.30
  -6  -8   0   18.90    6.60
  -6  -8   0   29.60    6.80
   6   8   0   38.80    6.70
   6   8   0   33.40    8.90
  -7  -8   0   29.60    7.30
   7   8   0   22.50    9.10
  -7   9   0   -0.50    5.60
  -6   9   0    9.30    5.90
  -5   9   0   -5.40    4.10
  -5   9   0    1.70    4.60
  -4   9   0   34.20    8.20
  -4   9   0   23.20    6.40
  -3   9   0   86.79   12.10
  -3   9   0   78.29   11.90
   2  -9   0    2.20    4.70
  -2   9   0    3.10    3.90
  -2   9   0   -1.00    5.10
   1  -9   0    2.20    4.40
  -1   9   0    2.30    4.10
  -1   9   0   -4.80    4.00
   0  -9   0   16.80    5.60
   0   9   0   35.10    9.10
  -1  -9   0   14.00    5.50
   1   9   0    6.30    6.60
  -2  -9   0    0.10    3.90
  -2  -9   0    1.30    3.70
   2   9   0    0.20    5.20
  -3  -9   0  669.93   24.40
   3   9   0  644.84   33.70
  -4  -9   0   96.99    9.80
  -4  -9   0   96.29    9.90
   4   9   0  102.89   15.50
  -5  -9   0   28.00    6.50
   5   9   0   30.30   10.20
  -6  -9   0   76.39    9.60
   6   9   0   40.90   10.60
  -5  10   0   40.10   10.80
  -4  10   0  388.46   24.00
  -4  10   0  417.46   24.30
   3 -10   0   42.40    9.60
  -3  10   0   43.90   10.20
  -3  10   0   56.29    9.90
   2 -10   0   -3.70    4.10
  -2  10   0   -0.10    5.20
  -2  10   0    0.80    3.90
   1 -10   0   56.99   10.40
  -1  10   0   45.00   10.50
  -1  10   0   55.99    8.90
   0 -10   0  121.39   11.60
   0  10   0   92.29   14.90
  -1 -10   0   41.00    7.90
   1  10   0   43.30   11.00
  -2 -10   0   56.09    8.90
   2  10   0   48.90   11.10
  -3 -10   0   -5.60    3.70
   3  10   0    6.20    7.60
  -4 -10   0  209.78   14.10
   4  10   0  234.48   22.40
  -5 -10   0   16.10    6.70
   5  10   0    2.30    4.70
   3 -11   0   -8.40    5.50
  -3  11   0   12.30    5.90
  -3  11   0    0.90    5.20
   2 -11   0   -6.20    5.60
  -2  11   0   12.60    5.00
  -2  11   0   -4.90    6.40
   1 -11   0   33.50    8.70
  -1  11   0   34.50    9.90
   0 -11   0  162.68   14.30
  -1 -11   0   22.50    8.70
   1  11   0    9.80    8.10
  -2 -11   0   29.00    7.70
   2  11   0   19.10    8.70
  -3 -11   1   -9.80    5.10
   2  11  -1  -10.00    5.80
  -2 -11   1   -3.20    5.00
  -1 -11   1  194.68   14.20
   0  11  -1   52.89   11.90
  -1  11  -1  144.79   16.50
  -1  11  -1  127.29   12.70
   1 -11   1  134.59   13.00
  -2  11  -1    0.70    6.20
  -2  11  -1    0.70    5.00
   2 -11   1   -7.70    4.60
  -3  11  -1   -5.80    5.10
  -3  11  -1   -8.40    5.40
   3 -11   1    0.20    4.90
   5  10  -1    3.70    7.80
  -5 -10   1   11.40    6.60
   4  10  -1    8.60    5.90
  -4 -10   1   -1.00    4.20
   3  10  -1   55.29   11.40
  -3 -10   1   87.39    9.40
   2  10  -1   89.59   14.90
  -2 -10   1   96.69   10.70
  -2 -10   1   88.89    9.30
   1  10  -1  220.28   19.70
  -1 -10   1  160.38   12.50
   0  10  -1    0.70    4.90
   0 -10   1   11.40    4.90
  -1  10  -1    5.40    5.90
  -1  10  -1    3.80    3.60
   1 -10   1    3.20    4.50
  -2  10  -1  135.39   14.70
  -2  10  -1  150.58   13.40
   2 -10   1  138.59   13.30
  -3  10  -1   59.29    9.90
  -3  10  -1   28.60    8.90
  -4  10  -1   22.10    8.40
  -4  10  -1   26.10    7.30
  -5  10  -1    5.50    6.00
  -5  10  -1   20.40    8.00
   6   9  -1   -2.00    6.90
  -6  -9   1   -4.30    4.60
   5   9  -1   17.80    8.90
  -5  -9   1   13.00    5.10
   4   9  -1   30.70    9.00
  -4  -9   1   33.20    5.70
  -4  -9   1   26.60    5.50
  -3  -9   1   -1.00    3.40
  -3  -9   1    4.00    3.40
   2   9  -1  151.48   16.10
  -2  -9   1  198.08   12.20
   1   9  -1   12.10    5.40
  -1  -9   1   13.10    5.20
  -1  -9   1   16.90    5.00
   0   9  -1   83.99   13.00
   0   9  -1  103.49   10.00
   0  -9   1  112.29   10.10
   0  -9   1  117.99   12.40
  -1   9  -1   24.70    6.10
  -1   9  -1   21.90    6.90
   1  -9   1   33.70    7.10
  -2   9  -1   13.50    5.60
  -3   9  -1  238.98   16.70
  -3   9  -1  244.98   17.60
  -4   9  -1  180.58   15.30
  -4   9  -1  185.58   14.90
  -5   9  -1   86.19   10.80
  -5   9  -1   74.29   11.70
   7   8  -1    4.90    5.10
  -7  -8   1   10.70    4.70
   6   8  -1   69.69   13.80
   6   8  -1   54.29    7.10
  -6  -8   1   73.39    7.80
  -6  -8   1   70.79    8.40
   5   8  -1   35.40    9.70
  -5  -8   1   50.19    5.70
   4   8  -1   51.99   11.00
  -4  -8   1   62.89    6.40
  -4  -8   1   51.79    6.80
   3   8  -1    1.50    3.30
  -3  -8   1    1.40    2.70
  -3  -8   1    2.20    2.60
   2   8  -1   -0.90    2.80
  -2  -8   1    1.90    2.80
  -2  -8   1    4.10    3.40
   1   8  -1 1041.60   45.60
  -1  -8   1 1084.09   32.40
  -1  -8   1 1030.50   31.30
   0   8  -1   26.70    5.70
   0   8  -1   28.60    8.10
   0  -8   1   33.50    5.90
   0  -8   1   30.20    6.40
  -1   8  -1   21.80    6.40
  -1   8  -1   30.30    6.70
   1  -8   1   22.20    5.70
   1  -8   1   23.80    5.60
  -2   8  -1   29.20    6.70
  -2   8  -1   40.10    8.20
  -3   8  -1   86.99    9.80
  -3   8  -1   75.29   10.40
  -4   8  -1    5.40    4.40
  -4   8  -1    4.10    4.30
   4  -8   1    0.80    3.00
  -5   8  -1    5.70    4.90
  -5   8  -1    9.60    5.50
   5  -8   1   14.50    4.70
  -6   8  -1   42.20    9.20
   6  -8   1   49.60    6.70
  -7   8  -1   31.90    8.60
   8   7  -1    1.60    6.00
  -8  -7   1   -1.60    4.10
   7   7  -1   85.59   14.00
   7   7  -1   62.79    8.40
  -7  -7   1   91.09    8.80
   6   7  -1    6.00    5.90
   6   7  -1   14.30    4.40
  -6  -7   1   16.00    4.40
  -6  -7   1   13.80    4.50
   5   7  -1  108.59   14.80
   5   7  -1  110.69    8.10
  -5  -7   1  108.59    8.00
  -5  -7   1  101.79    8.20
   4   7  -1    0.60    4.10
  -4  -7   1    0.00    2.80
  -4  -7   1    0.50    2.10
   3   7  -1  656.53   29.80
  -3  -7   1  643.54   20.90
  -3  -7   1  635.74   20.30
   2   7  -1  298.27   18.80
  -2  -7   1  302.87   12.70
  -2  -7   1  287.97   13.00
   1   7  -1    5.00    4.20
  -1  -7   1    0.80    2.10
  -1  -7   1    7.60    3.10
   0   7  -1    5.80    4.20
   0   7  -1    9.30    3.40
   0  -7   1    9.70    3.30
   0  -7   1    9.60    3.70
  -1   7  -1    9.10    4.00
  -1   7  -1    3.50    3.60
   1  -7   1    3.90    3.20
   1  -7   1   10.60    4.40
  -2   7  -1    3.60    4.10
  -2   7  -1    7.10    3.70
   2  -7   1   -1.50    3.00
   2  -7   1   -1.60    3.20
  -3   7  -1    0.80    3.30
  -3   7  -1   -2.70    3.00
   3  -7   1    1.20    3.30
  -4   7  -1  158.98   13.40
  -4   7  -1  174.58   12.20
   4  -7   1  177.78   11.50
  -5   7  -1  117.99   12.20
  -5   7  -1   97.99   13.90
   5  -7   1  115.49    8.90
  -6   7  -1  356.46   21.70
   6  -7   1  346.47   14.10
  -7   7  -1   -4.40    4.20
  -8   7  -1   25.60    8.30
   9   6  -1   11.00    6.60
  -9  -6   1    9.10    5.10
   8   6  -1    7.10    6.30
  -8  -6   1   22.90    5.80
   7   6  -1   59.09    8.60
   7   6  -1   69.99   11.70
  -7  -6   1   61.19    8.00
   6   6  -1  187.68   11.10
   6   6  -1  181.28   18.40
  -6  -6   1  174.58   12.80
   5   6  -1   19.50    6.20
   5   6  -1   15.90    4.20
  -5  -6   1   20.10    4.20
   4   6  -1   12.70    3.20
   4   6  -1    6.90    4.30
  -4  -6   1    8.50    3.10
  -4  -6   1   10.80    2.90
   3   6  -1  195.58   14.80
  -3  -6   1  206.88    9.40
  -3  -6   1  208.88   10.00
   2   6  -1   12.00    4.30
  -2  -6   1    6.30    2.60
  -2  -6   1    3.80    3.50
  -2  -6   1    9.60    2.60
   1   6  -1    3.90    3.80
  -1  -6   1   -0.20    1.90
  -1  -6   1    3.10    2.20
  -1  -6   1    0.70    3.60
   0   6  -1  198.38   13.70
   0   6  -1  224.88   11.10
   0  -6   1  215.58   10.80
   0  -6   1  230.78   11.50
   0  -6   1  205.78   13.30
  -1   6  -1  187.98   11.00
  -1   6  -1  210.28   13.40
   1  -6   1  216.28   14.70
   1  -6   1  199.38   11.20
  -2   6  -1   -0.40    1.50
  -2   6  -1    0.20    3.00
   2  -6   1    1.10    2.30
   2  -6   1   -3.80    2.80
  -3   6  -1   16.40    5.40
   3  -6   1   19.00    5.40
   3  -6   1   18.10    4.30
  -4   6  -1   40.30    7.20
  -4   6  -1   43.60    6.40
   4  -6   1   32.20    5.40
  -5   6  -1  249.08   17.10
  -5   6  -1  255.77   12.10
   5  -6   1  245.78   11.40
  -6   6  -1  153.88   14.20
  -6   6  -1  162.88    7.30
  -6   6  -1  165.08    7.80
   6  -6   1  160.58    7.40
  -7   6  -1  153.48   14.20
  -8   6  -1    4.10    4.20
  -9   6  -1   35.80    9.90
   9   5  -1   12.30    7.20
  -9  -5   1   27.30    6.30
  -8  -5   1    4.30    4.10
   7   5  -1  224.08   13.20
   7   5  -1  244.08   17.50
  -7  -5   1  254.47   13.90
   6   5  -1   85.69   11.90
   6   5  -1   70.39    6.90
   5   5  -1  278.17   17.40
   5   5  -1  262.97   11.90
  -5  -5   1  258.47   12.10
   4   5  -1  813.12   30.60
   4   5  -1  792.72   22.50
  -4  -5   1  751.42   29.00
  -4  -5   1  779.42   22.60
   3   5  -1  111.59   10.60
   3   5  -1   90.09    6.80
  -3  -5   1  109.09    7.10
  -3  -5   1  103.49    9.30
  -3  -5   1  101.79    6.20
   2   5  -1  688.63   26.10
  -2  -5   1  647.14   20.40
  -2  -5   1  695.93   29.10
  -2  -5   1  657.73   18.90
   1   5  -1    4.10    2.30
   1   5  -1    7.20    4.20
  -1  -5   1    5.10    2.20
  -1  -5   1    5.70    2.10
  -1  -5   1    7.10    3.70
   0   5  -1  450.65   15.50
   0   5  -1  453.95   19.30
   0  -5   1  447.06   15.40
   0  -5   1  445.06   18.70
  -1   5  -1   96.39    7.20
  -1   5  -1   83.79    8.00
   1  -5   1   83.99    6.80
   1  -5   1   76.09    7.40
  -2   5  -1    7.70    3.20
  -2   5  -1   -1.60    2.00
   2  -5   1    4.60    2.70
   2  -5   1    6.60    2.70
  -3   5  -1  123.49    9.60
  -3   5  -1  115.39    8.10
   3  -5   1  113.99    7.80
   3  -5   1  116.89    9.30
  -4   5  -1  226.28   14.30
  -4   5  -1  228.68   10.90
   4  -5   1  234.48   10.50
  -5   5  -1  845.02   32.10
  -5   5  -1  864.41   23.20
   5  -5   1  883.91   23.10
  -6   5  -1   17.80    5.70
  -7   5  -1  340.17   21.40
  -8   5  -1   -0.20    3.00
  -9   5  -1   36.60   10.00
  10   4  -1   11.80    6.60
 -10  -4   1   23.70    7.80
   9   4  -1  288.07   18.70
  -9  -4   1  301.87   17.80
   8   4  -1    1.80    4.30
  -8  -4   1   17.20    5.10
   7   4  -1   90.39   11.80
   7   4  -1   92.49    8.70
  -7  -4   1  112.79    9.50
   6   4  -1   29.30    5.50
   6   4  -1   24.20    6.40
  -6  -4   1   40.30    7.40
  -6  -4   1   28.00    6.40
   5   4  -1  619.34   20.30
   5   4  -1  643.44   25.50
  -5  -4   1  627.04   20.50
  -5  -4   1  617.54   24.60
   4   4  -1 1835.82   49.80
   4   4  -1 1755.92   41.70
  -4  -4   1 1771.82   41.90
  -4  -4   1 1727.93   48.80
   3   4  -1 1818.72   40.80
   3   4  -1 1826.52   49.10
  -3  -4   1 1837.72   41.10
  -3  -4   1 1739.73   47.80
   2   4  -1 1531.45   34.30
   2   4  -1 1436.86   41.80
  -2  -4   1 1531.35   34.40
  -2  -4   1 1495.45   34.10
  -2  -4   1 1556.14   41.70
   1   4  -1 1454.45   33.40
   1   4  -1 1396.26   39.30
  -1  -4   1 1430.06   39.10
  -1  -4   1 1473.45   33.20
  -1  -4   1 1485.15   33.70
   0   4  -1   78.49    5.40
   0   4  -1   80.19    7.40
   0  -4   1   86.19    6.90
  -1   4  -1    3.30    2.90
  -1   4  -1    7.20    2.70
   1  -4   1    7.50    3.20
   1  -4   1    7.00    2.80
  -2   4  -1   18.80    4.50
  -2   4  -1   17.90    3.80
   2  -4   1   19.10    3.80
   2  -4   1   16.70    4.10
  -3   4  -1   40.80    6.20
  -3   4  -1   52.69    5.00
   3  -4   1   62.39    7.80
  -4   4  -1  874.31   29.70
  -4   4  -1  849.61   22.30
   4  -4   1  843.32   29.30
   4  -4   1  837.42   22.00
  -5   4  -1    1.60    1.10
  -5   4  -1   -0.60    3.00
  -6   4  -1    6.10    4.80
  -7   4  -1    9.30    4.80
  -8   4  -1   17.90    6.90
  -9   4  -1    7.70    5.90
 -10   4  -1   21.20    8.00
 -10  -3   1    5.00    4.90
   9   3  -1   22.90    6.40
  -9  -3   1   22.40    6.30
  -9  -3   1    8.30    6.10
   8   3  -1  314.77   17.30
  -8  -3   1  264.17   15.60
  -8  -3   1  310.37   16.90
   7   3  -1   53.99    8.60
   7   3  -1   66.39    8.50
  -7  -3   1   49.70    7.70
  -7  -3   1   59.79    8.00
   6   3  -1  245.78   13.30
   6   3  -1  298.57   15.80
  -6  -3   1  268.77   13.60
  -6  -3   1  294.07   15.00
   5   3  -1    3.00    2.90
   5   3  -1    5.90    2.80
  -5  -3   1    6.20    2.60
  -5  -3   1    4.70    3.10
   4   3  -1 2000.40   51.49
   4   3  -1 2000.70   46.40
  -4  -3   1 2027.30   46.60
  -4  -3   1 2008.50   50.89
   3   3  -1 2583.44   60.79
   3   3  -1 2459.05   53.99
  -3  -3   1 2510.65   60.09
  -3  -3   1 2531.65   54.29
   2   3  -1 2208.98   46.60
   2   3  -1 2237.58   53.49
  -2  -3   1 2170.18   46.60
  -2  -3   1 2241.78   53.09
   1   3  -1    1.90    1.90
  -1  -3   1    0.30    1.00
  -1  -3   1   -0.60    0.90
  -1  -3   1   -0.40    1.70
   0   3  -1  225.58   10.30
   0   3  -1  217.18    8.00
   0  -3   1  209.58    7.80
   0  -3   1  218.68   10.00
  -1   3  -1    8.80    2.60
  -1   3  -1   10.00    2.50
   1  -3   1    8.00    2.40
   1  -3   1   11.80    2.70
  -2   3  -1  307.57   12.70
  -2   3  -1  283.37   10.70
   2  -3   1  303.87   12.50
   2  -3   1  294.77   10.60
  -3   3  -1 1483.05   39.80
  -3   3  -1 1439.66   33.80
   3  -3   1 1529.65   34.00
   3  -3   1 1517.25   40.00
  -4   3  -1   94.69    8.30
  -4   3  -1   93.79    4.20
  -4   3  -1  102.99    4.40
  -5   3  -1  448.06   20.30
   5  -3   1  440.86   20.70
  -6   3  -1  150.78   12.60
  -7   3  -1  189.38   15.00
  -8   3  -1   44.90    8.80
  -9   3  -1    1.50    4.60
 -10   3  -1   28.80    9.10
 -10  -2   1   34.80    8.00
   9   2  -1   93.19    9.30
  -9  -2   1  101.29    9.30
  -9  -2   1  104.19   14.90
   8   2  -1   46.50    7.10
  -8  -2   1   37.40    6.10
  -8  -2   1   47.70    8.10
   7   2  -1    3.50    3.00
   7   2  -1   -1.10    2.90
  -7  -2   1    2.90    2.80
  -7  -2   1   -0.90    3.10
   6   2  -1  671.33   22.80
   6   2  -1  646.94   23.10
  -6  -2   1  633.24   22.60
  -6  -2   1  616.24   21.80
   5   2  -1  196.28   11.10
   5   2  -1  206.88   10.70
  -5  -2   1  212.98   10.90
  -5  -2   1  218.28   11.10
   4   2  -1 5098.09  107.99
   4   2  -1 5296.37  110.59
  -4  -2   1 5041.30  109.59
  -4  -2   1 5221.68  107.99
   3   2  -1  359.96   14.10
   3   2  -1  376.46   11.80
  -3  -2   1  372.96   11.80
  -3  -2   1  391.66   14.20
   2   2  -1 1286.97   32.00
   2   2  -1 1333.07   27.40
  -2  -2   1 1089.89   32.80
  -2  -2   1 1303.37   27.40
   1   2  -1  146.19    7.30
  -1  -2   1  157.08    4.50
  -1  -2   1  156.88    7.40
  -1  -2   1  153.58    4.40
   0   2  -1  916.61   23.10
   0   2  -1  903.11   20.70
   0  -2   1  888.61   20.70
   0  -2   1  935.21   23.10
  -1   2  -1 1037.80   24.20
  -1   2  -1  973.40   24.60
   1  -2   1 1030.70   24.80
   1  -2   1  966.20   23.80
  -2   2  -1  165.38    6.20
  -2   2  -1  155.98    8.30
   2  -2   1  170.28    6.30
   2  -2   1  159.88    8.20
  -3   2  -1 1776.22   36.90
  -3   2  -1 1733.13   36.70
  -3   2  -1 1767.32   44.30
   3  -2   1 1752.82   44.30
  -4   2  -1  913.31   29.40
   4  -2   1  968.50   30.10
  -5   2  -1   46.30    7.40
   5  -2   1   51.59    7.70
  -6   2  -1   14.50    4.10
  -7   2  -1  164.08   14.00
  -8   2  -1  103.59   11.80
  -9   2  -1    2.50    3.90
 -10   2  -1   10.30    5.80
  10   1  -1   21.40    3.40
 -10  -1   1   12.70    5.50
   9   1  -1   53.09    5.90
  -9  -1   1   38.40    5.60
  -9  -1   1   44.80    8.90
   8   1  -1   19.30    4.10
  -8  -1   1   15.90    5.30
  -8  -1   1   15.40    3.90
   7   1  -1  175.38    9.70
   7   1  -1  161.28   12.30
  -7  -1   1  162.28    9.00
  -7  -1   1  163.48   12.00
   6   1  -1  183.68    9.40
   6   1  -1  157.48   10.80
  -6  -1   1  160.58    8.60
  -6  -1   1  167.88   10.90
   5   1  -1   13.30    3.80
   5   1  -1   17.30    3.50
  -5  -1   1   13.40    3.00
  -5  -1   1   14.30    4.00
   4   1  -1  446.16   15.80
   4   1  -1  471.55   15.20
  -4  -1   1  476.65   16.00
  -4  -1   1  462.35   15.00
   3   1  -1  816.22   21.40
   3   1  -1  812.12   21.20
  -3  -1   1  827.42   21.10
  -3  -1   1  765.82   21.00
   2   1  -1 1271.37   29.40
   2   1  -1 1279.47   27.70
  -2  -1   1 1268.07   27.50
  -2  -1   1 1196.48   29.20
   1   1  -1 6265.27  163.08
  -1  -1   1 5485.25  159.48
   0   1  -1   -0.30    0.40
   0   1  -1    0.20    0.40
  -1   1  -1  270.07    7.70
  -1   1  -1  281.97    8.00
  -1   1  -1  270.27    9.20
   1  -1   1  282.87    8.10
   1  -1   1  276.87    9.30
  -2   1  -1    0.60    1.40
  -2   1  -1   -0.60    0.80
   2  -1   1   -1.20    1.10
  -3   1  -1 1884.61   46.40
  -3   1  -1 1905.01   39.60
   3  -1   1 1950.70   46.80
  -4   1  -1  374.16   19.10
  -4   1  -1  425.86   10.50
   4  -1   1  412.86   17.20
  -5   1  -1   21.90    1.80
  -5   1  -1   15.00    4.30
   5  -1   1   16.50    4.60
  -6   1  -1  218.68   14.10
  -7   1  -1 1138.19   39.30
  -8   1  -1   31.10    7.70
  -9   1  -1    3.40    3.90
 -10   0   1  106.59   13.70
  -9   0   1   31.00    7.60
   8   0  -1   17.00    2.40
   8   0  -1   16.60    2.40
  -8   0   1   11.70    2.20
  -8   0   1   23.50    6.60
   7   0  -1  626.24   17.30
  -7   0   1  640.54   17.30
  -7   0   1  634.24   25.40
   6   0  -1   12.70    2.50
   6   0  -1   14.90    4.10
  -6   0   1    5.60    1.80
  -6   0   1   13.90    4.10
   5   0  -1  523.25   14.50
   5   0  -1  528.15   19.60
  -5   0   1  456.45   20.90
  -5   0   1  507.65   14.40
   4   0  -1 4020.10   81.69
   4   0  -1 3957.30   86.79
  -4   0   1 3949.90   81.59
  -4   0   1 4012.20   86.79
   3   0  -1 1312.17   28.90
  -3   0   1 1324.37   31.90
  -3   0   1 1276.97   28.90
   2   0  -1 1774.32   38.30
   2   0  -1 1775.72   36.90
  -2   0   1 1690.13   36.80
  -2   0   1 1747.63   38.10
   1   0  -1    4.70    0.90
   1   0  -1    4.50    0.90
  -1   0   1   -0.10    0.30
  -1   0   1   -0.10    0.50
  -1   0  -1 9434.16  256.27
  -2   0  -1 1674.63   38.60
  -2   0  -1 1636.84   35.80
   2   0   1 1614.94   38.30
   2   0   1 1660.43   35.80
  -3   0  -1   25.50    2.80
  -3   0  -1   26.60    4.50
   3   0   1   24.40    2.70
   3   0   1   19.20    4.00
  -4   0  -1  491.75   14.40
  -4   0  -1  491.35   18.90
   4   0   1  501.05   14.60
   4   0   1  487.25   18.80
  -5   0  -1  293.67   10.50
  -5   0  -1  301.17   15.30
   5   0   1  292.87   10.60
  -6   0  -1  345.37   17.80
  -6   0  -1  349.27   11.90
   6   0   1  324.17   17.90
   6   0   1  354.16   12.10
  -7   0  -1 1643.94   37.40
  -7   0  -1 1578.24   48.70
   7   0   1 1605.24   37.30
  -8   0  -1   51.79    8.90
  -8   0  -1   52.39    4.10
   8   0   1   55.29    3.90
  -9   0  -1    5.60    4.40
 -10   0  -1   -1.40    5.70
 -10   1   1  202.88   17.30
  -9   1   1   23.00    6.70
  -8   1   1   11.90    5.10
  -7   1   1   39.30    7.60
   6  -1  -1   60.29    8.10
  -6   1   1   72.29    7.50
   5  -1  -1    3.50    3.10
  -5   1   1    8.90    3.30
   4  -1  -1  885.41   26.30
   4  -1  -1  865.41   18.50
   4  -1  -1  863.71   18.50
  -4   1   1  867.01   25.90
   3  -1  -1 1883.81   39.40
   3  -1  -1 1950.70   39.50
   3  -1  -1 1965.00   45.50
  -3   1   1 1923.31   45.30
   2  -1  -1 5261.47  154.48
   1  -1  -1  601.24   15.50
   1  -1  -1  623.14   15.00
  -1   1   1  595.14   15.00
  -1   1   1  609.14   15.60
  -1  -1  -1  737.23   19.20
  -1  -1  -1  737.73   18.70
   1   1   1  753.82   18.80
   1   1   1  738.43   19.30
  -2  -1  -1 1433.26   34.10
  -2  -1  -1 1403.66   33.60
   2   1   1 1444.76   34.10
   2   1   1 1390.66   33.60
  -3  -1  -1  171.28    9.10
  -3  -1  -1  156.88    8.00
   3   1   1  173.28    8.50
   3   1   1  175.88    9.20
  -4  -1  -1  753.32   25.00
  -4  -1  -1  816.62   23.00
   4   1   1  804.62   25.40
   4   1   1  800.82   23.10
  -5  -1  -1   68.59    6.00
  -5  -1  -1   61.19    8.10
   5   1   1   75.79    7.40
   5   1   1   74.79    6.10
  -6  -1  -1    1.10    2.40
  -6  -1  -1    2.20    3.50
   6   1   1    2.60    3.30
   6   1   1    5.60    2.90
  -7  -1  -1  782.22   24.10
  -7  -1  -1  766.72   30.00
   7   1   1  795.12   24.50
  -8  -1  -1   37.60    7.90
  -8  -1  -1   29.70    5.00
   8   1   1   33.30    5.40
  -9  -1  -1    9.30    4.30
  -9  -1  -1   19.10    6.60
   9   1   1    5.50    3.30
 -10  -1  -1   12.00    6.40
 -10   2   1   30.50    9.20
  -9   2   1    3.60    4.60
  -8   2   1   58.99    9.80
  -7   2   1   59.89    9.40
  -6   2   1    4.90    3.00
   5  -2  -1 1866.71   50.89
  -5   2   1 1945.51   50.69
   4  -2  -1  127.59    3.80
   4  -2  -1  126.79    8.80
   4  -2  -1  130.99    3.90
   3  -2  -1   33.40    2.70
   3  -2  -1   37.60    5.10
  -3   2   1   31.10    4.80
  -3   2   1   33.80    2.70
   2  -2  -1  277.07   10.80
   2  -2  -1  267.27    9.00
  -2   2   1  263.97   10.60
  -2   2   1  265.47    9.00
   1  -2  -1 1036.90   26.60
   1  -2  -1 1142.39   27.10
  -1   2   1 1142.69   27.20
  -1   2   1 1092.79   26.90
   0  -2  -1 6433.86  201.58
   0   2   1 6354.36  198.98
  -1  -2  -1 1178.98   28.10
   1   2   1 1159.18   30.00
   1   2   1 1145.49   27.90
  -2  -2  -1 1630.54   38.00
  -2  -2  -1 1618.74   39.30
   2   2   1 1533.75   39.10
   2   2   1 1551.24   39.90
  -3  -2  -1 2359.86   53.89
  -3  -2  -1 2239.08   54.09
   3   2   1 2261.07   53.39
   3   2   1 2317.87   54.59
  -4  -2  -1  554.44   19.90
  -4  -2  -1  568.24   19.70
   4   2   1  545.45   19.80
   4   2   1  540.65   19.80
  -5  -2  -1   28.30    5.00
  -5  -2  -1   35.00    6.10
   5   2   1   27.40    5.40
   5   2   1   33.60    5.70
  -6  -2  -1   14.20    4.10
  -6  -2  -1    7.20    4.20
   6   2   1   15.50    4.70
   6   2   1   17.40    4.90
  -7  -2  -1  137.59   11.80
  -7  -2  -1  132.59   10.20
   7   2   1  154.28   10.80
  -8  -2  -1    7.10    5.30
  -8  -2  -1    1.30    4.00
   8   2   1    9.90    4.90
  -9  -2  -1   -8.10    4.60
  -9  -2  -1    0.30    4.50
   9   2   1    7.70    4.40
 -10  -2  -1   53.19   10.70
  10   2   1   25.30    6.10
  -9   3   1   98.99   13.90
  -8   3   1   14.70    6.00
  -7   3   1  153.28   13.10
  -6   3   1  498.85   22.50
   5  -3  -1   67.19    7.20
  -5   3   1   57.69    8.10
   4  -3  -1  364.46   16.50
   4  -3  -1  355.76   10.70
  -4   3   1  355.76   16.30
  -4   3   1  377.56   11.00
   3  -3  -1 2316.27   52.39
   3  -3  -1 2456.15   57.79
  -3   3   1 2455.25   52.99
  -3   3   1 2429.66   57.79
   2  -3  -1    0.80    1.90
   2  -3  -1    2.70    1.90
  -2   3   1    2.80    2.50
  -2   3   1    1.50    1.90
   1  -3  -1  201.88    9.20
   1  -3  -1  190.08    9.30
  -1   3   1  202.28    9.30
  -1   3   1  202.08    9.70
   0  -3  -1  864.41   23.70
   0  -3  -1  875.61   23.30
   0  -3  -1  890.91   25.40
   0   3   1  866.61   25.40
   0   3   1  876.81   23.50
  -1  -3  -1 2466.45   54.19
  -1  -3  -1 2475.25   57.59
  -1  -3  -1 2488.05   54.39
   1   3   1 2284.47   56.99
   1   3   1 2421.56   54.19
  -2  -3  -1 1450.75   39.30
  -2  -3  -1 1491.45   36.60
   2   3   1 1509.95   40.00
   2   3   1 1459.65   36.30
  -3  -3  -1  524.65   19.80
  -3  -3  -1  510.75   17.90
   3   3   1  490.95   17.50
   3   3   1  518.95   20.20
  -4  -3  -1 2520.55   59.99
  -4  -3  -1 2451.65   61.39
   4   3   1 2466.45   59.49
   4   3   1 2513.55   62.79
  -5  -3  -1   -0.90    2.70
  -5  -3  -1   -0.60    2.50
   5   3   1   -0.80    2.90
   5   3   1   -0.60    2.40
  -6  -3  -1 1531.95   44.90
  -6  -3  -1 1515.85   44.40
   6   3   1 1627.94   45.90
   6   3   1 1503.15   44.70
  -7  -3  -1  789.72   30.10
  -7  -3  -1  771.12   28.40
   7   3   1  773.72   29.30
  -8  -3  -1   11.60    5.70
   8   3   1   11.50    5.10
  -9  -3  -1  167.88   14.70
   9   3   1  159.48   12.90
 -10  -3  -1  289.87   20.60
 -10   4   1   -3.30    4.30
  -9   4   1  219.88   18.10
  -8   4   1   18.80    6.70
  -7   4   1  852.81   33.80
  -6   4   1  234.58   15.30
   5  -4  -1  105.39    5.10
  -5   4   1  101.59    5.20
  -5   4   1  102.99    9.60
   4  -4  -1   16.00    3.10
   4  -4  -1   22.00    5.10
  -4   4   1   26.50    5.50
  -4   4   1   22.90    3.70
   3  -4  -1 1027.80   31.20
   3  -4  -1 1035.80   28.00
  -3   4   1 1042.30   31.60
  -3   4   1 1049.00   28.60
   2  -4  -1 2077.59   50.49
   2  -4  -1 2155.68   51.89
  -2   4   1 2159.58   51.39
  -2   4   1 2107.99   52.09
   1  -4  -1   15.10    3.80
   1  -4  -1   15.60    3.90
  -1   4   1   14.80    4.00
  -1   4   1   10.20    4.00
   0  -4  -1   29.50    4.50
   0  -4  -1   34.20    5.00
   0  -4  -1   27.00    5.40
   0   4   1   27.90    4.60
   0   4   1   25.10    5.00
  -1  -4  -1  580.84   18.40
  -1  -4  -1  575.74   21.50
  -1  -4  -1  586.74   18.70
   1   4   1  550.54   21.60
   1   4   1  549.65   18.30
  -2  -4  -1  412.56   18.30
  -2  -4  -1  454.65   16.30
   2   4   1  460.05   19.70
   2   4   1  442.76   16.00
  -3  -4  -1  206.58   12.70
  -3  -4  -1  200.28   10.80
   3   4   1  199.88   10.60
   3   4   1  213.88   13.60
  -4  -4  -1  254.47   14.90
   4   4   1  260.17   12.90
   4   4   1  260.67   15.60
  -5  -4  -1  435.16   18.90
  -5  -4  -1  456.45   21.10
   5   4   1  454.55   21.60
   5   4   1  419.86   21.30
  -6  -4  -1    8.00    4.40
   6   4   1   10.30    4.80
   6   4   1    7.20    4.50
  -7  -4  -1  259.67   16.10
   7   4   1  220.48   15.70
   8   4   1    3.30    4.80
  -9  -4  -1   13.10    6.20
   9   4   1   10.70    6.20
  -8   5   1   11.60    5.70
  -7   5   1   62.69   10.70
   6  -5  -1  372.26   10.80
  -6   5   1  377.16   10.90
   5  -5  -1   33.70    4.40
  -5   5   1   38.00    7.10
  -5   5   1   31.10    4.50
   4  -5  -1    3.90    2.00
  -4   5   1    3.80    2.90
  -4   5   1   -1.10    3.00
   3  -5  -1  228.78   13.20
   3  -5  -1  256.27   12.50
  -3   5   1  250.37   14.00
  -3   5   1  267.57   13.30
   2  -5  -1  107.79    8.50
   2  -5  -1   94.99    7.80
  -2   5   1  109.59    8.50
  -2   5   1  117.49    9.10
   1  -5  -1  719.83   25.40
   1  -5  -1  759.52   24.30
  -1   5   1  795.12   30.80
   0  -5  -1  193.18   12.00
   0  -5  -1  167.68    9.60
   0  -5  -1  171.88   10.20
   0   5   1  169.98   10.00
   0   5   1  168.78   11.60
  -1  -5  -1  668.23   21.50
  -1  -5  -1  652.43   21.60
   1   5   1  647.84   25.60
  -2  -5  -1  847.22   25.80
  -2  -5  -1  810.52   29.90
  -2  -5  -1  879.21   26.40
   2   5   1  924.91   32.00
   2   5   1  858.71   26.20
  -3  -5  -1  363.96   15.60
  -3  -5  -1  372.96   19.20
   3   5   1  362.26   19.40
   3   5   1  370.46   15.60
  -4  -5  -1  474.95   19.00
   4   5   1  466.55   22.90
   4   5   1  448.76   18.40
  -5  -5  -1  416.46   18.80
   5   5   1  407.86   21.90
   5   5   1  378.36   17.60
  -6  -5  -1  219.58   14.00
   6   5   1  219.48   14.00
   6   5   1  208.38   16.10
  -7  -5  -1   -3.50    2.50
   7   5   1    0.10    3.80
  -8  -5  -1   67.99   10.70
   8   5   1   85.79   12.40
  -9  -5  -1   81.99   11.80
   9   5   1   72.89   11.50
  -9   6   1   44.00   10.10
  -8   6   1   13.20    5.90
  -7   6   1    1.50    3.30
   6  -6  -1   33.30    4.40
  -6   6   1   37.90    4.70
  -6   6   1   42.50    8.50
   5  -6  -1   45.50    6.10
  -5   6   1   61.69    6.80
  -5   6   1   55.69    9.50
   4  -6  -1    4.10    2.80
  -4   6   1   -1.20    3.00
  -4   6   1    2.70    3.30
   3  -6  -1  939.01   30.20
  -3   6   1  936.11   31.10
  -3   6   1  956.20   32.60
   2  -6  -1  344.07   16.50
   2  -6  -1  355.76   17.20
  -2   6   1  350.96   17.00
  -2   6   1  366.56   17.80
   1  -6  -1  426.86   18.40
   1  -6  -1  440.86   20.60
   1  -6  -1  397.26   19.20
  -1   6   1  398.46   19.60
  -1   6   1  409.76   17.90
   0  -6  -1  557.64   20.70
   0  -6  -1  581.44   21.70
   0  -6  -1  609.44   24.80
   0   6   1  562.24   24.50
   0   6   1  581.44   21.50
  -1  -6  -1  309.87   14.10
  -1  -6  -1  315.07   14.70
  -1  -6  -1  295.77   17.10
   1   6   1  303.97   17.60
  -2  -6  -1   35.60    5.90
  -2  -6  -1   35.20    5.60
   2   6   1   36.00    5.90
   2   6   1   34.40    7.80
  -3  -6  -1  399.16   17.00
  -3  -6  -1  435.06   18.20
   3   6   1  429.96   22.80
   3   6   1  415.56   17.70
  -4  -6  -1  845.32   28.80
   4   6   1  897.81   35.50
  -5  -6  -1    3.50    3.40
   5   6   1    2.30    3.40
   5   6   1    5.30    6.00
  -6  -6  -1  654.03   26.40
   6   6   1  750.82   33.60
  -7  -6  -1  271.27   16.70
   7   6   1  296.57   21.10
  -8  -6  -1   66.69   10.30
   8   6   1   57.69   11.00
  -8   7   1   38.90   10.60
   7  -7  -1  175.88    9.70
  -7   7   1  170.08   15.70
  -7   7   1  200.68    8.30
   6  -7  -1   32.90    5.30
  -6   7   1   42.50    8.80
  -6   7   1   33.20    5.70
   5  -7  -1   51.99    7.20
  -5   7   1   56.89    9.60
  -5   7   1   51.79    7.70
   4  -7  -1   16.20    6.20
  -4   7   1   15.70    5.90
  -4   7   1   18.60    5.30
   3  -7  -1  288.47   15.90
  -3   7   1  304.07   17.20
  -3   7   1  277.97   16.60
   2  -7  -1  144.79   11.40
   2  -7  -1  142.59   11.70
  -2   7   1  139.09   12.20
  -2   7   1  166.68   12.20
   1  -7  -1    9.50    3.90
   1  -7  -1    9.50    4.50
  -1   7   1   11.20    4.80
  -1   7   1    7.00    4.70
   0  -7  -1  133.59    9.80
   0  -7  -1  119.99   10.10
   0   7   1  127.89   12.50
  -1  -7  -1 1155.98   35.30
  -1  -7  -1 1150.48   34.50
   1   7   1 1155.58   41.20
  -2  -7  -1  473.25   21.60
  -2  -7  -1  460.35   19.60
   2   7   1  433.66   24.10
  -3  -7  -1    6.80    3.80
  -3  -7  -1    5.60    2.60
   3   7   1    6.00    3.80
  -4  -7  -1  179.68   12.60
  -4  -7  -1  184.98   12.10
   4   7   1  169.98   15.30
   4   7   1  174.08   11.90
  -5  -7  -1    6.10    4.30
  -5  -7  -1    2.10    3.50
   5   7   1    8.00    4.50
   5   7   1   -0.80    5.40
  -6  -7  -1   -0.70    3.80
   6   7   1    5.10    6.10
  -7  -7  -1   18.10    5.70
   7   7   1   22.70    8.10
  -8  -7  -1   -2.00    4.80
   8   7   1   -9.80    5.20
  -8   8   1   -4.80    6.20
  -7   8   1   58.99    7.60
  -7   8   1   60.89   14.20
   6  -8  -1    8.50    4.10
  -6   8   1   12.00    5.30
  -6   8   1   16.30    6.70
  -5   8   1    6.60    4.60
  -5   8   1    3.40    3.60
  -4   8   1  140.79   12.30
  -4   8   1  147.89   13.40
  -3   8   1   50.59    9.00
  -3   8   1   47.80   10.20
   2  -8  -1    1.00    2.70
  -2   8   1    2.20    3.10
  -2   8   1    3.10    5.30
   1  -8  -1  109.89   10.60
  -1   8   1   93.99   12.80
  -1   8   1   97.39    9.90
   0  -8  -1 1318.77   41.10
   0   8   1 1315.27   46.60
  -1  -8  -1   89.59    9.50
  -1  -8  -1   91.29    8.80
   1   8   1   91.19   13.30
  -2  -8  -1    2.60    3.90
  -2  -8  -1   -0.90    2.60
   2   8   1   -0.50    5.10
  -3  -8  -1   -1.60    3.30
  -3  -8  -1   -2.50    3.60
   3   8   1   -0.10    3.40
  -4  -8  -1   80.39    9.20
   4   8   1   91.49   14.10
  -5  -8  -1   16.60    5.80
   5   8   1   38.10   10.50
  -6  -8  -1  242.08   16.00
   6   8   1  246.68   21.40
  -7  -8  -1   80.19   12.50
   7   8   1  101.49   16.40
  -7   9   1  136.89   14.90
  -6   9   1  116.19   11.60
  -5   9   1    3.40    5.00
  -5   9   1    9.40    6.00
  -4   9   1  138.99   13.90
  -4   9   1  153.18   14.40
   3  -9  -1   51.69    9.60
  -3   9   1   51.79    9.40
  -3   9   1   57.79   10.60
   2  -9  -1  136.49   12.70
  -2   9   1  135.19   12.20
  -2   9   1  133.99   14.20
   1  -9  -1   44.90    8.60
  -1   9   1   31.70    8.60
  -1   9   1   24.00    7.40
   0  -9  -1  143.59   12.70
   0   9   1  134.19   14.10
  -1  -9  -1   11.40    5.20
   1   9   1    4.30    5.50
  -2  -9  -1    1.20    3.40
   2   9   1    5.50    5.90
  -3  -9  -1  100.59   10.30
   3   9   1  114.49   16.70
  -4  -9  -1   16.80    6.30
   4   9   1   16.50    6.90
  -5  -9  -1   25.90    6.30
  -6  -9  -1   13.30    6.40
   6   9   1    0.10    5.80
  -5  10   1   10.00    7.10
  -5  10   1   -4.80    5.50
   4 -10  -1    5.00    6.00
  -4  10   1    9.90    6.70
  -4  10   1    9.40    5.70
   3 -10  -1  277.67   20.20
  -3  10   1  304.37   20.40
  -3  10   1  282.77   21.20
   2 -10  -1   32.40    8.60
  -2  10   1   27.00    6.70
  -2  10   1   41.90    9.30
   1 -10  -1   -2.70    4.30
  -1  10   1   -1.80    5.40
   0 -10  -1   12.50    5.50
   0  10   1   30.90    9.30
  -1 -10  -1    3.60    4.60
   1  10   1    5.40    5.50
  -2 -10  -1   12.00    5.40
   2  10   1   25.40    8.40
  -3 -10  -1   77.79   11.00
   3  10   1   44.30   11.60
  -4 -10  -1   76.39   11.00
   4  10   1   74.89   15.80
   3 -11  -1   37.50    9.90
  -3  11   1   24.40    9.40
  -3  11   1   44.60   10.00
   2 -11  -1   -5.70    5.00
  -2  11   1    7.70    6.00
  -2  11   1    7.00    7.20
   1 -11  -1  110.59   14.40
  -1  11   1  116.49   16.90
   0 -11  -1   34.00    8.50
   0  11   1   18.20    7.80
  -1 -11  -1   83.39   12.20
   1  11   1   72.69   14.40
  -2 -11  -1   39.20    9.00
   2  11   1   37.10   10.60
   3  11  -2   39.90   12.10
  -3 -11   2   37.00   13.00
   2  11  -2   44.20   12.10
  -2 -11   2   24.60    6.70
   1  11  -2  105.69   16.40
  -1 -11   2  120.69   11.50
   0  11  -2   50.29   12.10
   0 -11   2   44.60    8.20
  -1  11  -2   -1.70    5.60
  -1  11  -2   -2.40    4.60
   1 -11   2   -2.60    4.00
  -2  11  -2   -3.00    6.90
  -2  11  -2    3.40    4.50
   2 -11   2   -5.80    4.40
  -3  11  -2    3.50    5.10
  -3  11  -2  -11.40    5.60
   5  10  -2   -3.50    7.10
   4  10  -2  120.99   18.40
  -4 -10   2  132.09    9.60
   3  10  -2   70.79   13.30
   2  10  -2   50.19   11.60
  -2 -10   2   45.80    7.20
   1  10  -2   -1.50    5.50
  -1 -10   2    7.30    4.10
  -1 -10   2   -0.20    4.20
   0  10  -2   22.30    7.90
   0  10  -2    5.70    4.40
   0 -10   2   26.70    6.50
  -1  10  -2  101.69   14.50
  -1  10  -2  119.49   11.40
   1 -10   2  117.99   11.10
  -2  10  -2   91.99   10.50
  -2  10  -2   68.19   11.80
  -3  10  -2  138.39   13.50
  -3  10  -2  153.88   15.50
  -4  10  -2  118.29   13.70
  -4  10  -2  116.89   13.40
  -5  10  -2   -1.30    4.50
  -5  10  -2   -7.70    4.90
   6   9  -2    0.20    5.80
   5   9  -2    3.30    6.10
  -5  -9   2    4.90    3.10
   4   9  -2  263.47   21.70
  -4  -9   2  270.07   11.50
  -4  -9   2  249.58   11.70
   3   9  -2   -2.50    2.80
  -3  -9   2   -5.10    2.70
  -3  -9   2    1.70    3.20
   2   9  -2  203.78   18.20
  -2  -9   2  199.88   11.20
   1   9  -2  304.87   21.20
  -1  -9   2  314.67   15.60
  -1  -9   2  325.17   15.60
   0   9  -2    6.10    4.30
   0   9  -2    1.80    3.80
   0  -9   2    8.40    4.50
   0  -9   2    5.50    4.50
  -1   9  -2   11.40    5.70
  -1   9  -2    9.80    4.30
   1  -9   2   12.50    4.60
  -2   9  -2    5.30    4.00
  -3   9  -2  387.26   22.40
  -3   9  -2  419.26   22.10
  -4   9  -2  109.79   11.90
  -4   9  -2   91.09   12.50
  -5   9  -2    9.70    6.10
  -5   9  -2   15.00    5.40
  -6   9  -2  154.28   14.00
   7   8  -2   -0.80    4.80
  -7  -8   2   -8.10    3.20
   6   8  -2   22.30    8.30
  -6  -8   2   20.80    4.10
  -6  -8   2   13.40    4.20
   5   8  -2   20.90    7.70
  -5  -8   2   21.20    3.90
  -5  -8   2   15.60    3.50
   4   8  -2   27.20    7.90
  -4  -8   2   42.10    4.70
  -4  -8   2   31.20    4.60
   3   8  -2  170.78   15.80
  -3  -8   2  165.98    8.70
  -3  -8   2  164.38    9.10
   2   8  -2  100.69   13.40
  -2  -8   2  115.29    7.70
  -2  -8   2  116.29    8.00
   1   8  -2  116.19   12.50
  -1  -8   2  109.39    8.20
   0   8  -2  310.07   15.10
   0   8  -2  303.77   19.40
   0  -8   2  287.57   14.60
   0  -8   2  318.47   15.40
  -1   8  -2    5.40    5.00
  -1   8  -2    3.80    3.20
   1  -8   2   -4.50    2.70
  -2   8  -2  385.16   19.10
  -2   8  -2  389.06   21.20
  -3   8  -2  562.24   24.70
  -3   8  -2  495.35   24.00
  -4   8  -2  184.38   14.70
  -4   8  -2  176.88   13.60
   4  -8   2  168.58   12.30
  -5   8  -2   23.00    6.10
  -5   8  -2   37.10    8.00
   5  -8   2   27.50    5.50
  -6   8  -2  117.59   13.30
   6  -8   2   99.69   11.20
  -7   8  -2   87.49   14.00
   8   7  -2  134.69   17.70
  -8  -7   2  159.38   10.90
   7   7  -2   11.40    3.90
   7   7  -2    3.90    6.00
  -7  -7   2   -0.50    3.00
  -7  -7   2    2.80    3.90
   6   7  -2   10.50    6.60
   6   7  -2    6.00    3.10
  -6  -7   2   11.60    3.20
  -6  -7   2   18.90    3.90
   5   7  -2   25.10    8.10
  -5  -7   2   22.20    3.50
  -5  -7   2   23.30    3.80
   4   7  -2    3.70    5.00
  -4  -7   2    3.20    2.20
   3   7  -2  116.19   12.20
  -3  -7   2  115.99    6.60
  -3  -7   2  122.89    7.10
   2   7  -2    4.50    4.40
  -2  -7   2    2.50    2.00
  -2  -7   2    3.80    2.30
   1   7  -2   31.60    6.90
   1   7  -2   32.10    5.00
  -1  -7   2   32.80    5.00
  -1  -7   2   33.30    4.80
   0   7  -2   87.39    7.60
   0   7  -2   76.69   10.90
   0  -7   2   99.49    7.80
  -1   7  -2    4.50    3.80
  -1   7  -2    3.40    2.80
   1  -7   2    0.40    3.50
   1  -7   2   -1.80    2.90
  -2   7  -2    1.10    3.50
  -2   7  -2    2.40    3.00
   2  -7   2    1.70    3.10
   2  -7   2   -3.80    2.30
  -3   7  -2   55.99    8.40
  -3   7  -2   54.09    8.20
   3  -7   2   51.19    7.60
  -4   7  -2    3.40    3.80
  -4   7  -2    4.00    3.90
   4  -7   2    5.90    3.20
  -5   7  -2    2.90    4.30
   5  -7   2   -1.50    2.70
  -6   7  -2   -1.70    3.00
  -6   7  -2   -8.10    2.80
  -6   7  -2    3.90    3.90
  -7   7  -2    0.20    4.60
  -8   7  -2   32.40    8.60
   9   6  -2  130.09   16.50
  -9  -6   2  161.48   12.20
   8   6  -2   61.09   11.80
  -8  -6   2   59.29    7.50
   7   6  -2   28.20    7.90
   7   6  -2   19.20    4.00
  -7  -6   2   18.00    4.30
   6   6  -2   48.60    5.20
  -6  -6   2   58.79    5.60
   5   6  -2  105.89   11.80
   5   6  -2   95.89    6.20
  -5  -6   2   81.39    5.90
  -5  -6   2   86.99    5.80
   4   6  -2  282.47   18.10
  -4  -6   2  266.17   10.10
  -4  -6   2  283.37    9.90
   3   6  -2  169.38   13.30
  -3  -6   2  135.99    6.70
  -3  -6   2  148.69    6.60
   2   6  -2  244.98   15.80
  -2  -6   2  213.18    9.10
  -2  -6   2  229.78    9.00
   1   6  -2  244.18   15.40
   1   6  -2  216.58    9.80
  -1  -6   2  240.08   10.40
  -1  -6   2  228.98    9.80
  -1  -6   2  214.28   14.00
   0   6  -2    7.10    3.50
   0   6  -2   11.70    3.40
   0  -6   2    9.80    2.90
   0  -6   2    5.20    3.70
  -1   6  -2   24.80    5.70
   1  -6   2   34.50    5.40
  -2   6  -2   98.29    8.60
  -2   6  -2  107.69    9.50
   2  -6   2  103.69    8.80
  -3   6  -2   32.80    6.60
  -3   6  -2   26.50    5.90
   3  -6   2   44.70    7.80
   3  -6   2   28.40    5.30
  -4   6  -2  356.16   16.10
  -4   6  -2  392.16   19.90
   4  -6   2  371.26   16.00
  -5   6  -2    0.30    3.00
  -5   6  -2    1.30    4.90
   5  -6   2    5.70    2.70
  -6   6  -2   -0.30    2.70
  -6   6  -2    6.50    2.50
  -6   6  -2    7.70    2.50
  -7   6  -2    3.50    3.40
  -8   6  -2    6.00    6.40
   9   5  -2  -10.40    3.80
  -9  -5   2    1.40    3.80
   8   5  -2  129.09   10.50
  -8  -5   2  137.09   10.10
   7   5  -2   33.70    5.50
   7   5  -2   21.00    6.80
   6   5  -2   29.40    7.30
   6   5  -2   27.80    4.50
  -6  -5   2   25.40    4.40
   5   5  -2  585.04   17.70
   5   5  -2  594.54   26.40
  -5  -5   2  596.94   17.90
   4   5  -2  113.39    5.70
   4   5  -2  113.49   11.20
  -4  -5   2  102.09    9.60
  -4  -5   2  106.69    5.60
  -4  -5   2  117.19    5.70
   3   5  -2  156.68   11.90
  -3  -5   2  145.79    6.20
  -3  -5   2  148.59    5.90
  -3  -5   2  142.39   11.30
   2   5  -2   71.99    8.10
  -2  -5   2   83.79    4.50
  -2  -5   2   90.79    4.80
  -2  -5   2   85.09    8.50
   1   5  -2   21.40    5.40
   1   5  -2   38.80    3.70
  -1  -5   2   29.90    3.50
  -1  -5   2   27.10    5.80
  -1  -5   2   26.00    3.50
   0   5  -2   88.59    8.60
   0   5  -2  101.69    6.40
   0  -5   2  101.79    6.60
   0  -5   2   95.99    8.20
  -1   5  -2  402.06   17.40
  -1   5  -2  401.16   15.30
   1  -5   2  398.26   15.30
   1  -5   2  378.36   16.60
  -2   5  -2   26.40    4.90
  -2   5  -2   24.20    4.80
   2  -5   2   47.40    6.40
   2  -5   2   27.20    4.80
  -3   5  -2   33.00    5.90
  -3   5  -2   28.60    5.00
   3  -5   2   26.60    5.50
   3  -5   2   27.80    4.80
  -4   5  -2   44.30    5.50
  -4   5  -2   40.10    7.30
   4  -5   2   49.90    5.30
  -5   5  -2  180.48   13.80
  -5   5  -2  201.68    9.10
  -6   5  -2  343.67    8.60
  -6   5  -2  335.27   20.20
  -7   5  -2   14.90    6.20
  -8   5  -2   27.40    8.10
  -9   5  -2   22.90    6.80
 -10  -4   2  109.69   11.50
   9   4  -2   33.50    8.10
  -9  -4   2   47.10    8.30
   8   4  -2   44.00    7.20
   8   4  -2   23.20    6.90
  -8  -4   2   33.40    6.80
   7   4  -2   44.90    7.90
   7   4  -2   61.39    7.70
  -7  -4   2   54.29    7.10
   6   4  -2  829.12   25.10
   6   4  -2  882.71   32.00
  -6  -4   2  845.72   25.10
  -6  -4   2  852.11   30.90
   5   4  -2   -1.60    1.70
   5   4  -2    0.10    3.30
  -5  -4   2   -6.80    2.40
  -5  -4   2   -1.70    1.50
   4   4  -2 1227.98   28.80
   4   4  -2 1245.28   38.10
  -4  -4   2 1221.88   41.30
  -4  -4   2 1215.28   28.80
   3   4  -2  444.26   19.40
   3   4  -2  424.46   11.30
  -3  -4   2  419.36   11.20
  -3  -4   2  413.26   11.10
  -3  -4   2  422.96   18.50
  -2  -4   2  469.65   11.60
  -2  -4   2  485.35   12.00
  -2  -4   2  456.95   18.90
   1   4  -2 1424.46   38.70
   1   4  -2 1379.16   30.90
  -1  -4   2 1344.77   37.80
  -1  -4   2 1373.06   30.80
   0   4  -2  164.58    7.50
   0   4  -2  176.88   10.50
   0  -4   2  160.18    7.60
   0  -4   2  150.38    9.40
  -1   4  -2  767.02   24.00
  -1   4  -2  778.62   22.60
   1  -4   2  729.73   22.20
   1  -4   2  785.72   23.80
  -2   4  -2 1601.54   41.80
  -2   4  -2 1705.93   41.10
   2  -4   2 1570.64   40.20
   2  -4   2 1606.74   41.90
  -3   4  -2 2107.99   47.60
  -3   4  -2 1934.41   51.49
   3  -4   2 2074.19   47.40
   3  -4   2 1898.11   51.39
  -4   4  -2   30.70    3.90
  -4   4  -2   38.40    6.80
  -4   4  -2   37.40    4.50
   4  -4   2   34.00    4.30
   4  -4   2   40.60    7.00
  -5   4  -2  398.36   12.00
  -5   4  -2  431.06   12.50
  -5   4  -2  424.36   20.70
  -7   4  -2   23.70    7.50
  -8   4  -2    9.80    5.30
  -9   4  -2    4.00    4.60
  10   3  -2   22.40    6.10
 -10  -3   2   27.30    7.40
   9   3  -2   33.20    8.10
  -9  -3   2   31.50    7.90
  -9  -3   2   53.49    8.20
   8   3  -2  292.77   16.50
   8   3  -2  307.97   17.40
  -8  -3   2  283.57   16.40
  -8  -3   2  321.37   16.50
   7   3  -2  430.66   20.00
   7   3  -2  450.05   18.70
  -7  -3   2  470.45   18.70
  -7  -3   2  395.36   19.10
   6   3  -2  213.98   13.40
   6   3  -2  202.98   10.90
  -6  -3   2  213.98   12.80
  -6  -3   2  215.18   11.00
   5   3  -2 1355.76   34.10
   5   3  -2 1353.96   39.20
  -5  -3   2 1349.36   38.80
  -5  -3   2 1349.07   33.80
   4   3  -2  256.47   13.40
   4   3  -2  268.67    9.60
  -4  -3   2  275.27   13.60
  -4  -3   2  246.38    9.20
   3   3  -2  140.99    9.50
   3   3  -2  140.89    5.30
  -3  -3   2  153.58    5.40
  -3  -3   2  150.38    9.60
   2   3  -2  334.97   14.60
  -2  -3   2  358.66   14.80
  -2  -3   2  335.47    7.50
   1   3  -2    1.60    0.90
   1   3  -2    4.50    2.90
  -1  -3   2    5.00    2.20
  -1  -3   2    4.50    1.20
   0   3  -2 1019.50   24.10
   0   3  -2 1009.60   27.70
   0  -3   2 1003.00   27.40
   0  -3   2  957.50   23.90
  -1   3  -2   16.70    3.50
  -1   3  -2   18.60    3.40
   1  -3   2   17.40    3.40
   1  -3   2   16.70    3.20
  -2   3  -2 2817.32   65.69
  -2   3  -2 2839.32   62.99
   2  -3   2 2924.01   63.29
   2  -3   2 2947.80   66.09
  -3   3  -2 3031.30   64.89
  -3   3  -2 2983.10   64.39
  -3   3  -2 3014.90   71.19
   3  -3   2 2990.30   71.09
   3  -3   2 3076.19   65.19
  -4   3  -2  146.79    6.60
  -4   3  -2  143.99    6.40
  -4   3  -2  144.59   10.80
   4  -3   2  141.09   10.40
  -5   3  -2   93.49    4.10
  -5   3  -2  110.89   10.40
  -6   3  -2  324.57   19.00
  -7   3  -2  146.29   13.30
  -8   3  -2   71.69   11.70
  -9   3  -2  357.36   23.50
 -10   3  -2   17.70    6.50
  10   2  -2   18.30    5.50
 -10  -2   2   30.00    7.80
   9   2  -2   51.99    7.60
  -9  -2   2   56.89    8.20
  -9  -2   2   60.29    9.00
   8   2  -2    2.70    3.60
  -8  -2   2    3.10    3.50
  -8  -2   2    4.30    3.40
   7   2  -2 1403.76   41.20
  -7  -2   2 1429.96   40.30
   6   2  -2  276.47   13.60
   6   2  -2  284.57   14.00
  -6  -2   2  311.27   13.90
  -6  -2   2  286.97   13.80
   5   2  -2   12.20    3.30
   5   2  -2    8.40    2.90
  -5  -2   2    6.40    2.40
  -5  -2   2   10.90    3.20
   4   2  -2   87.79    7.20
   4   2  -2   95.69    5.90
  -4  -2   2   94.59    7.10
  -4  -2   2   90.29    5.70
   3   2  -2 1103.29   29.70
   3   2  -2 1034.40   24.40
  -3  -2   2 1076.79   29.20
  -3  -2   2 1081.39   24.40
   2   2  -2 4812.52  170.88
  -2  -2   2 4751.52  175.08
   1   2  -2 9719.83  269.67
  -1  -2   2 9999.00  274.77
   0   2  -2  142.09    7.30
   0   2  -2  143.89    5.80
   0  -2   2  144.59    7.30
   0  -2   2  136.19    5.70
  -1   2  -2   13.10    2.70
  -1   2  -2   10.50    2.40
   1  -2   2   10.90    2.60
   1  -2   2   11.90    2.60
  -2   2  -2  495.05   14.50
  -2   2  -2  485.65   14.20
  -2   2  -2  495.95   17.10
   2  -2   2  503.35   14.80
   2  -2   2  486.85   16.90
  -3   2  -2  400.06   16.50
  -3   2  -2  407.06   12.30
  -3   2  -2  406.96   12.50
   3  -2   2  433.36   17.00
  -4   2  -2    2.00    1.50
  -4   2  -2    3.30    1.40
  -4   2  -2    0.90    2.50
   4  -2   2    9.10    4.20
  -5   2  -2    1.40    1.20
  -5   2  -2    1.90    3.40
  -5   2  -2    0.90    0.90
   5  -2   2    2.10    2.40
  -6   2  -2   19.80    6.10
  -7   2  -2  214.28   15.70
  -8   2  -2   12.40    5.30
  -9   2  -2   12.20    6.00
 -10   2  -2  139.69   15.90
 -11  -1   2   81.89   12.10
  10   1  -2  258.87   11.00
 -10  -1   2  268.87   18.00
   9   1  -2    0.80    2.70
   9   1  -2   -3.90    2.20
  -9  -1   2   -0.50    3.10
  -9  -1   2   -2.50    3.70
   8   1  -2  660.73   21.90
  -8  -1   2  714.33   27.20
  -8  -1   2  651.13   21.60
   7   1  -2 1205.78   36.90
  -7  -1   2 1141.39   31.80
  -7  -1   2 1190.58   36.20
   6   1  -2  871.51   25.50
   6   1  -2  902.11   28.40
  -6  -1   2  877.71   25.40
  -6  -1   2  873.21   27.60
   5   1  -2  975.90   28.40
   5   1  -2 1008.80   27.40
  -5  -1   2  972.10   27.20
  -5  -1   2 1013.30   28.20
   4   1  -2 1394.26   34.40
   4   1  -2 1428.66   34.90
  -4  -1   2 1384.26   34.00
  -4  -1   2 1380.36   34.70
   3   1  -2  894.21   21.90
   3   1  -2  911.01   23.90
  -3  -1   2  830.82   23.40
  -3  -1   2  872.91   21.60
   2   1  -2 8605.14  231.68
   2   1  -2 8538.75  225.08
   1   1  -2 2068.79   45.90
  -1  -1   2 2049.20   45.80
  -1  -1   2 2060.09   41.80
  -1   1  -2  499.55   15.10
  -1   1  -2  503.35   14.50
  -1   1  -2  508.15   14.30
   1  -1   2  530.55   15.40
   1  -1   2  500.35   14.10
  -2   1  -2  258.67   11.20
  -2   1  -2  243.78    8.80
  -2   1  -2  247.28    9.00
   2  -1   2  259.77   11.20
   2  -1   2  256.77    8.80
  -3   1  -2 1216.28   33.50
  -3   1  -2 1164.18   28.20
  -3   1  -2 1192.08   28.40
   3  -1   2 1194.78   33.40
   3  -1   2 1205.78   28.00
  -4   1  -2  673.23   18.00
  -4   1  -2  652.13   23.90
   4  -1   2  658.33   17.50
   4  -1   2  663.33   23.80
  -5   1  -2  999.00   34.00
  -5   1  -2 1078.09   25.80
  -5   1  -2 1071.79   25.80
   5  -1   2 1069.09   25.40
   5  -1   2 1070.09   34.90
  -6   1  -2  138.49    6.10
  -6   1  -2  113.39   10.50
  -6   1  -2  128.69    6.00
   6  -1   2  141.79    6.00
  -7   1  -2   64.49    3.30
  -8   1  -2   -1.60    2.70
  -9   1  -2  192.78   16.90
 -10   1  -2  131.59   14.60
 -11   0   2  153.48   14.80
 -10   0   2  -10.80    3.70
   9   0  -2    0.10    1.00
  -9   0   2    1.50    3.90
   8   0  -2    4.20    2.00
   8   0  -2    4.00    2.20
  -8   0   2    7.40    4.50
   7   0  -2   -1.90    1.60
   7   0  -2    0.50    1.70
   7   0  -2   -0.20    3.30
  -7   0   2   -0.30    1.60
  -7   0   2    5.10    3.60
   6   0  -2   18.60    4.70
   6   0  -2   25.90    3.50
   6   0  -2   26.00    3.60
  -6   0   2   32.80    6.00
  -6   0   2   24.60    3.60
   5   0  -2 1493.15   34.70
   5   0  -2 1460.65   34.90
   5   0  -2 1536.45   39.90
  -5   0   2 1446.16   35.00
  -5   0   2 1530.95   39.60
   4   0  -2  238.38    8.80
   4   0  -2  211.78   10.20
   4   0  -2  221.38    8.80
  -4   0   2  223.98    9.00
  -4   0   2  235.88   10.70
   3   0  -2 3325.27   70.09
   3   0  -2 3385.06   70.59
   3   0  -2 3385.46   71.59
  -3   0   2 3331.37   70.59
   2   0  -2 1035.50   24.60
   2   0  -2 1088.99   25.30
   2   0  -2 1069.89   25.50
  -2   0   2 1015.00   25.30
  -2   0   2 1048.70   24.70
   1   0  -2 8582.64  177.58
  -1   0   2 7696.23  174.08
   0   0  -2 2013.40   44.20
   0   0   2 2037.80   44.30
  -1   0  -2    1.60    1.80
  -1   0  -2    2.10    1.60
   1   0   2    3.60    1.90
   1   0   2    2.90    2.20
  -2   0  -2  580.74   16.70
  -2   0  -2  589.64   18.40
   2   0   2  567.24   18.30
   2   0   2  574.04   16.50
  -3   0  -2  591.34   20.60
  -3   0  -2  602.84   17.80
   3   0   2  575.64   20.30
   3   0   2  613.84   17.70
  -4   0  -2  597.64   18.20
  -4   0  -2  584.34   22.20
   4   0   2  611.14   22.40
   4   0   2  599.14   18.10
  -5   0  -2  391.86   18.80
  -5   0  -2  449.46   16.50
   5   0   2  409.56   14.40
   5   0   2  410.36   19.20
  -6   0  -2  766.12   22.00
  -6   0  -2  748.23   29.20
   6   0   2  751.62   21.90
  -7   0  -2  545.45   17.50
  -7   0  -2  570.74   26.00
   7   0   2  571.34   17.70
  -8   0  -2  253.67   17.50
   8   0   2  225.78    9.50
  -9   0  -2   81.79   12.90
  -9   0  -2   90.29    4.60
 -10   0  -2   49.70   10.70
 -11   1   2   52.49   12.80
 -10   1   2   48.90   10.20
  -9   1   2    6.10    3.80
  -8   1   2   44.10    8.50
  -7   1   2  533.05   23.00
   6  -1  -2  816.82   19.50
   6  -1  -2  806.82   28.40
   6  -1  -2  852.71   19.70
  -6   1   2  840.42   28.60
   5  -1  -2    0.80    1.30
   5  -1  -2    0.90    1.30
   5  -1  -2   -1.10    1.60
  -5   1   2    2.80    2.60
   4  -1  -2  344.37   14.30
   4  -1  -2  337.27   10.60
   4  -1  -2  338.37   10.50
  -4   1   2  336.37   13.80
   3  -1  -2 1445.86   32.20
   3  -1  -2 1398.66   34.90
   3  -1  -2 1413.56   32.30
  -3   1   2 1377.36   34.90
  -3   1   2 1420.76   31.90
   2  -1  -2  474.95   14.60
   2  -1  -2  482.55   13.90
  -2   1   2  476.65   13.70
  -2   1   2  475.45   14.60
   1  -1  -2 1277.07   30.30
   1  -1  -2 1301.87   30.70
   1  -1  -2 1291.77   30.70
  -1   1   2 1314.87   30.50
  -1   1   2 1309.07   30.80
  -1   1   2 1308.27   30.60
   0  -1  -2 1252.07   29.20
   0  -1  -2 1196.38   29.80
   0   1   2 1235.28   29.20
   0   1   2 1221.78   29.90
  -1  -1  -2  923.71   23.90
  -1  -1  -2  887.21   24.00
   1   1   2  899.81   23.90
   1   1   2  888.01   24.10
  -2  -1  -2 1040.30   27.50
  -2  -1  -2  908.81   28.40
   2   1   2  998.20   26.80
   2   1   2 1009.30   27.20
  -3  -1  -2    8.30    3.20
  -3  -1  -2   10.90    3.10
   3   1   2    9.10    3.20
   3   1   2   12.00    3.70
  -4  -1  -2 1352.76   36.10
  -4  -1  -2 1421.16   39.50
   4   1   2 1404.76   39.40
   4   1   2 1413.86   36.70
  -5  -1  -2    2.00    2.50
  -5  -1  -2    1.70    3.30
   5   1   2    1.20    3.40
   5   1   2    3.20    2.70
  -6  -1  -2  789.62   24.60
  -6  -1  -2  743.23   28.90
   6   1   2  744.13   24.50
  -7  -1  -2   24.70    6.10
  -7  -1  -2   24.90    5.00
   7   1   2   32.40    5.60
  -8  -1  -2   29.20    5.60
  -8  -1  -2   57.19   10.30
   8   1   2   38.10    6.00
  -9  -1  -2  180.58   16.00
   9   1   2  145.59    9.40
 -10  -1  -2  148.49   21.70
 -10   2   2   -2.00    4.10
  -9   2   2  141.99   13.30
  -8   2   2  165.88   13.20
  -7   2   2  340.77   18.20
   6  -2  -2 1250.87   39.00
  -6   2   2 1280.37   39.00
   5  -2  -2    8.80    1.70
   5  -2  -2    8.70    1.70
  -5   2   2    7.40    3.00
   4  -2  -2 1802.02   39.90
   4  -2  -2 1827.22   40.00
   4  -2  -2 1831.72   46.20
  -4   2   2 1746.43   39.30
   3  -2  -2 2527.05   55.59
   3  -2  -2 2623.34   59.59
  -3   2   2 2520.55   59.29
  -3   2   2 2619.54   55.59
   2  -2  -2  293.57   10.90
   2  -2  -2  293.17   11.70
  -2   2   2  288.97   11.80
  -2   2   2  290.57   10.90
   1  -2  -2   15.10    2.80
   1  -2  -2   15.70    3.30
   1  -2  -2   17.20    3.10
  -1   2   2   14.60    3.20
  -1   2   2   25.30    3.80
   0  -2  -2   32.30    4.70
   0  -2  -2   38.50    3.90
   0  -2  -2   29.00    3.90
   0   2   2   30.60    3.50
   0   2   2   36.10    4.80
  -1  -2  -2 1049.70   28.00
  -1  -2  -2 1079.29   29.40
   1   2   2 1109.79   29.80
   1   2   2 1051.89   27.90
  -2  -2  -2  157.48    9.00
  -2  -2  -2  163.08    9.50
   2   2   2  148.89    8.60
   2   2   2  150.48    9.50
  -3  -2  -2 1014.90   29.90
  -3  -2  -2 1028.00   30.00
   3   2   2 1004.30   29.60
   3   2   2 1011.40   30.10
  -4  -2  -2 1289.67   35.80
  -4  -2  -2 1240.18   36.20
   4   2   2 1258.87   35.90
   4   2   2 1206.48   35.90
  -5  -2  -2   48.90    7.10
  -5  -2  -2   52.59    7.60
   5   2   2   57.99    8.20
   5   2   2   52.99    8.30
  -6  -2  -2  162.98   10.80
  -6  -2  -2  137.39   11.80
   6   2   2  131.19   10.20
  -7  -2  -2  151.88   13.20
  -7  -2  -2  148.69   11.30
   7   2   2  162.48   11.70
  -8  -2  -2   26.20    7.00
  -8  -2  -2   26.60    7.20
   8   2   2   21.80    5.50
  -9  -2  -2  201.98   16.90
   9   2   2  162.68   12.60
 -10   3   2   -3.80    5.20
  -9   3   2   20.00    6.60
  -8   3   2  224.18   16.40
  -7   3   2  542.05   24.70
  -6   3   2  371.86   18.90
   5  -3  -2   55.19    4.00
   5  -3  -2   49.99    3.70
   5  -3  -2   49.60    7.60
  -5   3   2   52.39    3.70
  -5   3   2   43.10    7.20
   4  -3  -2    3.10    2.00
   4  -3  -2    2.40    2.20
  -4   3   2    2.20    2.70
  -4   3   2    1.60    1.80
   3  -3  -2   49.60    6.50
  -3   3   2   40.60    6.20
  -3   3   2   46.50    6.00
   2  -3  -2  440.46   16.40
   2  -3  -2  440.26   15.70
  -2   3   2  488.85   16.60
  -2   3   2  435.16   16.50
   1  -3  -2  598.44   19.70
   1  -3  -2  583.24   19.40
   1  -3  -2  592.14   18.90
  -1   3   2  599.34   19.80
  -1   3   2  577.04   19.00
   0  -3  -2 3459.45   74.99
   0  -3  -2 3239.38   72.39
   0  -3  -2 3261.97   71.99
   0   3   2 3151.48   74.19
   0   3   2 3272.47   72.49
  -1  -3  -2   78.79    6.40
  -1  -3  -2   79.39    7.40
   1   3   2   78.09    7.70
   1   3   2   81.79    6.40
  -2  -3  -2  509.05   19.80
  -2  -3  -2  519.45   18.40
   2   3   2  512.55   18.10
   2   3   2  497.75   20.10
  -3  -3  -2 1119.59   34.10
  -3  -3  -2 1139.59   32.90
   3   3   2 1114.99   32.30
   3   3   2 1133.39   35.20
  -4  -3  -2   23.20    5.10
  -4  -3  -2   24.70    5.50
   4   3   2   25.20    5.30
   4   3   2   16.80    5.20
  -5  -3  -2    6.10    3.20
  -5  -3  -2    3.80    4.10
   5   3   2    2.90    3.40
   5   3   2    4.20    3.90
  -6  -3  -2   69.99    9.70
  -6  -3  -2   85.89   10.50
   6   3   2   76.39   10.20
  -7  -3  -2  288.07   16.90
  -7  -3  -2  299.07   18.20
   7   3   2  291.87   17.30
  -8  -3  -2   84.89   12.30
   8   3   2   74.29   10.20
  -9  -3  -2    5.60    5.40
   9   3   2    9.60    5.40
 -10   4   2   13.60    7.10
  -9   4   2   73.29   12.50
  -8   4   2   69.89   11.40
  -7   4   2  575.54   26.60
   6  -4  -2  451.75   12.20
   6  -4  -2  453.55   12.40
  -6   4   2  435.56   12.00
  -6   4   2  440.56   21.70
   5  -4  -2    0.60    1.60
  -5   4   2    3.00    1.90
  -5   4   2    1.90    2.70
   4  -4  -2  635.34   24.00
   4  -4  -2  646.14   20.10
  -4   4   2  647.74   24.30
  -4   4   2  649.34   20.30
   3  -4  -2  296.67   14.50
   3  -4  -2  278.67   12.50
  -3   4   2  285.37   12.90
  -3   4   2  297.87   14.80
   2  -4  -2  605.04   21.10
   2  -4  -2  574.54   20.40
  -2   4   2  585.24   21.40
  -2   4   2  628.44   21.40
   1  -4  -2  938.11   27.50
   1  -4  -2  925.61   28.00
   1  -4  -2  875.91   28.10
  -1   4   2  924.91   27.70
  -1   4   2  912.21   28.90
   0  -4  -2 1799.92   47.70
   0  -4  -2 1848.52   45.80
   0  -4  -2 1816.22   45.20
   0   4   2 1790.62   48.30
   0   4   2 1818.82   45.50
  -1  -4  -2  118.79    9.60
  -1  -4  -2  131.59    8.70
  -1  -4  -2  116.29    8.10
   1   4   2  130.19   10.60
   1   4   2  127.49    8.60
  -2  -4  -2    5.20    3.00
  -2  -4  -2   11.60    4.40
   2   4   2   16.80    4.90
   2   4   2    5.60    3.20
  -3  -4  -2   56.29    6.60
  -3  -4  -2   54.49    8.10
   3   4   2   70.79    8.10
   3   4   2   65.99    6.70
  -4  -4  -2  378.66   17.60
  -4  -4  -2  356.36   18.60
   4   4   2  401.66   20.00
  -5  -4  -2   39.70    7.40
   5   4   2   32.50    6.60
   5   4   2   27.90    6.60
  -6  -4  -2   17.50    5.20
   6   4   2   12.50    5.00
  -7  -4  -2  183.58   14.30
   7   4   2  191.48   14.90
  -8  -4  -2   28.40    8.00
   8   4   2   25.50    7.40
  -9  -4  -2  -12.20    3.70
   9   4   2   -4.30    3.80
 -10   5   2    2.90    4.60
  -9   5   2   23.80    8.20
  -8   5   2   20.20    6.50
  -7   5   2  325.97   20.30
   6  -5  -2   52.19    7.20
  -6   5   2   58.09    5.00
  -6   5   2   66.79   12.30
   5  -5  -2   31.80    5.00
  -5   5   2   43.40    5.80
  -5   5   2   39.00    7.10
   4  -5  -2  395.36   15.80
  -4   5   2  372.06   16.00
  -4   5   2  366.76   18.50
   3  -5  -2   17.10    4.50
   3  -5  -2   14.30    4.30
  -3   5   2    9.50    3.90
  -3   5   2   13.80    4.20
   2  -5  -2  128.49    9.70
   2  -5  -2  150.88   10.40
   2  -5  -2  131.89   11.00
  -2   5   2  126.09    9.90
  -2   5   2  136.09   10.50
   1  -5  -2   34.10    5.80
   1  -5  -2   28.90    5.80
   1  -5  -2   20.90    5.30
  -1   5   2   33.60    6.60
  -1   5   2   26.60    5.20
   0  -5  -2  557.24   20.00
   0  -5  -2  514.15   24.70
   0  -5  -2  566.64   20.70
   0   5   2  487.15   21.80
  -1  -5  -2  611.74   21.50
  -1  -5  -2  599.24   24.50
  -1  -5  -2  620.44   22.10
   1   5   2  658.93   22.30
   1   5   2  580.14   24.90
  -2  -5  -2  948.21   32.90
  -2  -5  -2  869.91   28.10
  -2  -5  -2  912.81   28.90
   2   5   2  878.51   28.60
   2   5   2  930.61   33.40
  -3  -5  -2  315.47   15.60
   3   5   2  313.67   15.30
   3   5   2  310.87   18.20
  -4  -5  -2  261.07   15.00
   4   5   2  276.07   17.80
   4   5   2  268.57   14.70
  -5  -5  -2  890.61   32.00
   5   5   2  977.00   36.90
  -6  -5  -2  633.24   26.50
   6   5   2  629.54   29.40
   7   5   2   49.99    9.20
  -8  -5  -2   12.80    6.10
   8   5   2    8.90    5.20
  -9  -5  -2   -1.30    6.30
   9   5   2   17.50    7.10
  -9   6   2  108.89   15.70
  -8   6   2   55.49   10.20
   7  -6  -2  181.98    7.50
  -7   6   2  179.38    7.40
  -7   6   2  211.78   16.90
   6  -6  -2   98.79    7.40
  -6   6   2  110.79   11.60
  -6   6   2   95.29    7.90
   5  -6  -2  334.37   15.40
  -5   6   2  375.96   16.50
   4  -6  -2 1409.26   39.80
  -4   6   2 1408.66   40.40
  -4   6   2 1333.37   43.30
   3  -6  -2  114.99    9.50
  -3   6   2   97.09    9.40
  -3   6   2  109.79   10.30
   2  -6  -2   90.79    8.70
   2  -6  -2   97.89    9.50
   2  -6  -2   86.99    8.90
  -2   6   2   93.39    9.10
  -2   6   2  102.89    9.80
   1  -6  -2  124.99   10.40
   1  -6  -2  112.59    9.00
   1  -6  -2  119.19    9.70
  -1   6   2  125.29   10.80
  -1   6   2  129.79   10.20
   0  -6  -2    9.70    3.40
   0  -6  -2   12.60    4.50
   0  -6  -2    6.60    3.30
   0   6   2    3.70    4.00
  -1  -6  -2   42.50    7.40
  -1  -6  -2   48.30    7.30
   1   6   2   49.10    8.70
  -2  -6  -2   65.79    7.20
  -2  -6  -2   86.19    8.40
   2   6   2   54.29    7.50
   2   6   2   63.89   10.20
  -3  -6  -2  803.62   29.00
  -3  -6  -2  875.01   29.20
   3   6   2  898.11   35.50
   3   6   2  843.92   29.20
  -4  -6  -2  149.99   12.20
   4   6   2  140.29   11.10
   4   6   2  158.38   14.90
  -5  -6  -2  120.49   11.00
   5   6   2  157.08   15.00
  -6  -6  -2   23.00    6.30
   6   6   2   27.70    8.20
  -7  -6  -2   86.39   11.50
   7   6   2   76.29   12.30
  -8  -6  -2   43.90    9.30
   8   6   2   46.00   10.80
  -8   7   2  110.49   15.30
   7  -7  -2    6.70    2.60
  -7   7   2    0.00    2.80
  -7   7   2    4.00    5.30
   6  -7  -2    6.70    3.30
  -6   7   2    2.40    3.00
  -5   7   2  186.78   14.90
  -5   7   2  159.48   11.90
   4  -7  -2  451.25   20.80
  -4   7   2  501.75   22.50
   3  -7  -2  241.38   15.40
   3  -7  -2  246.08   16.50
  -3   7   2  253.37   16.20
  -3   7   2  237.78   15.60
   2  -7  -2  195.58   14.10
  -2   7   2  197.88   13.60
  -2   7   2  200.78   14.70
   1  -7  -2  969.80   34.00
  -1   7   2 1006.10   33.90
  -1   7   2  965.20   36.20
   0  -7  -2   56.59    8.10
   0  -7  -2   57.79    8.50
   0   7   2   55.99    9.70
  -1  -7  -2   80.09    8.40
  -1  -7  -2   92.49    9.20
   1   7   2   84.79   12.00
  -2  -7  -2 2039.00   54.59
  -2  -7  -2 2069.39   55.49
   2   7   2 2013.60   63.59
   2   7   2 2045.90   55.19
  -3  -7  -2  731.03   27.30
  -3  -7  -2  701.63   29.90
   3   7   2  615.24   30.90
  -4  -7  -2  261.17   15.80
   4   7   2  248.88   19.10
  -5  -7  -2    9.20    5.10
   5   7   2    8.40    5.80
  -6  -7  -2   24.90    6.70
   6   7   2   18.40    7.50
  -7  -7  -2  117.39   12.40
   7   7   2  111.49   16.20
  -8   8   2    0.90    5.30
  -7   8   2    4.00    6.50
   6  -8  -2   38.70    7.00
  -6   8   2   51.99   10.70
  -6   8   2   31.50    7.10
  -5   8   2  230.78   17.20
  -5   8   2  200.38   14.50
  -4   8   2   73.89   10.90
  -4   8   2   79.29   10.70
   3  -8  -2   -7.90    3.10
  -3   8   2    5.20    3.90
  -3   8   2    6.00    4.70
   2  -8  -2   13.30    4.70
  -2   8   2   12.90    5.40
  -2   8   2   15.40    6.20
   1  -8  -2    7.80    4.90
  -1   8   2   10.70    5.10
  -1   8   2    5.40    4.60
   0  -8  -2  130.29   11.70
   0   8   2  130.69   14.00
  -1  -8  -2  347.97   18.60
   1   8   2  341.47   22.20
  -2  -8  -2   25.10    6.40
   2   8   2   15.60    6.70
  -3  -8  -2   21.80    6.30
   3   8   2   -0.20    4.70
  -4  -8  -2   27.30    6.90
   4   8   2   33.70    9.50
  -5  -8  -2    0.70    4.30
   5   8   2   -0.50    5.70
  -6  -8  -2   66.39   11.00
   6   8   2   91.49   15.50
  -7   9   2   68.49   12.60
  -6   9   2   45.20    9.80
  -6   9   2   42.10    8.80
  -5   9   2   21.70    7.60
  -5   9   2   18.30    6.20
   4  -9  -2   89.99   13.70
  -4   9   2  103.49   11.60
  -4   9   2   84.29   11.90
   3  -9  -2   44.00    9.20
  -3   9   2   49.20    9.40
  -3   9   2   41.30    9.20
   2  -9  -2  369.66   21.90
  -2   9   2  382.76   23.50
  -2   9   2  364.66   21.10
   1  -9  -2    0.00    3.50
  -1   9   2   14.70    6.60
   0  -9  -2   62.59    9.80
   0   9   2   64.39   12.60
  -1  -9  -2  441.26   22.40
   1   9   2  382.76   25.50
  -2  -9  -2   95.59   10.50
   2   9   2   70.59   13.10
  -3  -9  -2  115.39   12.30
   3   9   2  156.88   17.10
  -4  -9  -2  352.36   23.20
   4   9   2  312.67   24.30
  -5  -9  -2    6.30    5.60
   5   9   2   19.40    9.50
   5 -10  -2   19.50    9.00
  -5  10   2   24.90    8.20
  -5  10   2   34.20    9.40
  -4  10   2   -2.00    5.70
  -4  10   2    1.00    4.70
   3 -10  -2   21.20    7.80
  -3  10   2   18.40    7.20
  -3  10   2   28.00    8.50
   2 -10  -2  182.58   16.40
  -2  10   2  216.78   16.70
  -2  10   2  214.08   19.10
   1 -10  -2    2.70    4.70
  -1  10   2    5.80    6.00
   0 -10  -2   34.50    8.70
   0  10   2   33.00   10.10
  -1 -10  -2   61.59   10.20
   1  10   2   71.89   13.30
  -2 -10  -2   -4.70    4.50
  -3 -10  -2  136.69   12.80
   3  10   2  147.59   20.00
  -4 -10  -2  125.79   13.80
   4  10   2   85.69   14.30
  -3  11   2   -9.80    7.00
   2 -11  -2    2.60    6.20
  -2  11   2    0.00    5.90
   1 -11  -2   18.90    7.80
  -1  11   2   19.30    9.70
   0 -11  -2   18.40    8.10
   0  11   2   25.80    9.90
  -1 -11  -2   53.39   10.70
   1  11   2   42.30   11.40
  -2 -11  -2   -2.10    5.30
   3  11  -3   13.40    8.10
   2  11  -3   60.19   12.40
  -2 -11   3   59.89    8.10
   1  11  -3   91.39   16.00
   0  11  -3   -8.60    5.60
   0  11  -3    3.90    4.40
   0 -11   3   -0.90    4.70
  -1  11  -3   46.60   10.20
  -1  11  -3   21.60    7.00
   1 -11   3   24.60    8.60
  -2  11  -3   42.00   11.60
  -2  11  -3   65.19   10.20
   2 -11   3   47.70    9.80
  -3  11  -3   31.10    7.70
  -3  11  -3   65.89   13.30
   5  10  -3   -3.30    6.10
   4  10  -3   78.09   14.00
   3  10  -3   43.70   10.20
  -3 -10   3   38.90    5.20
   2  10  -3   -0.40    5.90
  -2 -10   3    3.50    5.00
   1  10  -3   46.60   10.40
  -1 -10   3   51.39   12.20
  -1 -10   3   43.60    7.00
   0  10  -3   10.90    4.50
   0  10  -3   22.00    7.00
   0 -10   3   15.10    5.50
  -1  10  -3   -0.80    4.70
  -1  10  -3    1.60    3.20
   1 -10   3   -4.10    3.70
  -2  10  -3    8.20    4.00
  -2  10  -3    7.10    6.30
  -3  10  -3   70.69   11.10
  -3  10  -3   61.19   11.10
  -4  10  -3   14.40    7.30
  -4  10  -3   35.50    8.90
   7   9  -3   -4.60    3.80
   6   9  -3   46.90   11.90
   5   9  -3    7.70    5.60
   4   9  -3  158.98   17.10
  -4  -9   3  151.08    5.80
  -4  -9   3  171.08    8.70
   3   9  -3    0.60    4.80
  -3  -9   3    0.40    2.30
   2   9  -3  122.49   16.60
  -2  -9   3  115.69    8.10
  -2  -9   3  128.99    8.10
   1   9  -3  410.66   25.40
  -1  -9   3  475.95   18.30
  -1  -9   3  484.45   18.60
   0   9  -3  100.09    9.10
   0   9  -3   84.39   13.10
   0  -9   3   81.79    8.40
   0  -9   3   93.19    9.20
  -1   9  -3  204.38   13.30
  -1   9  -3  186.58   16.30
  -2   9  -3   53.29    8.50
  -2   9  -3   65.59   11.50
  -3   9  -3  280.37   18.70
  -3   9  -3  336.17   19.20
  -4   9  -3   12.80    5.70
  -4   9  -3   15.30    6.10
  -5   9  -3   -6.90    4.60
  -5   9  -3    8.00    5.80
  -6   9  -3   17.50    6.90
  -6   9  -3    8.20    7.40
   8   8  -3   -1.10    6.90
   7   8  -3    0.80    4.70
   6   8  -3   28.70    9.50
   5   8  -3  187.68   17.50
   4   8  -3  106.59   15.40
  -4  -8   3  120.19    4.50
   3   8  -3   16.40    7.10
  -3  -8   3   12.80    2.70
  -3  -8   3   15.50    2.70
   2   8  -3  555.54   28.60
  -2  -8   3  566.94   17.70
  -2  -8   3  587.04   18.20
   1   8  -3   35.30    5.40
  -1  -8   3   35.60    5.40
  -1  -8   3   34.10    5.10
   0   8  -3   24.80    7.30
   0   8  -3   21.90    4.80
   0  -8   3   20.40    4.30
  -1   8  -3   17.30    4.90
  -1   8  -3   20.10    6.30
   1  -8   3   10.20    4.20
  -2   8  -3   67.79   10.50
  -2   8  -3   79.19    8.70
  -3   8  -3   12.70    5.80
  -3   8  -3    7.30    4.60
  -4   8  -3  109.19   11.50
  -4   8  -3  102.99   10.80
  -5   8  -3    5.90    5.00
  -5   8  -3    2.30    4.70
   5  -8   3   12.20    4.80
  -6   8  -3   34.20    8.50
  -6   8  -3   21.20    6.00
  -7   8  -3   17.20    7.30
   8   7  -3   49.70   11.60
  -8  -7   3   44.40    7.30
   7   7  -3   63.09   12.30
  -7  -7   3  104.39    7.70
  -7  -7   3   92.89    5.30
   6   7  -3   -9.20    3.40
  -6  -7   3   -0.50    1.10
   5   7  -3    1.00    3.60
   4   7  -3  113.89   12.40
   3   7  -3   36.40    8.20
  -3  -7   3   37.50    3.10
  -3  -7   3   37.80    3.20
   2   7  -3  171.68   14.10
  -2  -7   3  192.68    8.30
  -2  -7   3  168.88    8.70
   1   7  -3   34.80    7.70
   1   7  -3   37.00    4.80
  -1  -7   3   44.50    4.80
  -1  -7   3   46.10    5.00
   0   7  -3    0.10    3.90
   0   7  -3   12.00    3.70
   0  -7   3   10.60    3.80
  -1   7  -3    5.40    3.20
  -1   7  -3   -3.10    3.20
   1  -7   3    4.30    3.50
  -2   7  -3   -1.10    2.80
  -2   7  -3    4.90    4.20
   2  -7   3   12.00    4.70
   2  -7   3    2.80    3.40
  -3   7  -3   37.30    7.20
  -3   7  -3   37.20    7.60
   3  -7   3   43.70    7.40
  -4   7  -3   11.00    4.80
  -4   7  -3    1.00    3.70
   4  -7   3    9.30    4.40
  -5   7  -3   41.80    8.80
  -5   7  -3   40.80    6.10
  -5   7  -3   39.40    6.50
   5  -7   3   34.00    6.00
  -6   7  -3  112.29    8.90
  -6   7  -3  142.29   13.70
  -6   7  -3  114.19    8.80
  -7   7  -3   49.10   11.50
  -8   7  -3   -4.00    5.60
   9   6  -3    2.40    6.50
  -9  -6   3    4.30    5.10
   8   6  -3   41.00    5.60
   8   6  -3   42.30    9.00
  -8  -6   3   33.10    4.80
   7   6  -3   -1.10    2.20
   7   6  -3    5.00    4.90
  -7  -6   3    0.30    2.20
   6   6  -3  101.29    6.70
   6   6  -3  115.59   13.10
  -6  -6   3  109.39    5.50
  -6  -6   3  113.19    5.60
   5   6  -3   62.59   10.30
  -5  -6   3   78.39    3.30
   4   6  -3  168.28   13.90
   3   6  -3    5.60    3.90
  -3  -6   3   12.60    1.40
   2   6  -3    2.40    2.80
  -2  -6   3    1.10    1.40
  -2  -6   3   -0.80    1.20
   1   6  -3   59.69    9.00
   1   6  -3   44.20    4.20
  -1  -6   3   58.79    8.60
  -1  -6   3   40.50    4.10
  -1  -6   3   48.80    4.40
   0   6  -3    7.80    4.20
   0   6  -3    3.70    2.40
   0  -6   3    6.70    3.00
   0  -6   3    2.00    2.30
  -1   6  -3   14.40    4.60
   1  -6   3   15.20    3.90
   1  -6   3   16.10    4.70
  -2   6  -3  116.09    9.30
  -2   6  -3  116.49   10.30
   2  -6   3  123.09    9.90
   2  -6   3  118.59    9.50
  -3   6  -3 1082.69   35.60
  -3   6  -3 1160.48   34.90
   3  -6   3 1066.09   33.50
  -4   6  -3   22.50    6.50
   4  -6   3   30.20    5.50
  -5   6  -3    3.50    3.50
  -5   6  -3   -2.00    2.50
  -5   6  -3   -5.00    2.50
   5  -6   3   -3.90    2.40
  -6   6  -3   30.10    4.60
  -6   6  -3   49.70    9.40
  -7   6  -3   -5.40    3.80
  -8   6  -3   37.70    8.50
  10   5  -3   -6.90    5.90
 -10  -5   3   -3.10    5.60
   9   5  -3  601.24   29.20
   8   5  -3    1.30    5.10
   8   5  -3   -0.40    2.90
  -8  -5   3   10.20    4.40
   7   5  -3   33.90    8.40
   7   5  -3   22.80    4.40
  -7  -5   3   33.60    4.60
   6   5  -3  612.44   27.60
  -6  -5   3  616.94   17.60
   5   5  -3  173.18   14.10
   5   5  -3  186.18    6.70
  -5  -5   3  187.88    6.60
   4   5  -3  122.69   11.60
  -4  -5   3  136.99   12.90
   3   5  -3   75.89    8.60
  -3  -5   3   71.99    7.90
   2   5  -3  268.17   15.50
  -2  -5   3  253.87   14.60
  -2  -5   3  239.58    7.20
  -2  -5   3  251.47    7.20
   1   5  -3   15.60    4.60
   1   5  -3   20.20    2.80
  -1  -5   3   17.40    5.70
  -1  -5   3   21.00    3.00
   0   5  -3   12.60    4.30
   0   5  -3    9.50    2.80
   0  -5   3    6.00    2.70
   0  -5   3    6.30    3.30
  -1   5  -3    3.10    2.30
  -1   5  -3    7.00    3.50
   1  -5   3    4.60    3.00
   1  -5   3    2.00    2.50
  -2   5  -3   84.09    8.00
  -2   5  -3   88.49    7.80
   2  -5   3   93.89    8.00
   2  -5   3   83.99    7.60
  -3   5  -3  108.69    8.30
  -3   5  -3  107.29    9.10
   3  -5   3  109.19    8.30
   3  -5   3   93.99    8.70
  -4   5  -3  109.49   10.40
  -4   5  -3  102.79    7.90
  -4   5  -3  100.89    7.40
   4  -5   3   91.19    7.40
  -5   5  -3   72.69    6.20
  -5   5  -3   75.29    6.50
  -5   5  -3   77.69   11.00
  -6   5  -3  391.86   12.40
  -6   5  -3  404.66   23.00
  -6   5  -3  391.46   12.30
  -7   5  -3   40.40    8.90
  -9   5  -3   49.99   12.40
  10   4  -3  111.29   12.10
 -10  -4   3  118.09   11.10
   9   4  -3   33.60    7.80
   9   4  -3   39.10    8.20
  -9  -4   3   42.90    7.00
   8   4  -3   10.50    5.80
   8   4  -3   21.20    4.90
  -8  -4   3   24.60    5.10
   7   4  -3   -4.60    2.80
   7   4  -3    0.10    2.50
  -7  -4   3    0.70    2.40
   6   4  -3  151.58    8.10
   6   4  -3  145.89   12.00
  -6  -4   3  146.69    7.80
  -6  -4   3  147.79   12.10
   5   4  -3  296.37   10.00
   5   4  -3  301.17   17.00
  -5  -4   3  300.17    9.90
  -5  -4   3  298.67   16.30
   4   4  -3   10.50    1.30
   4   4  -3   12.70    4.60
  -4  -4   3    4.20    3.40
   3   4  -3  408.16   18.80
  -3  -4   3  394.56   17.90
   2   4  -3  166.18   11.50
  -2  -4   3  157.48   10.50
   1   4  -3   15.40    5.00
   1   4  -3   17.40    2.30
  -1  -4   3   22.80    4.90
  -1  -4   3   18.40    2.60
   0   4  -3  225.48   12.50
   0   4  -3  240.08    9.60
   0  -4   3  252.67   12.90
   0  -4   3  223.18   11.10
  -1   4  -3 1020.80   28.40
  -1   4  -3 1029.20   30.20
   1  -4   3 1044.90   28.70
   1  -4   3 1011.30   30.20
  -2   4  -3   62.39    6.30
  -2   4  -3   71.29    8.20
   2  -4   3   67.59    6.40
   2  -4   3   66.49    6.80
  -3   4  -3   62.09    5.40
  -3   4  -3   46.00    7.00
  -3   4  -3   50.29    5.50
   3  -4   3   42.00    5.60
   3  -4   3   46.70    6.90
  -4   4  -3  152.98    8.30
  -4   4  -3  168.38    9.00
  -4   4  -3  155.98   12.00
  -5   4  -3   24.00    3.80
  -5   4  -3   24.90    6.40
  -5   4  -3   30.10    3.80
  -6   4  -3  271.67    8.50
  -6   4  -3  277.87   18.60
  -6   4  -3  276.47    8.60
  -7   4  -3   20.50    7.40
  -8   4  -3   -4.30    2.80
  -9   4  -3   69.49   13.00
  10   3  -3   14.70    6.10
 -10  -3   3   16.50    5.90
   9   3  -3  371.36   19.30
  -9  -3   3  368.56   18.10
   8   3  -3    2.40    3.40
   8   3  -3    1.70    4.20
  -8  -3   3   -8.00    2.80
  -8  -3   3    0.80    3.50
   7   3  -3  572.64   23.70
   7   3  -3  559.34   20.50
  -7  -3   3  551.94   23.20
   6   3  -3  146.99   11.40
   6   3  -3  137.59    8.30
  -6  -3   3  136.39    8.00
   5   3  -3  221.48   10.40
   5   3  -3  241.48   13.70
  -5  -3   3  221.98    9.00
  -5  -3   3  219.68   13.00
   4   3  -3  137.79    5.60
   4   3  -3  112.19    8.90
  -4  -3   3  126.69    9.50
  -4  -3   3  140.79    5.30
   3   3  -3   77.59    8.00
  -3  -3   3   75.69    7.40
   2   3  -3   61.09    6.30
  -2  -3   3   52.59    5.80
   1   3  -3 1065.49   30.60
   1   3  -3 1026.50   23.20
  -1  -3   3 1044.20   23.40
  -1  -3   3 1076.59   30.50
   0   3  -3   22.00   18.10
   0  -3   3    0.40    9.80
  -1   3  -3  147.69    8.10
  -1   3  -3  126.69    8.20
   1  -3   3  122.59    7.60
   1  -3   3  130.09    8.20
  -2   3  -3   91.59    7.30
  -2   3  -3   87.79    6.60
  -2   3  -3   86.69    6.60
   2  -3   3   90.19    7.50
   2  -3   3  100.39    7.00
  -3   3  -3  142.39    7.70
  -3   3  -3  121.89    9.30
  -3   3  -3  146.09    8.00
   3  -3   3  147.19    8.20
   3  -3   3  135.19    9.70
  -4   3  -3  371.26   18.00
  -4   3  -3  397.46   13.50
   4  -3   3  344.37   17.50
  -5   3  -3  412.66   13.20
  -5   3  -3  414.06   20.80
  -5   3  -3  397.36   13.20
  -6   3  -3  439.56   11.80
  -6   3  -3  448.36   12.00
  -7   3  -3  111.09   12.00
  -8   3  -3   69.49   12.00
  -9   3  -3   24.20    7.80
  10   2  -3    2.30    4.40
 -10  -2   3   -1.70    4.40
   9   2  -3   -5.20    3.00
  -9  -2   3    0.50    3.20
  -9  -2   3   -5.10    4.70
   8   2  -3   99.39    9.30
   8   2  -3   84.69    9.10
  -8  -2   3  104.29    9.30
  -8  -2   3   88.39    8.80
   7   2  -3  602.14   22.60
   7   2  -3  613.84   23.00
  -7  -2   3  646.54   22.60
  -7  -2   3  610.94   22.90
   6   2  -3  267.97   16.10
   6   2  -3  274.07   12.70
  -6  -2   3  262.77   13.60
  -6  -2   3  279.77   12.50
   5   2  -3   46.80    4.70
   5   2  -3   53.29    7.20
  -5  -2   3   49.60    4.70
  -5  -2   3   50.19    6.60
   4   2  -3  116.49    6.00
   4   2  -3  126.19    8.70
  -4  -2   3  109.09    5.60
  -4  -2   3  118.89    8.50
   3   2  -3  112.69    8.30
   3   2  -3  107.09    4.50
  -3  -2   3  106.69    4.40
  -3  -2   3   94.79    7.30
   2   2  -3    9.60    3.10
   2   2  -3   11.70    1.30
   2   2  -3   12.70    1.20
  -2  -2   3    9.40    2.90
   1   2  -3 1380.76   35.80
   1   2  -3 1397.76   30.30
  -1  -2   3 1377.06   30.20
  -1  -2   3 1467.95   36.30
   0   2  -3 1876.11   41.80
   0   2  -3 1901.01   45.10
   0  -2   3 1826.62   41.70
   0  -2   3 1904.31   45.10
  -1   2  -3   69.19    5.60
  -1   2  -3   61.49    5.20
  -1   2  -3   68.69    5.60
   1  -2   3   70.19    5.70
   1  -2   3   81.09    5.90
  -2   2  -3    8.20    2.90
  -2   2  -3   11.20    3.10
  -2   2  -3   11.00    3.40
   2  -2   3   12.20    3.90
  -3   2  -3   69.69    7.50
  -3   2  -3   61.09    5.30
   3  -2   3   60.19    6.50
  -4   2  -3   25.70    5.90
  -4   2  -3   24.70    3.70
  -4   2  -3   25.70    3.80
   4  -2   3   22.30    5.30
  -5   2  -3  825.22   22.40
  -5   2  -3  830.92   30.90
  -5   2  -3  846.62   22.30
  -6   2  -3  800.52   20.90
  -6   2  -3  816.32   32.00
  -6   2  -3  809.32   20.70
  -7   2  -3   25.30    7.10
  -8   2  -3   25.50    7.50
 -11  -1   3   24.00    6.50
  10   1  -3  332.47   14.10
 -10  -1   3  346.27   19.90
   9   1  -3    8.70    3.40
   9   1  -3   12.50    4.00
  -9  -1   3    0.30    3.80
  -9  -1   3    1.70    5.00
   8   1  -3   26.00    5.00
   8   1  -3   22.70    4.50
  -8  -1   3   20.70    5.20
  -8  -1   3   24.30    4.80
   7   1  -3   14.90    4.50
   7   1  -3   16.40    4.10
  -7  -1   3   20.30    5.20
  -7  -1   3   12.20    3.90
   6   1  -3   45.70    6.00
   6   1  -3   44.70    6.40
  -6  -1   3   54.89    5.90
   5   1  -3   77.89    6.40
   5   1  -3   93.19    7.00
  -5  -1   3   93.89    6.70
  -5  -1   3   77.29    6.40
   4   1  -3 1241.38   31.30
   4   1  -3 1321.97   33.90
  -4  -1   3 1282.97   31.30
  -4  -1   3 1254.27   33.60
   3   1  -3  281.47   11.70
   3   1  -3  263.17    9.10
  -3  -1   3  264.77    9.20
  -3  -1   3  270.17   11.70
   2   1  -3  237.38    7.60
   2   1  -3  239.18    7.80
   2   1  -3  238.78   10.60
   2   1  -3  236.58   10.10
  -2  -1   3  237.28    7.70
  -2  -1   3  208.18   10.00
   1   1  -3   62.29    5.70
   1   1  -3   54.69    3.50
   1   1  -3   48.40    4.90
  -1  -1   3   55.89    6.00
  -1  -1   3   52.09    3.40
   0   1  -3 6520.45  209.38
   0  -1   3 6225.08  201.88
  -1   1  -3  280.97   11.30
  -1   1  -3  272.27   12.30
  -1   1  -3  268.57   10.90
   1  -1   3  262.37   10.50
   1  -1   3  252.67   10.70
  -2   1  -3   48.30    4.70
  -2   1  -3   46.60    5.10
   2  -1   3   54.19    5.80
   2  -1   3   57.69    5.00
  -3   1  -3  946.71   29.90
  -3   1  -3  832.42   26.90
  -3   1  -3  961.30   25.70
   3  -1   3  942.51   29.20
   3  -1   3  957.00   25.10
  -4   1  -3    4.90    3.40
  -4   1  -3    3.20    2.20
  -4   1  -3    3.90    2.30
   4  -1   3    5.00    2.30
   4  -1   3   15.00    5.00
  -5   1  -3  625.94   25.90
  -5   1  -3  641.94   19.60
  -5   1  -3  676.73   20.10
   5  -1   3  630.34   19.10
  -6   1  -3  547.05   17.80
  -6   1  -3  606.64   26.50
   6  -1   3  597.84   17.80
  -7   1  -3 1122.09   40.70
  -7   1  -3 1080.69   27.30
  -7   1  -3 1050.99   27.40
   7  -1   3 1062.59   26.70
  -8   1  -3    5.00    6.20
  -8   1  -3    8.10    2.10
  -9   1  -3  105.29   15.00
 -11   0   3    7.00    6.40
 -10   0   3  103.99   13.50
   9   0  -3  117.19    8.40
   9   0  -3  102.39    6.20
  -9   0   3   90.19   13.80
   8   0  -3   39.00    4.80
   8   0  -3   45.10    5.40
  -8   0   3   52.59    8.30
   7   0  -3  136.49   10.90
   7   0  -3  151.68    8.20
   7   0  -3  153.48    8.40
  -7   0   3  130.09   10.20
   6   0  -3   22.00    3.60
   6   0  -3   15.40    3.30
   6   0  -3   13.60    4.00
  -6   0   3   12.60    3.10
  -6   0   3   21.10    4.40
   5   0  -3  614.14   21.00
   5   0  -3  642.64   19.40
   5   0  -3  624.54   19.00
  -5   0   3  618.64   19.40
  -5   0   3  629.14   20.90
   4   0  -3  442.26   15.30
   4   0  -3  478.75   15.50
   4   0  -3  425.46   15.40
  -4   0   3  450.85   15.60
  -4   0   3  447.96   15.70
   3   0  -3  357.16   14.20
   3   0  -3  392.26   13.70
  -3   0   3  375.46   12.80
   2   0  -3  831.72   23.50
   2   0  -3  870.61   22.30
   2   0  -3  868.71   22.00
   2   0  -3  854.81   23.60
  -2   0   3  843.32   23.10
  -2   0   3  918.81   22.30
   1   0  -3 6725.03  178.28
  -1   0   3 6903.61  175.98
   0   0  -3  142.49    7.10
   0   0  -3  144.49    8.90
   0   0   3  155.28    7.90
   0   0   3  137.69    6.80
  -1   0  -3  259.67   11.20
  -1   0  -3  283.57   11.50
   1   0   3  294.37   11.50
   1   0   3  274.87   11.20
  -2   0  -3   41.60    5.20
  -2   0  -3   42.20    5.50
   2   0   3   39.90    5.50
   2   0   3   46.00    4.70
  -3   0  -3  156.78    9.10
  -3   0  -3  155.18   12.40
   3   0   3  178.58    9.10
   3   0   3  143.39    9.80
  -4   0  -3    2.70    2.20
  -4   0  -3    6.90    3.60
   4   0   3    4.00    2.40
   4   0   3    4.00    4.00
  -5   0  -3   99.39    7.30
  -5   0  -3   79.89    8.40
   5   0   3   98.79    7.20
  -6   0  -3  640.04   27.40
  -6   0  -3  629.14   21.20
   6   0   3  665.53   21.30
  -7   0  -3   48.50    6.00
  -7   0  -3   43.00    8.90
   7   0   3   60.49    6.00
  -8   0  -3  214.78   11.00
  -8   0  -3  216.08   17.20
   8   0   3  214.88   10.40
  -9   0  -3   73.99   12.90
  -9   0  -3   61.09    6.10
   9   0   3   81.19    5.50
 -11   1   3   39.20    9.80
 -10   1   3   40.50    9.00
  -9   1   3    5.10    4.90
   8  -1  -3   95.79    4.50
   8  -1  -3   98.39    5.80
  -8   1   3   86.79    9.90
   7  -1  -3   -2.50    1.50
   7  -1  -3   -2.10    1.60
  -7   1   3   -0.30    3.10
   6  -1  -3  497.65   15.40
   6  -1  -3  505.15   15.50
   6  -1  -3  508.35   20.70
  -6   1   3  502.05   20.30
   5  -1  -3  555.74   17.10
   5  -1  -3  571.64   20.90
   5  -1  -3  571.54   17.00
  -5   1   3  574.74   20.80
   4  -1  -3   60.59    5.90
   4  -1  -3   60.89    5.10
   4  -1  -3   64.89    5.20
  -4   1   3   57.89    6.00
   3  -1  -3   23.00    3.50
   3  -1  -3   19.10    3.40
   3  -1  -3   22.40    3.60
  -3   1   3   23.00    3.70
  -3   1   3   24.90    4.10
   2  -1  -3 2950.40   64.39
   2  -1  -3 2892.41   64.59
  -2   1   3 2934.31   64.59
  -2   1   3 2987.90   64.59
   1  -1  -3  875.21   24.30
   1  -1  -3  895.31   23.70
   1  -1  -3  854.51   23.30
  -1   1   3  877.51   24.20
  -1   1   3  859.71   23.50
   0  -1  -3  142.89    8.30
   0  -1  -3  166.38    8.10
   0   1   3  162.08    8.50
   0   1   3  149.69    7.90
  -1  -1  -3   49.80    5.20
  -1  -1  -3   46.00    4.70
   1   1   3   49.40    4.80
   1   1   3   39.70    5.30
  -2  -1  -3  968.20   27.60
  -2  -1  -3  936.61   27.90
   2   1   3  931.31   27.40
   2   1   3  934.91   27.70
  -3  -1  -3  803.42   26.70
  -3  -1  -3  813.82   25.40
   3   1   3  808.92   26.50
   3   1   3  813.22   25.30
  -4  -1  -3  318.97   14.60
  -4  -1  -3  335.07   16.50
   4   1   3  316.57   14.50
   4   1   3  318.27   16.30
  -5  -1  -3  100.89   10.10
  -5  -1  -3  107.79    8.60
   5   1   3  107.39    8.40
  -6  -1  -3   -0.60    2.40
  -6  -1  -3    4.00    3.40
   6   1   3   -0.80    3.50
  -7  -1  -3    2.80    3.50
  -7  -1  -3    1.40    2.80
   7   1   3   -0.10    2.70
  -8  -1  -3   33.80    8.40
  -8  -1  -3   17.30    5.00
   8   1   3   22.60    4.90
  -9  -1  -3   48.40   10.70
 -10   2   3   46.10    9.50
  -9   2   3  534.95   26.60
  -8   2   3  353.36   23.50
   7  -2  -3   14.40    2.10
   7  -2  -3   11.20    2.00
  -7   2   3   11.70    4.80
   6  -2  -3  102.19    5.60
   6  -2  -3   97.89    5.60
   6  -2  -3  101.79    9.10
  -6   2   3   94.39    9.30
   5  -2  -3  693.73   19.40
   5  -2  -3  653.83   24.20
   5  -2  -3  654.43   19.00
  -5   2   3  659.23   23.90
   4  -2  -3   12.80    3.80
  -4   2   3   12.40    3.00
  -4   2   3   16.00    4.00
   3  -2  -3   74.59    6.60
   3  -2  -3   74.39    5.90
  -3   2   3   86.29    7.30
  -3   2   3   84.89    6.20
   2  -2  -3  570.84   18.70
   2  -2  -3  585.04   19.30
   2  -2  -3  580.14   18.70
  -2   2   3  558.14   18.50
  -2   2   3  575.74   18.90
   1  -2  -3   23.80    4.30
   1  -2  -3   30.70    4.40
   1  -2  -3   27.70    4.10
  -1   2   3   30.00    4.90
  -1   2   3   26.20    4.20
   0  -2  -3 4752.92  100.19
   0   2   3 4453.65   99.59
  -1  -2  -3  562.64   20.10
  -1  -2  -3  599.84   19.70
   1   2   3  581.44   19.30
   1   2   3  527.95   19.70
  -2  -2  -3 1007.80   29.90
  -2  -2  -3  957.60   28.80
   2   2   3  906.01   29.00
   2   2   3  967.70   28.70
  -3  -2  -3  170.88   10.90
  -3  -2  -3  169.48   11.10
   3   2   3  163.68   10.50
   3   2   3  167.98   11.10
  -4  -2  -3  628.84   24.40
  -4  -2  -3  621.74   23.40
   4   2   3  666.83   24.20
   4   2   3  643.64   24.40
  -5  -2  -3    7.50    3.40
  -5  -2  -3    6.70    3.50
   5   2   3    5.70    3.70
  -6  -2  -3   91.59   11.80
   6   2   3   86.29    9.20
  -7  -2  -3  740.73   31.30
  -7  -2  -3  722.53   27.40
   7   2   3  748.93   28.00
  -8  -2  -3  101.99   11.40
  -8  -2  -3  119.69   13.30
   8   2   3  111.49   10.80
  -9  -2  -3   12.20    5.10
   9   2   3   -0.70    4.10
 -10   3   3   12.80    5.50
  -9   3   3  203.78   16.70
  -8   3   3   12.80    5.40
   7  -3  -3  298.07    7.50
  -7   3   3  277.37   17.30
   6  -3  -3  236.28    9.30
   6  -3  -3  243.78    9.50
  -6   3   3  232.88   14.80
   5  -3  -3  142.79   10.50
   5  -3  -3  154.38    9.40
  -5   3   3  156.68    7.90
  -5   3   3  150.48   11.20
   4  -3  -3  373.46   14.10
  -4   3   3  347.37   13.50
  -4   3   3  349.87   16.50
   3  -3  -3   60.79    6.10
   3  -3  -3   59.49    6.50
  -3   3   3   58.19    6.20
  -3   3   3   60.59    6.30
   2  -3  -3   95.49    7.70
   2  -3  -3   95.19    7.30
   2  -3  -3   96.29    7.70
  -2   3   3  100.49    8.00
  -2   3   3  103.39    8.00
   1  -3  -3 1102.19   31.90
   1  -3  -3 1062.69   30.30
   1  -3  -3 1104.09   31.30
  -1   3   3 1091.19   30.90
  -1   3   3 1089.99   31.80
   0  -3  -3  775.92   25.90
   0  -3  -3  828.82   24.90
   0  -3  -3  786.42   24.80
   0   3   3  822.62   25.20
   0   3   3  788.02   26.20
  -1  -3  -3 4135.89   90.59
  -1  -3  -3 3958.40   92.19
   1   3   3 4018.60   90.09
   1   3   3 4160.48   93.19
  -2  -3  -3   26.70    6.20
  -2  -3  -3   30.10    6.10
   2   3   3   22.40    5.30
   2   3   3   27.80    5.30
  -3  -3  -3  294.87   15.10
  -3  -3  -3  282.67   15.50
   3   3   3  287.77   14.60
   3   3   3  311.77   16.20
  -4  -3  -3   12.60    4.50
  -4  -3  -3    4.70    3.60
   4   3   3   17.10    5.00
   4   3   3   11.50    4.70
  -5  -3  -3    7.90    4.00
  -5  -3  -3    4.40    4.00
   5   3   3    2.50    3.80
  -6  -3  -3  335.07   19.20
  -6  -3  -3  295.37   17.60
   6   3   3  330.77   18.30
  -7  -3  -3   31.90    8.20
   7   3   3   15.40    5.90
  -8  -3  -3   76.99   12.40
   8   3   3  105.39   10.60
  -9  -3  -3   35.90    8.90
   9   3   3   42.70    8.10
 -10   4   3   91.69   13.90
  -9   4   3   29.00    7.30
  -8   4   3  112.79   12.50
   7  -4  -3   20.60    2.40
   7  -4  -3   21.10    2.30
  -7   4   3    3.90    4.90
   6  -4  -3  599.24   18.30
  -6   4   3  549.25   24.80
  -6   4   3  580.24   17.50
   5  -4  -3   37.40    5.30
  -5   4   3   34.50    6.90
  -5   4   3   35.80    5.00
   4  -4  -3  540.75   22.30
   4  -4  -3  558.54   19.80
  -4   4   3  558.94   22.70
  -4   4   3  581.34   20.10
   3  -4  -3    0.50    2.80
   3  -4  -3   -0.20    2.30
  -3   4   3    0.60    3.10
  -3   4   3    0.30    2.00
   2  -4  -3   -0.90    1.40
   2  -4  -3    0.70    2.50
   2  -4  -3    1.70    2.50
  -2   4   3    1.10    3.00
  -2   4   3    3.50    3.10
   1  -4  -3 1360.96   37.30
   1  -4  -3 1354.16   38.10
   1  -4  -3 1414.46   39.30
  -1   4   3 1289.67   37.30
  -1   4   3 1304.07   43.10
   0  -4  -3    1.70    2.00
   0  -4  -3    8.30    3.60
   0  -4  -3    0.50    3.20
   0   4   3    2.50    2.70
   0   4   3    0.30    3.30
  -1  -4  -3 1013.10   30.20
  -1  -4  -3  985.40   30.30
  -1  -4  -3 1003.90   33.30
   1   4   3  933.71   32.40
   1   4   3  955.10   30.00
  -2  -4  -3   60.69    8.60
  -2  -4  -3   59.19    6.50
   2   4   3   52.09    8.10
   2   4   3   59.29    7.70
  -3  -4  -3  333.37   16.60
  -3  -4  -3  302.17   17.10
   3   4   3  315.97   15.90
   3   4   3  307.77   17.60
  -4  -4  -3    5.00    3.90
   4   4   3    6.90    4.50
   4   4   3    5.40    2.90
  -5  -4  -3  385.76   19.80
   5   4   3  391.76   20.90
  -6  -4  -3   68.79   10.50
   6   4   3   71.99   11.30
  -7  -4  -3   96.99   11.10
   7   4   3  118.89   12.30
  -8  -4  -3  111.19   12.80
   8   4   3  120.49   13.20
  -9  -4  -3    5.80    6.10
 -10   5   3  103.89   15.70
  -9   5   3   13.70    7.10
  -8   5   3  141.29   14.30
   7  -5  -3   41.00    4.20
   7  -5  -3   42.00    4.10
  -7   5   3   36.10    8.20
  -7   5   3   46.10    4.20
   6  -5  -3  315.57   13.20
  -6   5   3  319.97   19.30
  -6   5   3  305.47   13.10
   5  -5  -3 1266.07   35.30
  -5   5   3 1268.17   41.60
  -5   5   3 1250.97   35.30
   4  -5  -3  488.05   19.50
  -4   5   3  498.25   20.20
  -4   5   3  480.75   22.00
   3  -5  -3   30.20    6.40
   3  -5  -3   23.90    5.70
   3  -5  -3   35.50    6.40
  -3   5   3   19.80    5.30
  -3   5   3   22.40    5.30
   2  -5  -3  164.08   11.70
   2  -5  -3  173.88   11.70
   2  -5  -3  162.78   10.90
  -2   5   3  157.48   11.10
  -2   5   3  157.58   11.60
   1  -5  -3    8.00    4.00
   1  -5  -3    5.00    3.30
   1  -5  -3    7.80    3.60
  -1   5   3    3.20    3.10
  -1   5   3    4.40    3.30
   0  -5  -3 1231.38   36.10
   0  -5  -3 1221.38   38.20
   0   5   3 1180.88   38.50
   0   5   3 1078.99   38.30
  -1  -5  -3  618.64   25.70
  -1  -5  -3  624.34   23.40
  -1  -5  -3  607.54   23.10
   1   5   3  602.04   26.00
   1   5   3  622.24   23.70
  -2  -5  -3  183.98   11.90
  -2  -5  -3  166.58   11.60
   2   5   3  178.08   14.10
   2   5   3  174.78   11.60
  -3  -5  -3 2271.77   58.59
   3   5   3 2228.28   62.99
   3   5   3 2058.19   56.99
  -4  -5  -3   20.30    5.80
   4   5   3   19.70    6.70
  -5  -5  -3    1.40    4.20
   5   5   3    1.40    5.00
  -6  -5  -3  123.19   14.10
   6   5   3  119.89   12.90
  -7  -5  -3    5.20    4.70
   7   5   3    7.50    6.20
  -8  -5  -3   81.09   12.90
   8   5   3   49.00   10.80
  -9   6   3  143.19   15.70
  -8   6   3    6.80    5.20
   7  -6  -3   21.90    4.00
  -7   6   3   24.10    4.30
  -7   6   3   34.40    8.80
   6  -6  -3   31.30    5.50
  -6   6   3   18.30    5.60
  -6   6   3   24.40    5.20
   5  -6  -3  342.77   16.10
  -5   6   3  316.97   16.00
  -5   6   3  299.37   18.80
  -4   6   3  191.78   14.00
  -4   6   3  194.38   13.30
   3  -6  -3  169.18   13.20
   3  -6  -3  163.48   12.20
  -3   6   3  178.48   13.10
  -3   6   3  181.08   13.10
   2  -6  -3    1.50    3.50
   2  -6  -3    3.90    3.20
  -2   6   3    8.70    4.80
  -2   6   3    6.10    4.10
   1  -6  -3   66.29    9.20
   1  -6  -3   82.09    8.30
   1  -6  -3   67.79    9.30
  -1   6   3   70.19   10.10
  -1   6   3   73.99    8.00
   0  -6  -3  182.78   12.00
   0  -6  -3  185.28   12.30
   0   6   3  172.28   13.90
  -1  -6  -3  119.59    9.90
  -1  -6  -3  128.59   10.30
   1   6   3  122.49   12.30
   1   6   3  113.19    9.90
  -2  -6  -3 2003.60   54.19
  -2  -6  -3 1994.70   54.79
   2   6   3 1951.20   54.29
   2   6   3 2033.20   60.49
  -3  -6  -3  412.56   20.10
   3   6   3  423.06   23.60
  -4  -6  -3   24.70    6.40
   4   6   3   27.30    7.10
  -5  -6  -3    2.80    4.00
   5   6   3    1.80    4.60
  -6  -6  -3   13.70    6.20
   6   6   3    3.10    5.20
   7   6   3   85.69   13.40
  -8  -6  -3    5.80    6.90
   8   6   3    2.00    6.60
  -8   7   3   51.69   11.10
   7  -7  -3  218.88   12.00
  -7   7   3  260.47   19.40
  -7   7   3  232.38   12.50
   6  -7  -3  311.37   18.00
  -6   7   3  334.17   21.60
  -6   7   3  355.06   17.30
   5  -7  -3    6.30    4.40
  -5   7   3    1.00    2.80
  -5   7   3   -0.20    4.10
   4  -7  -3  190.38   14.90
   4  -7  -3  158.18   12.50
  -4   7   3  175.38   14.80
  -4   7   3  175.58   14.00
   3  -7  -3    3.60    3.10
  -3   7   3    0.00    4.30
  -3   7   3    3.40    4.20
   2  -7  -3    1.20    2.80
  -2   7   3    8.80    4.10
  -2   7   3   11.20    5.10
   1  -7  -3   39.00    7.90
  -1   7   3   40.70    8.40
   0  -7  -3 1567.24   47.00
   0   7   3 1530.15   50.79
  -1  -7  -3    7.70    4.30
   1   7   3    8.30    5.00
  -2  -7  -3   60.79    9.10
   2   7   3   77.49   12.20
  -3  -7  -3  188.18   14.20
   3   7   3  201.68   17.30
  -4  -7  -3   32.30    7.60
   4   7   3   26.20    8.40
  -5  -7  -3   26.50    7.20
   5   7   3   20.90    8.10
  -6  -7  -3   15.60    6.20
   6   7   3   -0.20    6.10
  -7  -7  -3  138.49   14.00
   7   7   3  126.69   17.00
  -7   8   3  116.09   15.50
  -7   8   3   93.39   10.10
   6  -8  -3  155.18   14.00
  -6   8   3  157.58   15.50
  -6   8   3  122.99   11.80
   5  -8  -3   -3.70    4.30
  -5   8   3    3.10    5.00
  -5   8   3   -3.60    3.40
   4  -8  -3   30.50    8.00
  -4   8   3   37.70    8.20
  -4   8   3   36.80    8.40
   3  -8  -3   16.50    7.00
  -3   8   3   17.30    6.30
  -3   8   3   12.20    6.00
   2  -8  -3   10.30    4.30
  -2   8   3    6.90    5.50
  -2   8   3    8.20    5.00
   1  -8  -3   47.10    8.60
  -1   8   3   45.00    9.00
   0  -8  -3   -1.70    3.70
   0   8   3   -0.60    3.60
  -1  -8  -3  556.64   25.00
   1   8   3  478.85   27.80
  -2  -8  -3   -5.00    3.30
   2   8   3    5.10    5.40
  -3  -8  -3  308.67   18.80
   3   8   3  378.46   24.90
  -4  -8  -3   -8.30    3.10
   4   8   3    3.00    5.70
  -5  -8  -3   -7.20    3.90
   5   8   3   12.20    6.80
  -6  -8  -3   14.20    7.50
   6   8   3    2.00    7.60
   6  -9  -3   -1.70    5.30
  -6   9   3    0.10    6.20
  -6   9   3    7.60    5.20
   5  -9  -3    8.50    6.60
  -5   9   3   19.70    7.80
  -5   9   3   12.50    5.80
   4  -9  -3   -9.80    3.10
  -4   9   3   -4.30    4.50
  -4   9   3    6.80    5.60
   3  -9  -3   92.59   13.50
  -3   9   3   91.69   13.40
  -3   9   3   69.99   11.20
   2  -9  -3   10.70    4.90
  -2   9   3    5.10    5.90
  -2   9   3    0.60    4.60
   1  -9  -3  176.18   15.10
  -1   9   3  155.18   15.80
   0  -9  -3  290.37   18.80
   0   9   3  295.37   22.20
  -1  -9  -3   -3.50    4.20
   1   9   3    7.90    5.00
  -2  -9  -3   -3.50    4.40
   2   9   3    2.70    5.20
  -3  -9  -3    8.10    5.40
   3   9   3   -6.30    6.40
  -4  -9  -3   10.40    5.70
   4   9   3   11.10    6.20
  -5  -9  -3   89.99   13.10
   5   9   3   49.00   12.50
   5 -10  -3   71.39   14.00
  -5  10   3   93.09   14.30
  -5  10   3   70.19   11.50
   4 -10  -3   14.80    8.80
  -4  10   3    9.30    6.30
  -4  10   3    9.90    5.90
   3 -10  -3   49.20    9.90
  -3  10   3   39.60   10.10
  -3  10   3   74.69   11.80
   2 -10  -3    8.00    5.80
   1 -10  -3    7.40    5.40
  -1  10   3    1.30    6.60
   0 -10  -3  377.06   22.30
   0  10   3  321.07   24.40
  -1 -10  -3   -1.90    4.30
   2  10   3   22.30    9.60
  -3 -10  -3   -7.50    5.50
   3  10   3    7.40    5.00
   2 -11  -3  -10.40    4.30
  -2  11   3   -1.90    6.30
   1 -11  -3   -3.80    5.00
  -1  11   3  -15.90    5.20
   0 -11  -3   68.29   12.70
   0  11   3   43.60   12.10
   3  11  -4   65.39   13.50
   2  11  -4  103.09   15.70
   1  11  -4   -1.20    6.10
  -1 -11   4  -12.60    4.20
   0  11  -4    4.60    4.10
   0 -11   4   -3.20    5.00
  -1  11  -4  142.39   18.10
  -1  11  -4  136.59   14.10
   1 -11   4   78.99   13.00
  -2  11  -4   -7.40    5.60
  -2  11  -4    5.40    4.70
   5  10  -4   -0.10    4.60
   4  10  -4  114.49   16.50
   3  10  -4  115.29   19.40
   2  10  -4  154.28   16.80
  -2 -10   4  133.69    8.40
  -2 -10   4  161.08   11.50
   1  10  -4  187.08   18.50
  -1 -10   4  151.98   10.90
  -1 -10   4  179.88   11.20
   0  10  -4   42.60    6.90
   0  10  -4   46.80   10.90
   0 -10   4   42.90    7.60
   0 -10   4   39.70    8.30
  -1  10  -4  168.28   17.40
  -1  10  -4  201.78   13.60
  -2  10  -4  112.69   15.90
  -2  10  -4  124.69   12.00
  -3  10  -4    5.20    6.20
  -3  10  -4    4.60    4.50
  -4  10  -4   31.00    8.20
  -4  10  -4   17.90    8.20
   7   9  -4  111.39   17.30
   6   9  -4   44.60   11.40
   5   9  -4   22.10    9.00
   4   9  -4   32.90   10.10
   3   9  -4  292.87   22.50
   2   9  -4  275.67   20.90
  -2  -9   4  267.37   11.00
  -2  -9   4  263.27   11.00
   1   9  -4  242.78   19.10
  -1  -9   4  262.77   12.90
  -1  -9   4  245.98   12.30
   0   9  -4  189.18   16.30
   0   9  -4  193.48   11.90
   0  -9   4  182.78   12.00
  -1   9  -4   30.90    8.60
  -1   9  -4   30.80    5.90
  -2   9  -4  123.09   13.50
  -2   9  -4  109.89   10.20
  -3   9  -4    3.60    5.10
  -4   9  -4  225.28   17.30
  -4   9  -4  205.28   16.00
  -5   9  -4   30.50    8.50
  -5   9  -4   13.40    6.70
   8   8  -4   12.30    7.40
   7   8  -4   -0.50    5.90
   6   8  -4    4.40    6.40
   5   8  -4   -8.80    4.60
   4   8  -4   14.60    6.00
   3   8  -4  104.49   14.50
   2   8  -4  184.88   16.00
  -2  -8   4  158.18    8.60
  -2  -8   4  166.38    7.60
   1   8  -4    4.40    2.60
   1   8  -4    7.60    5.10
  -1  -8   4    6.00    3.00
  -1  -8   4    9.00    3.00
   0   8  -4  229.68   19.70
   0   8  -4  262.07   13.10
   0  -8   4  241.98   12.70
  -1   8  -4   23.40    5.50
  -1   8  -4   21.40    7.30
   1  -8   4   19.50    5.40
  -2   8  -4    2.10    3.30
  -2   8  -4   -4.20    3.10
  -3   8  -4   -4.00    3.50
  -3   8  -4   -0.30    4.40
  -4   8  -4    0.20    3.70
  -4   8  -4    4.70    4.40
  -5   8  -4   10.00    5.10
  -5   8  -4   17.80    6.60
  -5   8  -4    7.60    5.30
   5  -8   4    0.60    4.60
  -6   8  -4   34.00    7.40
  -6   8  -4   49.50    9.50
   8   7  -4   30.00    8.60
   7   7  -4   15.00    7.10
   6   7  -4  555.84   29.70
   5   7  -4  201.88   17.30
   4   7  -4  291.47   20.40
   3   7  -4   26.70    8.70
   2   7  -4   56.69    9.90
  -2  -7   4   78.19    4.50
  -2  -7   4   69.49    4.30
   1   7  -4  142.09   13.10
   1   7  -4  152.78    8.00
  -1  -7   4  148.99    8.20
   0   7  -4   65.99    6.40
   0   7  -4   72.79   10.60
   0  -7   4   59.39    6.40
  -1   7  -4   -3.20    2.00
  -1   7  -4    0.50    3.70
   1  -7   4   -2.50    2.40
  -2   7  -4    7.10    4.30
  -2   7  -4    5.70    4.10
   2  -7   4   11.20    4.20
  -3   7  -4  506.35   23.00
  -3   7  -4  501.95   22.90
   3  -7   4  502.25   22.60
  -4   7  -4   60.39    8.80
  -4   7  -4   68.59    8.80
  -4   7  -4   60.69    9.90
   4  -7   4   46.30    7.40
  -5   7  -4   71.29    9.20
  -5   7  -4   63.69   10.30
  -5   7  -4   71.89    8.90
   5  -7   4   65.59   10.00
  -6   7  -4   95.79   10.20
  -6   7  -4  139.39   14.60
  -6   7  -4  106.39    9.20
  -7   7  -4   76.49   12.70
   9   6  -4   47.80   10.70
   8   6  -4   -2.20    2.30
   8   6  -4    8.20    5.40
  -8  -6   4    2.70    2.30
   7   6  -4   96.59   13.70
   6   6  -4  222.48   17.50
   5   6  -4  318.87   20.60
   4   6  -4  212.18   15.80
   3   6  -4   55.39    9.30
   2   6  -4   59.19    9.30
  -2  -6   4   55.79    3.10
  -2  -6   4   61.39    3.30
   1   6  -4  211.68   14.90
   1   6  -4  223.48    9.20
   0   6  -4  206.38   10.20
   0   6  -4  198.68   14.20
   0  -6   4  197.28   13.70
   0  -6   4  211.68   10.50
  -1   6  -4  192.38   13.30
  -1   6  -4  184.68   11.00
   1  -6   4  185.28   10.90
   1  -6   4  169.98   12.50
  -2   6  -4  131.99   10.30
  -2   6  -4  125.39   10.60
   2  -6   4  126.69   10.60
   2  -6   4  108.19    9.40
  -3   6  -4   22.90    5.90
  -3   6  -4   17.50    5.00
  -4   6  -4  264.57   13.90
  -4   6  -4  281.87   14.80
  -4   6  -4  248.98   16.10
   4  -6   4  267.97   14.60
  -5   6  -4  396.26   22.10
  -5   6  -4  354.36   15.80
  -5   6  -4  371.26   18.30
  -6   6  -4   59.89    6.60
  -6   6  -4   53.89    9.90
  -6   6  -4   50.39    6.30
  -7   6  -4   29.70    7.80
  -8   6  -4   52.79   11.50
  10   5  -4   67.79   11.10
   9   5  -4   24.20    7.00
  -9  -5   4   16.90    5.30
   8   5  -4  184.38   16.10
   8   5  -4  187.08    9.50
  -8  -5   4  184.38    9.40
   7   5  -4  128.59   12.90
  -7  -5   4  128.59    6.50
   6   5  -4   70.69    3.20
   6   5  -4   86.89   12.20
   5   5  -4  302.97   18.60
   4   5  -4  336.27   18.70
   3   5  -4   74.99   10.00
  -3  -5   4   78.89    8.60
   2   5  -4    9.00    4.10
  -2  -5   4   13.30    1.00
  -2  -5   4   13.80    4.30
   1   5  -4   72.69    4.50
   1   5  -4   74.99    9.80
  -1  -5   4   67.99    4.60
  -1  -5   4   63.29    8.80
   0   5  -4  126.59    7.30
   0   5  -4  132.69   10.40
   0  -5   4  126.89    7.60
  -1   5  -4  565.04   22.80
  -1   5  -4  608.04   20.70
   1  -5   4  600.64   23.00
   1  -5   4  598.84   20.80
  -2   5  -4 1634.34   45.10
  -2   5  -4 1713.73   45.30
   2  -5   4 1649.04   45.40
   2  -5   4 1566.64   44.50
  -3   5  -4  422.36   20.80
  -3   5  -4  416.66   17.30
  -3   5  -4  435.06   20.00
   3  -5   4  416.36   19.80
   3  -5   4  427.76   18.10
  -4   5  -4  520.05   23.80
  -4   5  -4  505.95   19.40
  -4   5  -4  492.65   18.90
   4  -5   4  511.45   19.80
  -5   5  -4   24.00    4.50
  -5   5  -4   21.40    5.90
  -5   5  -4   20.10    4.50
  -6   5  -4  156.28   14.10
  -6   5  -4  147.19    8.50
  -6   5  -4  177.28    9.10
  -7   5  -4   67.09   11.90
  -8   5  -4   14.00    7.30
  10   4  -4   26.30    6.80
 -10  -4   4   12.70    5.40
   9   4  -4   -2.00    4.60
   9   4  -4    6.90    4.20
  -9  -4   4    9.40    3.90
   8   4  -4  201.18   11.30
   8   4  -4  227.08   16.40
   7   4  -4  292.37   12.20
   7   4  -4  283.87   17.80
  -7  -4   4  300.07   11.80
   6   4  -4   74.79    4.90
   6   4  -4   69.69   10.00
  -6  -4   4   62.89    4.40
   5   4  -4  249.58   15.60
   5   4  -4  233.78    6.70
  -5  -4   4  236.58   14.70
   4   4  -4    5.30    3.90
  -4  -4   4    3.10    3.40
   3   4  -4  814.52   29.20
  -3  -4   4  808.92   28.60
   2   4  -4    9.10    4.10
  -2  -4   4    2.90    2.50
   1   4  -4  103.99    5.20
   1   4  -4  114.49    9.30
  -1  -4   4  106.09    5.40
  -1  -4   4  103.29    9.10
   0   4  -4  186.18    8.80
   0   4  -4  181.48   11.40
   0  -4   4  193.68    9.20
   0  -4   4  183.98   11.70
  -1   4  -4  274.37   13.90
  -1   4  -4  260.07   12.20
   1  -4   4  273.67   13.80
   1  -4   4  264.17   12.40
  -2   4  -4  100.99    8.20
  -2   4  -4  110.79    8.70
  -2   4  -4  102.19    7.90
   2  -4   4  113.99    8.80
   2  -4   4   98.69    8.00
  -3   4  -4   -2.00    1.90
  -3   4  -4   -1.50    2.80
  -3   4  -4    0.90    2.50
   3  -4   4    4.40    2.60
   3  -4   4   -2.50    2.90
  -4   4  -4  919.11   27.30
  -4   4  -4  890.81   32.70
  -4   4  -4  972.90   28.00
  -5   4  -4   43.40    8.50
  -5   4  -4   50.99    5.60
  -5   4  -4   36.60    5.10
  -6   4  -4  236.88   10.10
  -6   4  -4  255.87   18.10
  -7   4  -4    4.40    4.80
  10   3  -4    5.40    4.20
 -10  -3   4   -1.90    3.80
   9   3  -4  311.37   18.20
   9   3  -4  318.47   17.30
  -9  -3   4  344.77   16.70
   8   3  -4   -0.60    3.50
   8   3  -4   -5.20    3.00
  -8  -3   4    0.10    2.50
   7   3  -4   28.70    6.60
   7   3  -4   23.40    4.70
  -7  -3   4   23.10    4.10
  -7  -3   4   19.00    5.80
   6   3  -4  473.15   21.20
   6   3  -4  460.55   15.70
  -6  -3   4  473.45   15.40
  -6  -3   4  457.95   20.80
   5   3  -4   60.99    8.60
   5   3  -4   57.59    4.20
  -5  -3   4   61.39    4.10
   4   3  -4  598.14   22.70
   4   3  -4  544.05   14.10
   4   3  -4  546.75   13.40
  -4  -3   4  567.74   14.00
  -4  -3   4  565.24   22.30
   3   3  -4  445.86   19.10
  -3  -3   4  478.35   19.60
   2   3  -4   89.39    9.60
   2   3  -4  106.39    3.60
   2   3  -4  106.99    3.50
  -2  -3   4  106.69    8.60
  -2  -3   4  104.49    3.60
   1   3  -4  543.55   20.40
   1   3  -4  542.65   14.80
  -1  -3   4  581.04   21.00
  -1  -3   4  534.85   14.90
   0   3  -4 1299.47   35.60
   0   3  -4 1233.98   31.30
   0  -3   4 1262.07   35.60
   0  -3   4 1248.68   31.40
  -1   3  -4  714.33   23.00
  -1   3  -4  730.53   22.70
  -1   3  -4  745.63   24.00
   1  -3   4  705.73   22.50
   1  -3   4  717.73   23.80
  -2   3  -4  698.73   22.70
  -2   3  -4  749.23   27.80
  -2   3  -4  723.03   23.40
   2  -3   4  689.83   24.00
   2  -3   4  742.23   23.90
  -3   3  -4  870.71   29.30
  -3   3  -4  850.21   25.50
  -3   3  -4  830.02   25.60
   3  -3   4  852.91   29.20
  -4   3  -4  366.66   18.70
  -4   3  -4  342.27   14.00
  -4   3  -4  347.47   14.10
  -5   3  -4  651.63   20.70
  -5   3  -4  702.23   21.50
  -5   3  -4  699.03   28.90
  -6   3  -4  440.06   23.50
  -6   3  -4  397.86   13.90
  -7   3  -4   -3.00    2.30
  -7   3  -4    0.30    1.50
  -7   3  -4   -2.00    4.30
  -8   3  -4   97.59   13.80
  -9   3  -4  211.28   19.40
  10   2  -4  170.08   12.60
 -10  -2   4  174.38   15.50
   9   2  -4   -0.80    3.80
   9   2  -4   -1.50    3.40
  -9  -2   4    8.50    3.90
  -9  -2   4   -7.40    3.80
   8   2  -4  111.39   10.00
   8   2  -4   97.59    8.80
  -8  -2   4   81.29    9.10
  -8  -2   4  115.99    9.50
   7   2  -4  338.07   16.70
   7   2  -4  340.67   15.40
  -7  -2   4  347.77   15.10
  -7  -2   4  326.47   16.70
   6   2  -4  608.64   20.20
   6   2  -4  630.94   23.40
  -6  -2   4  609.24   23.10
  -6  -2   4  604.84   19.70
   5   2  -4  635.54   18.80
   5   2  -4  643.34   23.40
  -5  -2   4  608.54   22.80
  -5  -2   4  620.84   18.30
   4   2  -4   10.90    3.40
   4   2  -4    8.00    2.00
  -4  -2   4    7.80    2.80
  -4  -2   4    7.00    1.80
   3   2  -4  414.16   11.40
   3   2  -4  439.66   17.70
   3   2  -4  422.56   11.60
  -3  -2   4  399.26   16.90
   2   2  -4 1198.18   26.50
   2   2  -4 1201.98   33.90
   2   2  -4 1171.68   26.70
  -2  -2   4 1199.88   33.90
  -2  -2   4 1180.48   26.70
   1   2  -4   35.80    5.50
   1   2  -4   40.20    3.50
   1   2  -4   37.40    5.20
  -1  -2   4   35.60    3.40
  -1  -2   4   37.50    5.60
   0   2  -4   23.30    4.10
   0   2  -4   20.50    3.50
   0   2  -4   19.20    4.10
   0  -2   4   15.00    3.10
   0  -2   4   23.00    4.60
  -1   2  -4 3887.81   85.09
  -1   2  -4 3926.51   85.89
  -1   2  -4 3745.63   84.49
   1  -2   4 3875.11   84.79
   1  -2   4 3897.01   86.09
  -2   2  -4    1.20    3.40
  -2   2  -4   -1.30    2.10
  -2   2  -4    6.20    2.70
   2  -2   4    1.40    2.20
  -3   2  -4   52.99    7.40
  -3   2  -4   71.09    6.20
  -3   2  -4   71.49    6.10
  -4   2  -4   23.00    5.50
  -4   2  -4   20.00    4.20
  -4   2  -4   22.90    4.30
   4  -2   4   25.20    5.70
  -5   2  -4   57.29    9.30
  -5   2  -4   49.30    5.60
  -5   2  -4   61.49    5.90
  -6   2  -4   -2.10    2.00
  -6   2  -4   -2.50    2.30
  -6   2  -4   -2.50    3.10
  -7   2  -4    3.00    3.70
  -7   2  -4    6.80    2.50
  -8   2  -4   51.89   10.70
  -9   2  -4   39.00    8.60
 -11  -1   4  320.87   20.20
  10   1  -4   15.90    5.40
 -10  -1   4    6.60    4.70
   9   1  -4   92.59    8.00
  -9  -1   4   91.79    9.00
  -9  -1   4   80.29    9.20
   8   1  -4   26.40    6.70
   8   1  -4   20.70    4.30
  -8  -1   4   26.20    6.00
  -8  -1   4   13.00    4.00
   7   1  -4   11.10    3.70
   7   1  -4    0.70    2.80
  -7  -1   4   -0.50    3.00
  -7  -1   4   -2.00    2.40
   6   1  -4  192.58   11.10
   6   1  -4  173.38   10.30
   6   1  -4  193.18   10.70
  -6  -1   4  184.98   10.50
  -6  -1   4  167.58   10.80
   5   1  -4   48.50    4.90
   5   1  -4   68.19    6.50
   5   1  -4   61.49    6.20
  -5  -1   4   52.39    5.90
  -5  -1   4   56.69    5.30
   4   1  -4 1195.68   30.60
   4   1  -4 1238.08   34.30
   4   1  -4 1299.47   34.10
  -4  -1   4 1236.58   30.70
  -4  -1   4 1205.48   34.30
   3   1  -4   34.50    5.30
   3   1  -4   39.80    3.90
   3   1  -4   41.70    5.70
   3   1  -4   41.40    3.80
  -3  -1   4   33.10    3.70
  -3  -1   4   38.20    5.80
   2   1  -4  551.74   15.40
   2   1  -4  553.54   18.80
   2   1  -4  525.55   15.40
   2   1  -4  565.84   19.40
  -2  -1   4  552.24   19.30
  -2  -1   4  560.84   15.60
   1   1  -4 1902.71   42.60
   1   1  -4 1895.11   45.90
   1   1  -4 1857.81   46.30
  -1  -1   4 1862.91   42.30
  -1  -1   4 1876.51   45.50
  -1  -1   4 1850.21   46.40
   0   1  -4 1121.99   29.10
   0   1  -4 1098.49   30.40
   0   1  -4 1093.49   30.90
   0  -1   4 1137.79   29.00
   0  -1   4 1135.29   30.50
  -1   1  -4    7.20    3.20
  -1   1  -4   18.40    4.20
  -1   1  -4   10.30    3.00
   1  -1   4   11.60    3.20
   1  -1   4    8.50    3.20
  -2   1  -4  119.39    8.10
  -2   1  -4  122.99    9.40
  -2   1  -4  108.49    8.00
   2  -1   4  128.89    8.30
   2  -1   4  140.19    9.70
  -3   1  -4  390.06   17.80
  -3   1  -4  378.36   15.30
  -3   1  -4  368.76   15.30
   3  -1   4  387.66   17.80
   3  -1   4  369.46   14.70
  -4   1  -4  502.05   18.80
  -4   1  -4  566.64   19.60
  -4   1  -4  576.34   23.70
   4  -1   4  530.65   23.00
   4  -1   4  546.35   18.80
  -5   1  -4  217.58   11.50
  -5   1  -4  228.28   15.00
  -5   1  -4  213.58   11.40
   5  -1   4  235.18   11.30
  -6   1  -4    0.50    3.70
  -6   1  -4    6.50    3.40
  -6   1  -4    7.90    3.40
   6  -1   4    4.70    2.80
  -7   1  -4    0.70    3.00
  -7   1  -4    0.50    4.60
  -7   1  -4    0.80    2.70
   7  -1   4    0.30    2.40
  -8   1  -4   57.79    5.90
  -8   1  -4   60.49    6.30
  -8   1  -4   89.39   13.90
  -9   1  -4   93.19   14.80
 -11   0   4   35.20    8.20
  10   0  -4   -1.90    2.10
 -10   0   4    1.00    4.00
   9   0  -4  213.78   10.30
   9   0  -4  202.98   10.50
  -9   0   4  225.08   15.90
   8   0  -4   -0.60    2.50
   8   0  -4    2.20    2.60
  -8   0   4   -0.40    2.80
   7   0  -4  146.69   11.00
   7   0  -4  165.88    9.90
   7   0  -4  162.78    9.50
  -7   0   4  163.48   11.40
   6   0  -4  181.48    9.90
   6   0  -4  179.08   10.00
   6   0  -4  166.98   10.70
  -6   0   4  184.88   11.10
   5   0  -4   11.40    3.20
   5   0  -4   19.90    4.10
   5   0  -4   21.10    4.00
  -5   0   4   17.40    4.00
   4   0  -4  216.68   10.30
   4   0  -4  250.17   11.70
   4   0  -4  225.68   11.10
  -4   0   4  220.48   10.50
   3   0  -4 1705.03   42.80
   3   0  -4 1687.83   42.20
   3   0  -4 1681.03   40.60
   3   0  -4 1684.93   40.20
  -3   0   4 1711.03   41.90
  -3   0   4 1707.33   40.50
   2   0  -4  186.88    8.50
   2   0  -4  202.48    9.00
   2   0  -4  204.48   10.40
   2   0  -4  191.08   10.00
  -2   0   4  193.78    8.80
  -2   0   4  187.18    9.80
   1   0  -4  733.33   23.00
   1   0  -4  692.23   22.10
   1   0  -4  754.82   21.00
  -1   0   4  733.03   22.50
  -1   0   4  714.63   20.70
   0   0  -4  442.56   15.40
   0   0  -4  439.46   16.20
   0   0   4  423.06   15.90
   0   0   4  430.46   15.20
  -1   0  -4  399.86   16.00
  -1   0  -4  431.46   16.30
   1   0   4  427.86   16.30
   1   0   4  450.45   16.70
  -2   0  -4    0.10    2.70
  -2   0  -4   -2.70    1.90
   2   0   4    3.90    3.40
   2   0   4   -0.90    2.50
  -3   0  -4  286.87   15.00
  -3   0  -4  300.77   13.90
   3   0   4  315.77   13.90
   3   0   4  287.97   17.30
  -4   0  -4   18.80    5.40
  -4   0  -4   16.40    4.30
   4   0   4   28.50    5.00
   4   0   4   14.20    4.80
  -5   0  -4   -0.90    2.70
  -5   0  -4    5.00    4.30
   5   0   4   -0.30    2.60
  -6   0  -4    5.70    3.80
   6   0   4   -0.90    2.40
  -7   0  -4    6.90    3.70
  -7   0  -4   -2.70    3.50
   7   0   4    1.20    3.30
  -8   0  -4   57.19   10.90
  -8   0  -4   42.50    6.50
  -8   0  -4   40.00    7.00
   8   0   4   59.09    6.70
  -9   0  -4   34.00    9.40
 -11   1   4   20.90    7.50
 -10   1   4   14.40    6.30
   9  -1  -4  807.32   20.50
   9  -1  -4  803.32   20.40
  -9   1   4  821.92   32.60
   8  -1  -4   26.10    4.00
   8  -1  -4   28.50    4.20
  -8   1   4   30.10    7.10
   7  -1  -4  319.17   12.80
   7  -1  -4  297.17   12.40
  -7   1   4  327.37   16.80
   6  -1  -4    3.50    2.20
   6  -1  -4    5.10    2.50
   6  -1  -4    4.20    2.40
  -6   1   4    5.00    3.20
   5  -1  -4   54.19    5.30
   5  -1  -4   50.29    5.30
   5  -1  -4   55.09    6.10
  -5   1   4   56.09    7.20
   4  -1  -4  125.59    8.00
   4  -1  -4  132.09    8.30
   4  -1  -4  135.79    8.50
  -4   1   4  124.49    8.50
  -4   1   4  121.19    7.90
   3  -1  -4  146.19    9.00
   3  -1  -4  135.19    8.40
   3  -1  -4  144.49    8.60
   3  -1  -4  144.49    8.50
  -3   1   4  136.39    8.60
  -3   1   4  141.79    8.60
   2  -1  -4 1164.48   31.10
   2  -1  -4 1126.09   31.50
   2  -1  -4 1171.28   30.60
  -2   1   4 1153.08   31.50
  -2   1   4 1138.69   30.70
   1  -1  -4   22.20    3.90
   1  -1  -4   19.10    3.80
   1  -1  -4   24.00    4.70
  -1   1   4   19.60    3.90
  -1   1   4   21.10    3.70
   0  -1  -4 1980.50   48.70
   0  -1  -4 1991.30   47.60
   0   1   4 1868.21   48.00
   0   1   4 1963.50   47.20
  -1  -1  -4  536.55   19.70
  -1  -1  -4  523.35   19.00
   1   1   4  484.45   18.70
   1   1   4  544.55   19.00
  -2  -1  -4   73.19    7.80
  -2  -1  -4   70.29    7.20
   2   1   4   67.99    7.20
   2   1   4   77.39    7.70
  -3  -1  -4  121.99    9.30
  -3  -1  -4  120.29   10.00
   3   1   4  114.99    9.40
   3   1   4  108.39    8.80
  -4  -1  -4  133.09   10.90
  -4  -1  -4  112.39    9.10
   4   1   4  117.39   10.50
   4   1   4  133.19   10.00
  -5  -1  -4   21.50    5.50
  -5  -1  -4   18.60    5.70
   5   1   4   10.00    4.20
  -6  -1  -4  359.46   17.40
   6   1   4  365.66   17.50
  -7  -1  -4  275.87   18.80
   7   1   4  265.17   14.80
  -8  -1  -4   27.80    7.00
  -8  -1  -4   28.70    8.20
   8   1   4   21.50    5.20
  -9  -1  -4   40.40   10.00
   9   1   4   53.09    7.50
 -10   2   4   97.79   13.50
  -9   2   4  131.89   12.90
   8  -2  -4  147.19    6.70
   8  -2  -4  151.68    7.00
   7  -2  -4   47.30    4.80
   7  -2  -4   48.60    5.60
  -7   2   4   47.00    7.80
   6  -2  -4   76.39    6.20
   6  -2  -4   75.49   10.40
   6  -2  -4   76.99    6.30
  -6   2   4   74.89    7.80
   5  -2  -4  311.37   13.30
   5  -2  -4  312.07   13.20
   5  -2  -4  308.87   15.40
  -5   2   4  302.67   12.60
  -5   2   4  303.67   15.30
   4  -2  -4  267.47   13.30
   4  -2  -4  275.87   12.60
  -4   2   4  266.27   13.40
  -4   2   4  289.07   12.60
   3  -2  -4  244.98   12.50
   3  -2  -4  247.18   12.30
   3  -2  -4  248.88   12.20
  -3   2   4  266.07   13.20
  -3   2   4  262.97   12.40
   2  -2  -4 1742.53   43.80
   2  -2  -4 1726.73   44.70
   2  -2  -4 1758.32   44.90
  -2   2   4 1738.03   44.30
  -2   2   4 1777.62   44.80
   1  -2  -4  202.88   11.10
   1  -2  -4  207.38   10.60
   1  -2  -4  204.38   11.70
  -1   2   4  209.48   11.50
  -1   2   4  203.78   11.10
   0  -2  -4  155.78    9.80
   0  -2  -4  147.29   10.20
   0   2   4  135.49    9.20
   0   2   4  148.89   10.40
  -1  -2  -4 1597.94   43.60
  -1  -2  -4 1563.84   46.20
   1   2   4 1634.24   44.00
   1   2   4 1602.64   42.30
  -2  -2  -4    4.50    3.50
  -2  -2  -4   -0.10    3.30
   2   2   4    9.80    4.10
   2   2   4    7.50    3.60
  -3  -2  -4   29.80    5.80
  -3  -2  -4   22.90    5.20
   3   2   4   28.50    6.10
   3   2   4   38.80    6.70
  -4  -2  -4   -0.90    2.80
   4   2   4   -2.80    2.70
  -5  -2  -4   32.60    7.10
  -5  -2  -4   30.60    6.60
   5   2   4   32.80    6.70
  -6  -2  -4   -8.80    3.50
  -6  -2  -4    5.00    5.50
   6   2   4    1.50    3.70
  -7  -2  -4   67.09   11.80
   7   2   4   73.59    9.80
  -8  -2  -4  134.69   16.90
   8   2   4  144.39   12.20
  -9  -2  -4   23.00    8.40
   9   2   4    6.80    4.90
 -10   3   4  545.55   28.70
  -9   3   4  192.48   15.70
   8  -3  -4  272.67    8.40
  -8   3   4  278.27   18.20
   7  -3  -4  303.67   11.90
  -7   3   4  329.77   18.50
   6  -3  -4  177.58    9.80
   6  -3  -4  192.58   10.00
  -6   3   4  170.78   12.60
  -6   3   4  190.18    9.50
   5  -3  -4   48.00    7.40
   5  -3  -4   52.39    5.70
  -5   3   4   48.30    5.50
  -5   3   4   48.40    7.50
   4  -3  -4  154.38    9.70
   4  -3  -4  151.38   10.30
  -4   3   4  171.28   11.50
  -4   3   4  162.08    9.80
   3  -3  -4  998.80   30.50
   3  -3  -4  993.30   31.30
   3  -3  -4  968.40   29.70
  -3   3   4  974.60   29.70
  -3   3   4  986.10   30.80
   2  -3  -4 2687.93   65.39
   2  -3  -4 2668.33   64.59
   2  -3  -4 2789.12   66.19
  -2   3   4 2711.33   65.69
  -2   3   4 2731.93   65.49
   1  -3  -4 5437.66  120.89
   1  -3  -4 5650.73  122.09
   1  -3  -4 5804.42  123.59
  -1   3   4 5591.34  121.59
   0  -3  -4  561.44   20.60
   0  -3  -4  534.75   21.80
   0  -3  -4  554.74   20.80
   0   3   4  577.04   22.60
   0   3   4  559.74   20.80
  -1  -3  -4  600.94   22.40
  -1  -3  -4  596.44   23.60
   1   3   4  581.34   21.80
   1   3   4  600.44   23.60
  -2  -3  -4  285.47   18.10
  -2  -3  -4  267.27   14.80
   2   3   4  294.77   16.20
   2   3   4  280.97   17.10
  -3  -3  -4   59.99    8.50
  -3  -3  -4   60.89    8.80
   3   3   4   56.49    8.90
   3   3   4   66.09    8.60
  -4  -3  -4    3.40    3.70
  -4  -3  -4    4.30    4.10
   4   3   4    6.10    4.30
  -5  -3  -4 1244.08   41.60
   5   3   4 1200.28   40.50
  -6  -3  -4   34.50    7.70
   6   3   4   40.50    7.40
  -7  -3  -4   66.59   11.90
   7   3   4   67.99   10.60
  -8  -3  -4  121.59   13.90
   8   3   4  101.79   12.90
 -10   4   4   16.80    7.10
  -9   4   4   25.20    7.50
   8  -4  -4  280.67    8.20
  -8   4   4  271.57   18.70
   7  -4  -4  118.79    7.50
   7  -4  -4  105.89    7.20
  -7   4   4  122.29   11.90
   6  -4  -4  103.29    7.90
  -6   4   4  106.79   10.60
  -6   4   4  111.19    8.10
   5  -4  -4   97.09    8.10
  -5   4   4   93.09    7.80
  -5   4   4   90.99    9.10
   4  -4  -4   81.99    7.90
  -4   4   4  101.79    8.60
  -4   4   4   81.09    8.30
   3  -4  -4   25.70    5.50
   3  -4  -4   21.80    4.60
   3  -4  -4   28.80    5.50
  -3   4   4   28.10    5.50
  -3   4   4   22.70    4.90
   2  -4  -4  684.33   25.60
   2  -4  -4  768.92   26.10
   2  -4  -4  722.23   26.30
  -2   4   4  728.53   26.40
  -2   4   4  708.43   25.80
   1  -4  -4  127.09   10.40
   1  -4  -4  133.39   10.20
   1  -4  -4  112.99   10.40
  -1   4   4  142.39   11.20
   0  -4  -4  466.35   20.80
   0  -4  -4  457.75   19.40
   0  -4  -4  386.96   20.50
   0   4   4  472.15   21.30
  -1  -4  -4  703.33   25.50
  -1  -4  -4  718.43   25.50
  -1  -4  -4  727.43   27.70
   1   4   4  675.13   27.50
   1   4   4  675.93   25.20
  -2  -4  -4  490.05   22.50
  -2  -4  -4  496.75   21.20
   2   4   4  443.96   21.80
   2   4   4  469.45   20.50
  -3  -4  -4  130.69   10.80
   3   4   4  157.88   13.10
  -4  -4  -4  109.19   10.90
   4   4   4  146.89   12.70
  -5  -4  -4  260.17   16.80
   5   4   4  251.67   17.60
  -6  -4  -4  362.16   21.40
   6   4   4  396.56   22.40
  -7  -4  -4   54.19   10.20
   7   4   4   43.00    8.50
  -8  -4  -4   17.30    7.30
   8   4   4   14.10    6.00
 -10   5   4   -8.70    4.10
  -9   5   4  173.58   19.20
   8  -5  -4   30.20    3.50
   8  -5  -4   33.30    3.30
  -8   5   4   44.90    9.70
   7  -5  -4   14.80    4.10
   7  -5  -4   12.90    3.80
  -7   5   4   16.60    3.70
  -7   5   4   16.20    5.90
   6  -5  -4   38.50    6.10
  -6   5   4   31.90    5.80
  -6   5   4   22.30    6.00
   5  -5  -4  508.65   20.60
  -5   5   4  499.45   23.70
  -5   5   4  508.35   20.50
   4  -5  -4 1174.78   39.20
   4  -5  -4 1154.28   36.00
  -4   5   4 1230.48   36.90
  -4   5   4 1072.09   37.80
   3  -5  -4  582.04   24.70
   3  -5  -4  542.25   23.20
  -3   5   4  601.44   24.20
  -3   5   4  577.14   24.30
   2  -5  -4  194.28   12.70
   2  -5  -4  191.58   13.20
   2  -5  -4  190.28   13.40
  -2   5   4  195.98   12.90
  -2   5   4  188.38   13.20
   1  -5  -4    4.50    2.60
   1  -5  -4    4.30    4.20
   1  -5  -4    2.70    3.20
  -1   5   4   12.60    5.50
   0  -5  -4  340.47   19.10
   0  -5  -4  360.96   18.00
   0  -5  -4  355.66   17.30
   0   5   4  384.36   20.00
   0   5   4  388.16   18.10
  -1  -5  -4  310.87   16.80
  -1  -5  -4  323.07   16.50
   1   5   4  293.57   17.90
   1   5   4  319.47   16.90
  -2  -5  -4  138.69   11.50
   2   5   4  147.19   13.30
  -3  -5  -4   -5.10    2.60
   3   5   4    1.10    3.60
  -4  -5  -4   73.89   10.30
   4   5   4   65.49   10.60
   5   5   4   28.00    7.70
  -6  -5  -4    4.60    6.00
   6   5   4    1.10    5.60
  -7  -5  -4  101.99   14.50
   7   5   4  115.39   15.30
  -8  -5  -4   26.30    9.10
   8   5   4   32.90    9.10
  -9   6   4   -3.00    3.90
   8  -6  -4   68.39    5.70
  -8   6   4   89.39   13.80
   7  -6  -4   61.99    7.00
  -7   6   4   63.99   11.60
  -7   6   4   52.89    6.90
   6  -6  -4   17.80    5.00
  -6   6   4   16.40    6.30
  -6   6   4    8.70    4.20
   5  -6  -4  280.37   15.90
  -5   6   4  297.87   18.70
  -5   6   4  289.27   16.20
   4  -6  -4   59.29    8.80
   4  -6  -4   51.99    9.00
  -4   6   4   54.19    8.50
  -4   6   4   73.19   10.90
   3  -6  -4    7.80    4.80
   3  -6  -4    7.50    4.90
  -3   6   4    6.50    4.50
  -3   6   4   12.60    4.50
   2  -6  -4  369.76   19.70
  -2   6   4  341.07   19.50
  -2   6   4  358.16   19.00
   1  -6  -4  119.89   11.00
  -1   6   4  117.79   11.50
   0  -6  -4   25.10    6.00
   0   6   4   13.10    5.80
  -1  -6  -4  199.08   14.00
   1   6   4  203.08   16.10
  -2  -6  -4   99.29   10.00
   2   6   4  116.79   12.90
  -3  -6  -4   19.10    6.00
   3   6   4    7.40    5.00
  -4  -6  -4  166.28   13.90
   4   6   4  147.09   15.00
  -5  -6  -4    7.50    4.70
   5   6   4   28.10    8.00
  -6  -6  -4   68.39   11.50
   6   6   4   62.39   11.60
  -7  -6  -4   32.60    8.60
   7   6   4   20.40    7.40
   8  -7  -4   15.60    6.00
  -8   7   4   11.30    7.70
  -8   7   4    0.20    4.40
   7  -7  -4   21.30    6.40
  -7   7   4   34.50    8.40
  -7   7   4   35.00    6.50
   6  -7  -4   71.69    9.40
  -6   7   4   71.19    9.50
  -6   7   4   94.09   13.50
   5  -7  -4  178.38   15.70
  -5   7   4  205.18   16.30
  -5   7   4  189.78   14.30
   4  -7  -4  498.15   25.80
  -4   7   4  552.34   26.70
  -4   7   4  519.35   24.50
   3  -7  -4  257.97   17.50
  -3   7   4  251.77   17.10
  -3   7   4  264.87   17.70
   2  -7  -4  132.19   12.20
  -2   7   4  120.39   12.90
  -2   7   4  128.89   12.40
   1  -7  -4   67.29   10.00
  -1   7   4   70.59   11.20
   0  -7  -4  373.26   20.30
  -1  -7  -4  290.17   17.80
   1   7   4  303.07   20.30
  -2  -7  -4   -1.00    3.30
   2   7   4    1.50    3.70
   3   7   4   -0.50    4.80
  -4  -7  -4   22.00    7.10
   4   7   4   29.00    8.50
  -5  -7  -4  147.89   13.80
   5   7   4  161.98   16.90
  -6  -7  -4   90.59   13.20
   6   7   4  105.89   15.40
  -7   8   4   12.60    6.50
  -7   8   4   25.10    7.10
   6  -8  -4   31.20    9.20
  -6   8   4   44.30    8.70
  -6   8   4   49.70    9.80
   5  -8  -4    5.20    4.90
  -5   8   4    1.70    4.40
  -5   8   4    3.60    6.00
   4  -8  -4   37.20    9.00
  -4   8   4   54.49   10.70
  -4   8   4   47.90    9.50
   3  -8  -4  143.39   13.70
  -3   8   4  108.79   12.20
  -3   8   4  100.49   15.80
   2  -8  -4  202.28   16.00
  -2   8   4  199.18   17.10
   1  -8  -4  250.27   17.60
  -1   8   4  249.48   19.30
   0  -8  -4  289.77   18.70
   0   8   4  288.87   21.30
  -1  -8  -4   22.10    6.40
   1   8   4   17.30    6.90
  -2  -8  -4  171.08   14.40
   2   8   4  153.08   16.30
  -3  -8  -4    6.60    5.30
   3   8   4   10.80    5.20
  -4  -8  -4  109.99   14.60
   4   8   4   90.09   15.10
  -5  -8  -4   29.30    8.70
   5   8   4   11.50    7.80
   6  -9  -4  144.59   16.70
  -6   9   4  169.08   17.40
  -5   9   4    7.00    6.30
  -5   9   4   17.80    8.30
   4  -9  -4   22.10    7.80
  -4   9   4   11.50    6.70
  -4   9   4   12.50    6.40
   3  -9  -4   20.10    7.00
  -3   9   4   22.20    7.80
  -3   9   4   31.20    8.90
   2  -9  -4   54.99   10.90
  -2   9   4   68.09   13.00
   1  -9  -4   91.49   12.90
  -1   9   4   68.99   13.00
   0  -9  -4  114.79   13.00
   0   9   4  108.79   15.90
  -1  -9  -4   -7.60    3.20
   1   9   4    2.40    5.40
  -2  -9  -4   23.00    7.20
   2   9   4   31.70    9.40
  -3  -9  -4   10.10    6.00
   3   9   4   -4.30    6.30
  -4  -9  -4   -3.50    5.20
   4   9   4   -7.60    3.40
   5 -10  -4   38.00   10.80
  -5  10   4   27.90    9.30
  -5  10   4   33.40    9.00
   4 -10  -4   25.30    9.30
  -4  10   4   14.50    7.50
  -4  10   4    5.80    4.80
   3 -10  -4    2.50    4.10
  -3  10   4   11.40    6.90
   2 -10  -4   -2.10    4.70
  -2  10   4   12.00    7.50
   1 -10  -4   27.10    8.90
  -1  10   4   24.50    9.30
   0 -10  -4   22.10    7.50
   0  10   4   -0.40    4.70
  -1 -10  -4  207.28   17.40
   1  10   4  189.88   19.80
  -2 -10  -4   33.60    8.80
   2  10   4   -2.00    8.10
   2  11  -5   18.10    7.30
   1  11  -5   14.80    8.30
   0  11  -5    7.10    4.10
   0  11  -5    1.20    6.30
   0 -11   5    1.20    5.70
  -1  11  -5    0.80    4.10
   1 -11   5   -9.10    4.50
   5  10  -5   -6.00    5.00
   4  10  -5  195.48   20.40
   3  10  -5   72.49   14.50
   2  10  -5   -3.40    6.30
  -2 -10   5   -1.40    2.50
   1  10  -5   -9.10    5.40
   0  10  -5  -13.50    5.60
   0  10  -5    6.00    3.60
   0 -10   5    4.30    4.10
   0 -10   5  -17.40    6.90
  -1  10  -5  203.08   13.60
  -1  10  -5  205.28   18.90
  -2  10  -5   59.09    9.20
  -2  10  -5   50.69   11.50
  -3  10  -5   59.69   10.10
  -3  10  -5   53.59   11.10
  -4  10  -5   59.09   10.90
  -4  10  -5   66.89   12.20
   6   9  -5    2.80    5.00
   5   9  -5    5.00    5.50
   4   9  -5   19.00    8.10
   3   9  -5    1.70    5.10
   2   9  -5   10.80    7.60
  -2  -9   5   26.90    3.60
  -2  -9   5   24.60    3.30
   1   9  -5   38.50    9.70
   1   9  -5   25.00    4.60
  -1  -9   5   38.20    5.80
  -1  -9   5   44.60    5.90
   0   9  -5   34.00    9.20
   0   9  -5   28.80    5.50
  -1   9  -5    4.10    3.90
  -1   9  -5   -0.60    4.30
  -2   9  -5   -5.00    3.40
  -2   9  -5    1.60    4.70
  -3   9  -5   65.59   10.20
  -3   9  -5   78.19   12.00
  -4   9  -5   70.39   11.30
  -5   9  -5   -7.60    5.40
  -5   9  -5    0.90    4.50
   7   8  -5   -2.70    6.60
   6   8  -5   78.49   13.50
   5   8  -5   -1.20    3.50
   4   8  -5  132.39   17.40
   3   8  -5   68.39   12.50
   2   8  -5   19.20    7.40
  -2  -8   5   17.10    2.60
  -2  -8   5   17.80    2.50
   1   8  -5  169.78   16.00
   1   8  -5  175.78    9.20
  -1  -8   5  168.58    9.50
   0   8  -5   33.80    8.40
   0   8  -5   30.40    5.40
   0  -8   5   27.40    5.30
  -1   8  -5  864.11   29.40
   1  -8   5  887.21   30.00
  -2   8  -5   32.00    7.80
  -2   8  -5   41.10    7.50
  -3   8  -5   10.90    5.80
  -4   8  -5    5.20    4.10
  -4   8  -5  -11.00    3.50
  -5   8  -5   22.80    6.60
  -5   8  -5   18.70    6.90
  -6   8  -5   21.50    9.30
  -6   8  -5   22.10    7.60
   8   7  -5   27.60    9.80
   7   7  -5   31.00    9.80
   6   7  -5   -6.10    4.90
   5   7  -5   41.80    9.80
   4   7  -5   15.40    6.40
   3   7  -5  127.39   13.50
   2   7  -5   17.40    6.00
  -2  -7   5   25.00    2.30
  -2  -7   5   26.90    2.50
   1   7  -5  174.18   15.10
   1   7  -5  170.28    8.60
  -1  -7   5  182.08    9.20
   0   7  -5   22.40    7.10
   0   7  -5   18.40    4.30
   0  -7   5   17.10    4.20
  -1   7  -5  521.55   24.90
  -1   7  -5  523.15   20.70
   1  -7   5  509.85   21.10
  -2   7  -5   12.30    5.00
  -2   7  -5   14.30    4.60
  -3   7  -5   10.20    4.60
  -3   7  -5    5.40    4.10
  -4   7  -5   -5.30    2.20
  -4   7  -5   -1.60    4.20
  -4   7  -5   -0.20    4.60
   4  -7   5    0.80    4.00
  -5   7  -5    7.20    5.10
  -5   7  -5    2.20    4.50
  -5   7  -5    4.40    5.10
  -6   7  -5   51.29   10.30
  -6   7  -5   24.20    6.20
   9   6  -5   24.90    9.10
   8   6  -5  278.87   20.80
   7   6  -5  125.19   15.80
   6   6  -5   82.29   12.60
   5   6  -5   27.50    7.60
   4   6  -5   -0.60    4.40
   3   6  -5   80.99   11.60
   2   6  -5  286.97   18.30
  -2  -6   5  291.07    7.80
   1   6  -5   22.30    6.60
   1   6  -5   22.00    3.50
  -1  -6   5   27.80    3.90
   0   6  -5 1106.49   38.40
   0   6  -5 1132.49   31.10
   0  -6   5 1128.79   31.40
  -1   6  -5  573.04   21.00
  -1   6  -5  532.95   23.80
   1  -6   5  523.45   26.50
   1  -6   5  529.15   20.60
  -2   6  -5  241.78   14.30
  -2   6  -5  243.08   15.40
   2  -6   5  234.58   14.50
   2  -6   5  224.78   14.70
  -3   6  -5  102.69   10.30
  -3   6  -5   94.89    8.90
  -3   6  -5  103.69    9.90
   3  -6   5   85.79    9.20
  -4   6  -5   40.30    7.10
  -4   6  -5   36.20    6.70
   4  -6   5   42.60    7.40
  -5   6  -5   -2.20    3.00
  -5   6  -5   -5.30    3.50
  -5   6  -5   -0.10    2.60
  -6   6  -5  103.19   14.20
  -6   6  -5  100.79   10.10
  -6   6  -5   89.09    9.40
  -7   6  -5  150.48   16.00
   9   5  -5    5.50    5.10
  -9  -5   5   12.20    3.90
   8   5  -5    6.10    2.90
   8   5  -5    6.70    5.30
  -8  -5   5    8.30    2.30
   7   5  -5   97.39   15.20
   6   5  -5   -6.20    3.80
   5   5  -5   29.10    7.70
   4   5  -5  209.28   15.40
   3   5  -5    1.00    3.70
   2   5  -5   15.20    5.10
  -2  -5   5    9.50    1.30
  -2  -5   5    8.70    4.10
   1   5  -5  629.84   26.20
   1   5  -5  683.73   18.60
  -1  -5   5  648.54   26.10
  -1  -5   5  648.74   18.70
   0   5  -5  119.59   10.70
   0   5  -5  131.99    8.10
   0  -5   5  132.79    8.30
   0  -5   5  151.88   11.60
  -1   5  -5  233.68   12.60
  -1   5  -5  249.48   14.90
   1  -5   5  248.08   14.60
   1  -5   5  258.17   13.20
  -2   5  -5   26.00    5.60
  -2   5  -5   11.00    4.30
  -2   5  -5   18.50    4.80
   2  -5   5   18.80    5.00
   2  -5   5   19.10    5.10
  -3   5  -5    0.30    3.10
  -3   5  -5    4.50    3.10
  -3   5  -5    2.30    3.40
   3  -5   5   -1.80    2.70
  -4   5  -5  178.08   14.20
  -4   5  -5  150.58   10.60
  -4   5  -5  175.48   11.60
  -5   5  -5   79.29   11.70
  -5   5  -5   62.99    7.80
  -6   5  -5   30.10    8.60
  -6   5  -5   25.40    5.10
  -6   5  -5   24.60    5.30
  -7   5  -5  244.98   19.10
  -7   5  -5  210.58    9.30
  -8   5  -5  246.38   21.10
  10   4  -5   17.40    6.60
 -10  -4   5   10.40    5.70
   9   4  -5   18.50    4.80
  -9  -4   5   25.30    5.20
   8   4  -5  121.19    8.00
   8   4  -5  112.09   12.40
  -8  -4   5  116.09    7.80
   7   4  -5   -2.50    3.00
  -7  -4   5   -1.40    1.60
   6   4  -5  170.18    6.20
   6   4  -5  161.18    6.10
   6   4  -5  164.58   13.10
  -6  -4   5  166.28    6.10
   5   4  -5  239.28   15.50
   4   4  -5   38.60    7.50
  -4  -4   5   29.40    6.60
   3   4  -5  170.58   12.80
  -3  -4   5  180.78   12.80
   2   4  -5  157.48   11.90
   2   4  -5  157.18    5.40
  -2  -4   5  159.28   11.60
  -2  -4   5  157.08    5.40
   1   4  -5 1016.10   33.70
   1   4  -5 1046.70   26.10
  -1  -4   5 1038.80   26.10
  -1  -4   5 1034.50   34.10
   0   4  -5 2759.12   68.09
   0   4  -5 2629.04   61.59
   0  -4   5 2780.02   62.19
   0  -4   5 2733.33   68.29
  -1   4  -5   51.39    7.40
  -1   4  -5   46.70    6.30
  -1   4  -5   41.20    6.40
   1  -4   5   41.10    6.70
   1  -4   5   50.89    5.90
  -2   4  -5  866.81   28.50
  -2   4  -5  893.51   29.40
  -2   4  -5  895.31   29.60
   2  -4   5  913.81   30.00
  -3   4  -5   71.99    7.10
  -3   4  -5   56.19    8.50
  -3   4  -5   55.59    7.30
   3  -4   5   70.79   10.50
  -4   4  -5    2.10    3.10
  -4   4  -5   -0.10    2.30
  -5   4  -5  212.78   11.80
  -5   4  -5  203.88   12.00
  -5   4  -5  186.38   14.90
  -6   4  -5   83.19    7.70
  -6   4  -5  114.59   13.20
  -6   4  -5   81.29    7.30
  -7   4  -5   38.90    9.60
  -7   4  -5   30.40    4.40
  -8   4  -5   56.69   10.80
 -10  -3   5  163.18   12.40
   9   3  -5  236.38   14.00
  -9  -3   5  215.38   13.00
   8   3  -5   63.29    7.10
   8   3  -5   57.49   10.00
  -8  -3   5   64.69    6.50
   7   3  -5  225.78   15.10
   7   3  -5  241.98   11.40
  -7  -3   5  228.38   10.80
   6   3  -5  187.68    8.70
   6   3  -5  180.48   13.40
  -6  -3   5  190.08    8.50
  -6  -3   5  185.48   13.40
   5   3  -5   78.99    4.70
   5   3  -5   85.69    4.70
   5   3  -5   81.79    9.00
  -5  -3   5   83.09    4.60
  -5  -3   5   81.19    8.70
   4   3  -5    9.40    4.00
   4   3  -5   16.00    1.80
   4   3  -5   12.90    1.70
  -4  -3   5   13.50    4.00
   3   3  -5  249.78   14.40
   3   3  -5  239.68    7.50
   3   3  -5  238.58    6.80
  -3  -3   5  223.68   13.70
   2   3  -5 1537.35   34.30
   2   3  -5 1566.44   44.10
  -2  -3   5 1490.45   34.20
  -2  -3   5 1630.54   44.60
   1   3  -5  457.05   19.00
   1   3  -5  503.95   20.70
   1   3  -5  508.85   15.40
  -1  -3   5  502.85   15.30
  -1  -3   5  489.95   20.50
   0   3  -5   90.89    8.60
   0   3  -5   85.59    6.60
   0   3  -5  104.49    8.30
   0  -3   5  110.69    9.20
   0  -3   5   98.49    7.00
  -1   3  -5 2661.43   63.29
  -1   3  -5 2719.03   70.79
  -1   3  -5 2611.14   64.19
   1  -3   5 2662.13   63.29
   1  -3   5 2707.53   65.89
  -2   3  -5  580.14   21.70
  -2   3  -5  527.55   23.50
  -2   3  -5  516.15   20.00
   2  -3   5  532.95   21.20
  -3   3  -5    9.50    4.30
  -3   3  -5    8.50    3.80
  -3   3  -5    3.10    2.80
   3  -3   5    1.00    3.40
  -4   3  -5   51.59    6.80
  -4   3  -5   48.30    6.70
  -4   3  -5   48.60    8.60
  -5   3  -5  323.07   14.70
  -5   3  -5  310.17   14.70
  -6   3  -5  822.92   25.80
  -6   3  -5  816.42   35.00
  -6   3  -5  834.72   25.30
  -7   3  -5  113.59    8.50
  -7   3  -5  127.19    8.00
  -7   3  -5  151.08   15.30
  -8   3  -5   44.70    9.90
  10   2  -5   -1.50    3.60
 -10  -2   5   -2.30    3.40
   9   2  -5   91.29    9.40
  -9  -2   5   63.79   10.30
  -9  -2   5   90.39    8.90
   8   2  -5  340.57   16.50
   8   2  -5  329.57   17.60
   8   2  -5  342.67   17.30
  -8  -2   5  353.46   16.30
  -8  -2   5  331.77   18.20
   7   2  -5   -2.90    2.00
   7   2  -5   -3.20    2.80
   7   2  -5    1.30    3.50
  -7  -2   5    2.40    3.20
   6   2  -5  708.93   25.40
   6   2  -5  682.83   21.60
   6   2  -5  684.13   26.10
  -6  -2   5  719.83   26.90
  -6  -2   5  685.63   21.30
   5   2  -5  224.38    9.60
   5   2  -5  221.98    9.70
   5   2  -5  233.08   13.00
   5   2  -5  218.68   13.40
  -5  -2   5  222.88    9.60
  -5  -2   5  234.58   13.80
   4   2  -5   12.60    4.10
   4   2  -5    8.60    2.20
   4   2  -5    6.40    3.30
   4   2  -5    4.60    2.00
  -4  -2   5    3.30    3.00
   3   2  -5  702.63   18.70
   3   2  -5  716.33   24.60
   3   2  -5  735.53   25.80
   3   2  -5  700.43   18.40
  -3  -2   5  744.53   25.90
   2   2  -5 2578.34   62.79
   2   2  -5 2617.24   56.19
   2   2  -5 2526.65   55.79
  -2  -2   5 2567.74   63.89
  -2  -2   5 2673.43   56.29
   1   2  -5 4506.85  101.59
   1   2  -5 4565.34   95.49
   1   2  -5 4698.03  101.29
  -1  -2   5 4442.36   95.09
  -1  -2   5 4514.65  101.99
   0   2  -5   36.20    5.20
   0   2  -5   36.30    6.10
   0   2  -5   48.40    6.70
   0  -2   5   45.70    6.70
   0  -2   5   41.10    5.30
  -1   2  -5    7.50    3.40
  -1   2  -5   10.70    3.50
  -1   2  -5   10.10    4.00
   1  -2   5   13.40    4.20
  -2   2  -5  226.18   13.00
  -2   2  -5  215.88   12.00
  -2   2  -5  226.58   12.40
   2  -2   5  215.48   11.80
   2  -2   5  211.88   12.60
  -3   2  -5  467.35   20.60
  -3   2  -5  423.26   17.70
  -3   2  -5  440.66   18.20
   3  -2   5  442.66   20.30
   3  -2   5  462.75   17.70
  -4   2  -5   67.19    7.00
  -4   2  -5   62.49    9.40
  -4   2  -5   55.29    7.10
  -5   2  -5  622.84   27.90
  -5   2  -5  619.64   22.00
  -5   2  -5  599.44   22.00
  -6   2  -5  433.36   17.70
  -6   2  -5  449.06   24.40
  -6   2  -5  408.86   17.10
  -7   2  -5   -1.20    2.90
  -7   2  -5   -5.90    2.40
  -7   2  -5    2.20    3.60
  -8   2  -5   41.20    4.90
 -11  -1   5   50.69   10.30
  10   1  -5   -1.00    3.70
 -10  -1   5   -6.00    3.20
   9   1  -5   28.40    6.30
  -9  -1   5   31.00    6.90
   8   1  -5   32.20    6.30
   8   1  -5   22.90    5.80
   8   1  -5   27.10    5.50
  -8  -1   5   31.30    6.50
  -8  -1   5   26.90    6.10
   7   1  -5  647.84   24.20
   7   1  -5  651.43   26.40
   7   1  -5  620.04   23.40
  -7  -1   5  679.33   25.10
  -7  -1   5  650.13   23.30
   6   1  -5   74.29    7.20
   6   1  -5   71.29    7.50
   6   1  -5   58.99    6.20
  -6  -1   5   73.79    6.60
  -6  -1   5   81.29    8.30
   5   1  -5    3.60    2.20
   5   1  -5    1.40    2.40
   5   1  -5   -3.70    1.70
  -5  -1   5   -2.00    2.30
  -5  -1   5    3.30    2.10
   4   1  -5    1.50    2.30
   4   1  -5    4.40    2.20
   4   1  -5    0.90    1.40
   4   1  -5    5.80    3.10
  -4  -1   5   -1.30    2.30
  -4  -1   5    2.10    2.20
   3   1  -5  299.47   14.80
   3   1  -5  314.57   14.60
   3   1  -5  303.97   11.50
   3   1  -5  305.77   11.80
  -3  -1   5  302.77   15.00
   2   1  -5    3.00    2.70
   2   1  -5    2.30    1.80
   2   1  -5   -1.50    1.70
   2   1  -5    4.90    3.50
  -2  -1   5    0.60    3.30
  -2  -1   5    0.60    2.30
   1   1  -5 2296.97   56.19
   1   1  -5 2196.78   51.49
   1   1  -5 2270.37   55.39
  -1  -1   5 2247.18   51.49
  -1  -1   5 2170.98   54.49
   0   1  -5 2477.85   60.59
   0   1  -5 2503.75   58.49
   0   1  -5 2445.76   60.99
   0  -1   5 2576.24   58.59
   0  -1   5 2541.35   60.49
  -1   1  -5  246.58   12.90
  -1   1  -5  248.78   12.90
  -1   1  -5  263.87   13.70
   1  -1   5  222.78   11.90
   1  -1   5  253.47   12.90
  -2   1  -5  620.84   22.40
  -2   1  -5  635.04   22.80
  -2   1  -5  633.74   23.60
   2  -1   5  633.64   23.40
   2  -1   5  619.44   22.00
  -3   1  -5   71.59    7.40
  -3   1  -5   60.79    7.80
  -3   1  -5   58.99    8.20
   3  -1   5   66.99    6.80
   3  -1   5   75.89    8.40
  -4   1  -5   24.90    5.90
  -4   1  -5   29.90    5.60
  -4   1  -5   30.20    6.70
   4  -1   5   25.70    5.90
  -5   1  -5    0.00    2.90
  -5   1  -5    2.10    2.90
  -5   1  -5    0.20    2.70
  -6   1  -5  329.37   18.00
  -6   1  -5  328.67   20.80
  -6   1  -5  290.17   15.10
   6  -1   5  313.37   16.80
  -7   1  -5   43.40    6.80
  -7   1  -5   66.39   11.40
  -8   1  -5    2.60    4.30
  -8   1  -5    2.00    6.00
  -9   1  -5   23.30    8.10
 -11   0   5   -2.80    4.80
  10   0  -5  149.29    9.80
 -10   0   5  185.28   14.50
   9   0  -5   10.10    3.60
   9   0  -5    2.60    3.50
  -9   0   5   12.20    4.50
   8   0  -5   79.19   10.00
   8   0  -5   93.09    7.90
  -8   0   5   85.69    9.10
   7   0  -5  150.88   10.90
   7   0  -5  141.39   10.10
   7   0  -5  162.78   12.60
  -7   0   5  160.38   11.30
   6   0  -5   74.49    7.20
   6   0  -5   72.99    7.10
   6   0  -5   59.99    6.60
  -6   0   5   76.19    7.30
   5   0  -5   77.49    7.10
   5   0  -5   76.29    7.50
   5   0  -5   81.59    7.10
  -5   0   5   90.79    7.20
   4   0  -5  471.05   18.40
   4   0  -5  488.35   19.10
   4   0  -5  463.85   16.60
   4   0  -5  458.05   17.10
  -4   0   5  476.45   17.10
   3   0  -5 1223.78   32.40
   3   0  -5 1180.58   31.70
   3   0  -5 1244.08   34.90
   3   0  -5 1221.48   35.20
  -3   0   5 1202.08   34.00
  -3   0   5 1213.78   32.20
   2   0  -5 1210.08   35.00
   2   0  -5 1213.38   31.70
   2   0  -5 1219.08   32.00
   2   0  -5 1156.38   34.10
  -2   0   5 1250.67   34.60
  -2   0   5 1202.88   32.00
   1   0  -5  552.94   18.80
   1   0  -5  537.45   20.90
   1   0  -5  584.04   20.90
  -1   0   5  533.65   20.00
  -1   0   5  568.34   18.80
   0   0  -5   68.69    6.80
   0   0  -5   74.99    7.60
   0   0   5   63.29    7.20
   0   0   5   64.29    6.20
  -1   0  -5  319.37   15.40
   1   0   5  329.77   15.10
   1   0   5  324.87   15.30
  -2   0  -5  386.66   17.30
  -2   0  -5  373.36   16.50
   2   0   5  386.16   17.20
   2   0   5  283.17   17.00
  -3   0  -5   57.89    8.60
  -3   0  -5   62.29    8.10
   3   0   5   55.69    8.30
   3   0   5   62.99    7.00
  -4   0  -5  287.37   14.90
  -4   0  -5  270.47   16.50
   4   0   5  265.27   14.30
  -5   0  -5   44.60    7.10
  -5   0  -5   41.60    7.80
   5   0   5   41.30    7.10
  -6   0  -5  450.55   24.10
  -6   0  -5  397.76   19.30
   6   0   5  430.96   18.90
  -7   0  -5   45.00   10.10
   7   0   5   47.70    7.30
  -8   0  -5   15.40    6.60
  -8   0  -5    0.60    4.60
   8   0   5    5.90    4.00
  -9   0  -5   89.09   14.30
  10  -1  -5  141.19    6.60
 -10   1   5  129.39   13.30
   9  -1  -5   43.90    5.70
   9  -1  -5   55.99    5.70
  -9   1   5   43.00    8.00
   8  -1  -5   90.99    7.50
   8  -1  -5  105.99    8.10
  -8   1   5  121.69   11.10
   7  -1  -5   68.79    6.90
   7  -1  -5   71.09    6.80
  -7   1   5   41.10    7.50
   6  -1  -5   12.00    4.00
   6  -1  -5   19.20    4.60
   6  -1  -5   14.30    3.60
  -6   1   5   12.80    4.50
   5  -1  -5   18.30    4.40
   5  -1  -5    7.20    3.30
   5  -1  -5   10.20    3.50
  -5   1   5   11.90    3.70
   4  -1  -5   10.70    3.40
   4  -1  -5   13.40    4.60
   4  -1  -5   15.30    4.00
   4  -1  -5   12.70    3.30
  -4   1   5   14.80    4.00
  -4   1   5   11.60    3.70
   3  -1  -5   99.59    8.50
   3  -1  -5  105.19    8.20
   3  -1  -5  115.69    7.90
   3  -1  -5  112.39    8.60
  -3   1   5  110.99    8.20
  -3   1   5  106.29    8.50
   2  -1  -5   61.29    6.10
   2  -1  -5   61.09    6.50
   2  -1  -5   70.59    7.50
  -2   1   5   72.89    6.70
  -2   1   5   56.99    6.40
   1  -1  -5  472.45   17.80
   1  -1  -5  472.95   19.30
   1  -1  -5  480.75   17.80
  -1   1   5  463.55   19.00
  -1   1   5  483.35   18.10
   0  -1  -5    3.70    3.30
   0  -1  -5   -1.00    2.30
   0   1   5    3.90    3.00
   0   1   5   -0.20    3.10
  -1  -1  -5  387.66   17.40
  -1  -1  -5  345.17   16.10
   1   1   5  376.36   16.50
   1   1   5  361.36   16.80
  -2  -1  -5   -0.80    1.90
  -2  -1  -5    1.60    3.30
   2   1   5   -1.30    1.70
   2   1   5   -0.40    2.30
  -3  -1  -5  131.59   10.40
  -3  -1  -5  114.59   10.00
   3   1   5  128.09   10.10
   3   1   5  106.89    9.90
  -4  -1  -5   72.09   10.20
  -4  -1  -5   67.39   10.50
   4   1   5   57.89    8.50
  -5  -1  -5  327.57   19.40
  -5  -1  -5  281.77   16.10
   5   1   5  312.17   16.70
  -6  -1  -5  154.88   14.50
  -6  -1  -5  153.88   12.20
   6   1   5  168.48   12.30
  -7  -1  -5    3.90    4.30
  -7  -1  -5   -4.20    4.40
   7   1   5   -0.20    3.30
  -8  -1  -5   32.50    9.60
   8   1   5   25.10    6.30
 -10   2   5   -0.30    4.60
   9  -2  -5   -1.20    1.90
  -9   2   5    4.40    4.20
   8  -2  -5    2.00    2.90
   8  -2  -5    3.00    2.70
  -8   2   5   -0.60    3.40
   7  -2  -5  173.18   10.40
   7  -2  -5  172.28   10.30
  -7   2   5  175.68   13.30
   6  -2  -5   75.49    7.10
   6  -2  -5   73.59    7.30
  -6   2   5   63.29    8.80
   5  -2  -5   98.19    8.00
   5  -2  -5   98.29    8.00
   5  -2  -5  103.69    8.80
  -5   2   5  102.99    8.80
  -5   2   5  114.89    8.50
   4  -2  -5  440.16   18.10
   4  -2  -5  419.76   18.60
  -4   2   5  446.26   17.80
  -4   2   5  443.76   18.60
   3  -2  -5  767.22   25.30
   3  -2  -5  796.42   26.20
   3  -2  -5  732.13   25.50
  -3   2   5  751.22   25.40
  -3   2   5  738.93   25.40
   2  -2  -5    2.80    2.80
   2  -2  -5    3.20    2.40
   2  -2  -5    4.50    2.70
  -2   2   5   10.00    3.90
   1  -2  -5  925.21   30.00
   1  -2  -5  898.81   28.10
   1  -2  -5  912.01   28.60
  -1   2   5  893.61   28.30
  -1   2   5  862.51   29.00
   0  -2  -5  458.95   19.90
   0  -2  -5  454.05   18.70
   0   2   5  453.55   19.70
   0   2   5  451.35   18.60
  -1  -2  -5   61.49    8.20
  -1  -2  -5   50.69    7.30
   1   2   5   39.00    7.20
   1   2   5   55.19    8.80
  -2  -2  -5   35.30    6.50
  -2  -2  -5   34.10    6.50
   2   2   5   51.09    8.00
   2   2   5   34.20    6.10
  -3  -2  -5   12.20    5.00
  -3  -2  -5   14.90    5.00
   3   2   5   18.30    5.30
  -4  -2  -5  367.86   20.10
  -4  -2  -5  371.96   19.40
   4   2   5  382.66   19.60
  -5  -2  -5    2.50    3.60
   5   2   5    9.20    5.20
  -6  -2  -5   31.70    8.30
   6   2   5   43.90    8.70
  -7  -2  -5   43.30    9.20
   7   2   5   48.50    8.10
  -8  -2  -5   25.30    8.30
   8   2   5   21.10    6.20
 -10   3   5   31.50    8.70
   9  -3  -5   42.70    3.30
   9  -3  -5   44.90    3.60
  -9   3   5   56.49   10.20
   8  -3  -5  113.89    7.90
   8  -3  -5  113.79    7.60
  -8   3   5  120.39   12.40
   7  -3  -5    4.20    3.30
   7  -3  -5   12.70    3.70
  -7   3   5   11.70    5.00
   6  -3  -5    0.10    2.90
   6  -3  -5    5.30    3.20
  -6   3   5    4.20    3.50
  -6   3   5    4.30    3.90
   5  -3  -5  164.28   10.90
  -5   3   5  151.38   11.90
  -5   3   5  142.49   11.10
   4  -3  -5  177.08   12.20
   4  -3  -5  182.38   12.10
   4  -3  -5  179.88   11.50
  -4   3   5  183.58   11.50
  -4   3   5  184.38   12.30
   3  -3  -5  110.79    8.70
   3  -3  -5   99.79    9.20
   3  -3  -5   82.79    8.20
  -3   3   5   84.29    8.30
  -3   3   5   88.69    8.30
   2  -3  -5  483.65   20.30
   2  -3  -5  460.15   19.50
   2  -3  -5  497.75   20.80
  -2   3   5  462.65   20.20
   1  -3  -5   34.20    6.90
   1  -3  -5   40.90    6.70
  -1   3   5   28.90    6.10
   0  -3  -5    0.70    2.10
   0  -3  -5    2.40    2.70
   0  -3  -5    0.00    2.20
   0   3   5    3.90    3.60
   0   3   5   -0.40    2.70
  -1  -3  -5   26.30    5.60
  -1  -3  -5   17.80    5.50
   1   3   5   21.20    5.20
   1   3   5   23.10    6.20
  -2  -3  -5    2.80    3.50
  -2  -3  -5   -0.50    2.90
   2   3   5   -1.70    2.50
   2   3   5   -5.00    2.90
  -3  -3  -5   46.20    8.00
   3   3   5   55.09    8.70
  -4  -3  -5   31.20    7.30
   4   3   5   41.60    8.30
  -5  -3  -5  170.88   14.10
   5   3   5  179.98   14.30
  -6  -3  -5   17.50    5.60
   6   3   5   12.90    5.80
  -7  -3  -5   35.20    9.60
   8   3   5   59.49    9.60
 -10   4   5   66.39   12.10
  -9   4   5    1.90    3.70
   8  -4  -5    3.10    2.80
   8  -4  -5    1.00    2.60
  -8   4   5    6.40    4.40
   7  -4  -5   85.59    7.90
   7  -4  -5   78.49    7.70
  -7   4   5   84.39   11.70
  -7   4   5   79.79    7.40
   6  -4  -5   46.00    7.00
  -6   4   5   42.20    8.00
  -6   4   5   47.60    7.90
   5  -4  -5 1672.13   46.20
   5  -4  -5 1692.33   50.59
  -5   4   5 1691.83   45.80
  -5   4   5 1564.54   49.00
   4  -4  -5  700.13   25.90
   4  -4  -5  698.53   27.50
  -4   4   5  651.53   24.90
  -4   4   5  648.34   26.40
   3  -4  -5   54.29    8.20
   3  -4  -5   41.10    7.40
  -3   4   5   39.10    7.20
  -3   4   5   40.50    7.20
   2  -4  -5   33.00    6.50
   2  -4  -5   32.00    6.20
   2  -4  -5   31.80    6.20
  -2   4   5   41.70    7.30
   1  -4  -5  239.68   13.90
   1  -4  -5  214.78   14.40
   1  -4  -5  212.88   13.40
  -1   4   5  246.18   15.30
  -1   4   5  217.48   13.60
   0  -4  -5  278.07   16.90
   0  -4  -5  286.27   15.90
   0  -4  -5  289.17   15.60
   0   4   5  294.17   17.30
   0   4   5  269.77   15.30
  -1  -4  -5  337.67   17.80
   1   4   5  359.26   19.70
   1   4   5  347.67   18.10
  -2  -4  -5   22.70    5.60
   2   4   5   30.30    6.60
  -3  -4  -5   19.70    6.30
   3   4   5   19.00    6.50
  -4  -4  -5   21.70    6.20
   4   4   5   18.50    6.00
  -5  -4  -5  101.89   11.70
   5   4   5   76.29   13.70
  -6  -4  -5    3.80    5.20
   6   4   5    6.60    5.50
  -7  -4  -5   54.59   10.80
   7   4   5   51.99   10.00
  -8  -4  -5   16.50    8.10
   8   4   5    5.70    6.90
   8  -5  -5  176.48   10.20
   8  -5  -5  167.98   10.00
  -8   5   5  159.08   15.60
   7  -5  -5    0.20    3.60
   7  -5  -5    2.80    3.20
  -7   5   5   -9.10    3.10
  -7   5   5   -1.10    3.80
   6  -5  -5  247.08   14.70
  -6   5   5  260.77   14.50
  -6   5   5  290.57   18.90
   5  -5  -5  678.03   26.20
  -5   5   5  701.93   26.20
   4  -5  -5   48.40    8.60
   4  -5  -5   48.90    8.10
  -4   5   5   30.90    7.00
  -4   5   5   36.20    8.00
   3  -5  -5   17.10    5.90
   3  -5  -5   19.10    5.70
  -3   5   5   15.70    5.60
  -3   5   5   19.80    5.30
   2  -5  -5  354.46   18.80
  -2   5   5  325.37   18.40
   1  -5  -5   99.79   10.10
  -1   5   5   92.09   10.50
   0  -5  -5    3.60    3.30
   0   5   5    0.70    3.30
  -1  -5  -5   86.09    9.20
   1   5   5   87.69   11.80
  -2  -5  -5  739.83   29.70
   2   5   5  778.22   33.00
  -3  -5  -5  111.99   11.70
   3   5   5  125.79   16.90
  -4  -5  -5    4.30    4.80
   4   5   5   -1.10    4.70
  -5  -5  -5   63.89   11.00
   5   5   5   91.79   13.20
  -6  -5  -5   -1.10    5.30
   6   5   5    0.30    5.10
  -7  -5  -5   39.20    9.50
   7   5   5   50.19    9.70
  -9   6   5    2.50    6.20
   8  -6  -5    2.30    5.40
  -8   6   5   11.20    6.40
  -8   6   5    1.10    4.40
  -7   6   5    6.30    5.40
  -7   6   5   11.20    5.00
   6  -6  -5  149.39   11.60
   6  -6  -5  142.99   13.90
  -6   6   5  137.19   13.60
  -6   6   5  135.89   11.30
   5  -6  -5   96.69   13.20
   5  -6  -5  124.29   11.80
  -5   6   5  114.09   12.70
  -5   6   5  124.89   11.10
   4  -6  -5  601.04   28.10
  -4   6   5  563.24   25.50
  -4   6   5  540.85   26.20
   3  -6  -5    9.80    5.10
  -3   6   5   13.00    5.60
  -3   6   5   12.80    5.40
   2  -6  -5   -0.20    2.20
  -2   6   5   -2.20    3.10
   1  -6  -5  377.96   20.40
  -1   6   5  356.66   21.40
   0  -6  -5   39.70    8.30
   0   6   5   41.20    8.80
  -1  -6  -5   91.09   12.00
  -2  -6  -5  454.65   23.10
   2   6   5  439.16   25.20
  -3  -6  -5  349.87   20.70
   3   6   5  343.27   22.90
  -4  -6  -5   15.80    5.60
   4   6   5    9.00    6.90
  -5  -6  -5    5.60    5.50
   5   6   5    2.30    4.70
  -6  -6  -5   19.40    6.80
   6   6   5   18.50    8.40
   8  -7  -5   -2.70    3.90
  -8   7   5   -8.20    5.10
  -8   7   5    4.90    5.40
   7  -7  -5   18.00    7.20
   7  -7  -5   19.90    8.10
  -7   7   5   29.00    9.50
  -7   7   5   20.20    6.40
   6  -7  -5    0.00    4.20
  -6   7   5    7.70    6.10
  -6   7   5    9.10    4.70
   5  -7  -5  228.28   18.40
  -5   7   5  234.38   16.10
  -5   7   5  220.08   17.40
   4  -7  -5   -4.40    2.60
  -4   7   5   -3.10    3.60
  -4   7   5    0.40    4.70
   3  -7  -5  251.17   17.90
  -3   7   5  261.07   18.40
  -3   7   5  259.27   18.20
   2  -7  -5   38.00    8.30
   1  -7  -5    0.90    2.70
  -1   7   5    1.80    4.60
   0  -7  -5  122.49   12.30
   0   7   5  120.39   13.20
  -1  -7  -5    5.60    4.20
   1   7   5   10.90    6.20
  -2  -7  -5   83.69   12.40
   2   7   5   72.99   13.10
  -3  -7  -5    8.40    5.40
   3   7   5   14.00    6.70
  -4  -7  -5   36.00    8.70
   4   7   5   37.20   10.20
  -5  -7  -5  -10.50    4.00
   5   7   5    3.60    6.50
  -6  -7  -5    7.20    6.40
   6   7   5   12.70    7.00
   7  -8  -5   70.29   13.70
  -7   8   5   77.59   13.80
   6  -8  -5  154.68   22.00
  -6   8   5  184.18   15.00
   5  -8  -5   -0.90    4.90
  -5   8   5   -1.40    2.80
   4  -8  -5    0.50    5.30
  -4   8   5   -3.10    4.10
  -4   8   5    3.90    5.10
   3  -8  -5   17.10    6.80
  -3   8   5   14.60    5.90
  -3   8   5   13.70    6.80
   2  -8  -5  313.57   20.50
  -2   8   5  310.17   21.80
  -1   8   5   26.90    8.40
   0  -8  -5   31.20    8.00
   0   8   5   55.89   11.20
  -1  -8  -5   99.29   13.60
   1   8   5   98.29   14.80
  -2  -8  -5   27.80    7.40
   2   8   5   21.00    9.00
  -3  -8  -5  108.39   14.50
   3   8   5  107.09   15.80
  -4  -8  -5   17.40    7.20
   4   8   5   30.10    8.90
  -5  -8  -5   27.10    9.20
   5   8   5   37.50   11.20
   6  -9  -5   69.89   13.10
  -6   9   5   55.49   10.90
  -6   9   5   62.79   13.00
   5  -9  -5   19.90    7.50
  -5   9   5   17.00    6.40
  -5   9   5   12.30    6.30
   4  -9  -5   60.09   12.60
  -4   9   5   62.79   11.20
  -4   9   5   69.89   11.80
   3  -9  -5   -7.20    4.40
  -3   9   5   17.50    8.00
   2  -9  -5    7.90    6.90
  -2   9   5   26.30    8.50
   1  -9  -5   51.29   10.50
  -1   9   5   43.90   10.40
   0  -9  -5    3.20    5.00
   0   9   5   -7.40    4.90
  -1  -9  -5    5.00    5.70
   1   9   5    4.10    6.40
  -2  -9  -5  239.78   18.40
   2   9   5  177.98   19.70
  -3  -9  -5   39.40   11.00
   3   9   5   41.40   11.10
   4 -10  -5    6.80    6.20
  -4  10   5   -0.80    6.40
  -4  10   5    7.10    5.20
   3 -10  -5   50.09   10.90
  -3  10   5   25.20    8.90
   2 -10  -5   -2.10    5.30
  -2  10   5   -8.90    5.70
   1 -10  -5   10.90    6.40
  -1  10   5    7.20    7.30
   0 -10  -5   85.69   14.10
   0  10   5   74.39   13.30
  -1 -10  -5  187.58   17.70
   1  10   5  209.68   20.50
   4  10  -6   25.40    9.30
   1  10  -6    0.80    5.60
   1  10  -6   -1.30    2.80
  -1 -10   6   -3.40    3.70
   0  10  -6    3.10    6.30
   0  10  -6    7.30    4.30
  -1  10  -6    2.30    6.60
  -1  10  -6    2.00    3.50
  -2  10  -6    9.90    5.00
  -2  10  -6   -0.20    6.40
  -3  10  -6   13.80    6.10
  -3  10  -6    0.30    6.80
   6   9  -6   28.70    8.90
   5   9  -6  168.78   17.50
   4   9  -6   23.30    9.00
   3   9  -6    9.00    6.00
   2   9  -6   70.79   13.10
   1   9  -6    3.00    2.60
   1   9  -6    2.80    5.80
  -1  -9   6   -2.80    3.30
  -1  -9   6    0.00    2.70
   0   9  -6  297.17   14.70
   0   9  -6  300.37   22.10
  -1   9  -6   69.39    9.30
  -1   9  -6   54.89   10.80
  -2   9  -6  103.29   10.50
  -2   9  -6  131.39   14.10
  -3   9  -6    4.90    3.80
  -3   9  -6   -4.60    5.10
  -4   9  -6  187.68   16.70
  -4   9  -6  242.48   17.60
   7   8  -6   47.10   12.20
   6   8  -6  245.98   20.60
   5   8  -6   10.60    7.30
   4   8  -6  682.43   34.50
   3   8  -6  462.85   27.40
   2   8  -6    5.30    4.50
  -2  -8   6    2.70    1.30
   1   8  -6  148.79   15.00
   1   8  -6  125.79    7.80
  -1  -8   6  144.79    8.80
   0   8  -6   36.30    5.90
   0   8  -6   34.80    8.10
   0  -8   6   24.90    5.90
  -1   8  -6    3.40    3.20
  -1   8  -6   -7.40    3.50
   1  -8   6    1.30    4.90
  -2   8  -6    6.90    5.60
  -2   8  -6    5.40    4.00
  -3   8  -6  239.08   16.40
  -3   8  -6  227.58   19.50
  -4   8  -6   76.89   10.80
  -4   8  -6   63.49   10.60
  -5   8  -6    0.70    5.70
  -5   8  -6   20.20    7.50
   8   7  -6    2.70    6.00
   7   7  -6    9.00    6.40
   6   7  -6  581.74   31.50
   5   7  -6   24.90    8.00
   4   7  -6   10.40    5.30
   3   7  -6    1.80    5.20
   2   7  -6  281.67   19.70
  -2  -7   6  257.37    7.70
  -2  -7   6  278.07   10.70
   1   7  -6  367.86   13.60
  -1  -7   6  373.46   14.00
   0   7  -6  390.66   18.20
   0   7  -6  356.16   21.20
   0  -7   6  414.46   17.00
  -1   7  -6  254.37   14.20
  -1   7  -6  266.07   18.10
   1  -7   6  247.48   14.20
  -2   7  -6   27.90    6.30
  -2   7  -6   30.40    7.50
  -3   7  -6  733.73   30.10
  -3   7  -6  749.82   30.20
  -4   7  -6   58.99    9.80
  -4   7  -6   48.00    9.00
  -5   7  -6    2.90    4.60
  -6   7  -6    4.20    4.20
  -6   7  -6    2.30    6.50
   9   6  -6   28.20    8.50
   8   6  -6   96.79   14.90
   7   6  -6  164.68   15.70
   6   6  -6  583.14   29.70
   5   6  -6   43.50    9.50
   4   6  -6  128.79   13.30
   3   6  -6  234.38   17.50
   2   6  -6  634.94   15.60
   2   6  -6  661.73   29.30
  -2  -6   6  654.53   15.80
   1   6  -6  192.58   14.80
   1   6  -6  183.88    8.90
  -1  -6   6  185.38    9.20
   0   6  -6    8.70    3.60
   0   6  -6    9.80    4.70
   0  -6   6    9.80    3.70
  -1   6  -6  176.48   13.80
  -1   6  -6  158.48   10.90
   1  -6   6  165.78   13.60
  -2   6  -6  166.18   12.30
  -2   6  -6  158.88   12.80
  -3   6  -6    3.10    3.90
  -3   6  -6    7.70    3.90
  -4   6  -6   11.20    5.10
  -4   6  -6    3.00    4.50
  -4   6  -6    9.90    5.30
  -5   6  -6   30.80    7.60
  -5   6  -6   33.40    6.90
  -5   6  -6   33.60    8.20
  -6   6  -6  243.28   19.20
  -6   6  -6  227.78   14.10
  -7   6  -6    8.70    5.40
   9   5  -6   32.20    8.90
   8   5  -6   59.69   11.40
   7   5  -6  129.09   13.70
   5   5  -6  464.45   24.50
   4   5  -6  207.88   15.80
   3   5  -6 1905.41   56.59
   2   5  -6  310.77   18.40
   2   5  -6  260.17    8.60
  -2  -5   6  281.37    8.90
   1   5  -6  390.26   13.80
   1   5  -6  371.36   20.10
  -1  -5   6  396.26   14.00
   0   5  -6  201.08   10.80
   0   5  -6  182.38   13.60
   0  -5   6  198.48   10.70
  -1   5  -6   70.29    9.00
  -1   5  -6   72.09    7.20
  -1   5  -6   74.89    9.90
   1  -5   6   64.99    7.20
   1  -5   6   56.99    9.00
  -2   5  -6  928.51   32.80
  -2   5  -6  892.61   31.50
  -2   5  -6  963.70   32.00
   2  -5   6  950.90   33.60
   2  -5   6  925.31   32.00
  -3   5  -6   50.29    8.10
  -3   5  -6   47.10    8.40
  -3   5  -6   36.10    6.80
   3  -5   6   46.00    7.70
  -4   5  -6  161.88   13.90
  -4   5  -6  119.69   11.00
  -4   5  -6  153.38   11.90
  -5   5  -6   62.79    8.60
  -5   5  -6   50.19   10.00
  -6   5  -6   11.10    5.40
  -6   5  -6    8.50    4.70
  -6   5  -6   21.50    7.90
  -7   5  -6  113.49    9.80
  -7   5  -6  151.58   16.10
  10   4  -6   11.50    6.80
   9   4  -6   15.70    7.10
  -9  -4   6   13.60    3.90
   8   4  -6   49.50    5.10
   8   4  -6   48.30   11.10
   8   4  -6   46.50    5.10
   7   4  -6  146.99    6.50
   7   4  -6  144.39   13.50
   7   4  -6  138.79    6.40
   6   4  -6  936.21   35.80
   5   4  -6  724.23   29.90
   4   4  -6    2.80    4.30
   3   4  -6    1.10    0.60
   3   4  -6    4.30    4.00
   3   4  -6    0.30    0.50
   2   4  -6  194.88    7.80
   2   4  -6  175.68   13.30
  -2  -4   6  191.58    7.60
  -2  -4   6  197.48   13.80
   1   4  -6   24.30    5.20
   1   4  -6   16.40    5.40
   1   4  -6   17.80    3.30
  -1  -4   6   22.00    3.80
  -1  -4   6   12.50    4.40
   0   4  -6   46.50    5.30
   0   4  -6   46.00    7.60
   0   4  -6   47.10    7.60
   0  -4   6   37.40    7.00
   0  -4   6   43.90    6.00
  -1   4  -6  163.98   11.60
  -1   4  -6  185.58   11.30
  -1   4  -6  173.78   12.50
   1  -4   6  177.58   11.40
   1  -4   6  166.08   12.30
  -2   4  -6  568.14   23.40
  -2   4  -6  557.04   22.70
  -2   4  -6  574.14   23.20
   2  -4   6  580.04   23.30
   2  -4   6  528.05   23.10
  -3   4  -6  122.59   11.20
  -3   4  -6   92.09    9.30
  -3   4  -6  102.09    9.50
  -4   4  -6   -3.10    3.00
  -4   4  -6   -1.40    3.20
  -5   4  -6  218.18   13.70
  -5   4  -6  224.58   17.10
  -5   4  -6  216.48   13.20
  -6   4  -6   48.50   10.20
  -6   4  -6   27.40    6.10
  -6   4  -6   31.40    5.90
  -7   4  -6   48.30    6.70
  10   3  -6   -8.90    4.70
 -10  -3   6    0.10    4.40
   9   3  -6    9.80    4.80
   9   3  -6    8.50    4.70
  -9  -3   6    4.00    3.30
   8   3  -6   96.19    7.90
   8   3  -6  116.69   12.10
  -8  -3   6   86.69    8.60
   7   3  -6  196.48   14.60
   7   3  -6  185.58    9.70
   7   3  -6  191.08    9.80
  -7  -3   6  203.88    9.70
   6   3  -6  806.32   31.20
   6   3  -6  816.72   22.20
  -6  -3   6  798.02   21.70
   5   3  -6   30.40    3.20
   5   3  -6   26.80    6.40
   5   3  -6   29.60    3.10
   4   3  -6  357.46   18.80
   4   3  -6  351.26   10.60
   4   3  -6  375.26   18.20
   4   3  -6  359.16   10.90
  -4  -3   6  392.96   19.60
   3   3  -6  179.28    7.30
   3   3  -6  195.28   12.70
   3   3  -6  178.18    7.00
   3   3  -6  176.58   12.50
  -3  -3   6  172.98   12.60
   2   3  -6    6.40    3.70
   2   3  -6    4.00    2.70
   2   3  -6    0.90    1.60
  -2  -3   6   -0.50    3.00
  -2  -3   6    1.60    1.70
   1   3  -6  159.68   11.60
   1   3  -6  153.28   11.00
   1   3  -6  164.78    8.80
  -1  -3   6  162.88    8.70
  -1  -3   6  146.69   11.60
   0   3  -6  297.87   16.00
   0   3  -6  254.07   14.70
   0   3  -6  293.67   13.10
   0  -3   6  265.07   12.60
   0  -3   6  267.37   15.60
  -1   3  -6  110.49    8.60
  -1   3  -6  109.89    9.80
   1  -3   6  121.89    9.30
  -2   3  -6  317.17   16.30
  -2   3  -6  330.07   18.80
  -2   3  -6  286.07   15.60
   2  -3   6  304.87   16.10
  -3   3  -6   11.60    4.20
  -3   3  -6   17.40    4.90
  -3   3  -6   14.80    4.60
  -4   3  -6  174.38   12.00
  -4   3  -6  161.08   13.60
  -4   3  -6  184.28   12.40
  -5   3  -6  222.88   13.30
  -5   3  -6  228.68   13.70
  -5   3  -6  217.78   16.30
  -6   3  -6  141.49   14.40
  -6   3  -6  150.48   10.70
  -6   3  -6  144.69   11.20
  -7   3  -6   28.00    8.50
  -7   3  -6   16.00    8.00
  -8   3  -6   90.69   14.30
 -10  -2   6   -8.60    3.40
   9   2  -6    1.00    3.80
  -9  -2   6    9.10    4.30
   8   2  -6   36.60    7.30
  -8  -2   6   40.70    6.50
   7   2  -6    4.00    4.40
   7   2  -6   -3.80    2.20
   7   2  -6    1.50    2.90
  -7  -2   6   -0.50    3.90
   6   2  -6    9.60    4.30
   6   2  -6   14.90    3.70
   6   2  -6   15.50    5.60
   6   2  -6    6.20    2.60
  -6  -2   6    7.60    4.80
  -6  -2   6    9.80    3.10
   5   2  -6   -1.20    1.70
   5   2  -6    0.20    2.90
   5   2  -6    0.50    3.00
   5   2  -6    0.60    1.70
  -5  -2   6    0.30    1.90
  -5  -2   6    1.20    3.50
   4   2  -6  661.43   19.20
   4   2  -6  667.23   18.90
   4   2  -6  652.93   25.70
   4   2  -6  651.83   24.90
  -4  -2   6  666.03   26.00
   3   2  -6   57.59    8.20
   3   2  -6   57.69    4.90
   3   2  -6   68.89    7.60
   3   2  -6   52.89    4.40
  -3  -2   6   54.79    8.20
   2   2  -6 1127.39   38.50
   2   2  -6 1137.89   29.00
   2   2  -6 1043.20   34.50
  -2  -2   6 1055.39   38.70
  -2  -2   6 1119.49   28.90
   1   2  -6  834.42   28.20
   1   2  -6  844.32   24.40
   1   2  -6  788.42   28.20
  -1  -2   6  776.02   28.30
  -1  -2   6  784.82   23.60
   0   2  -6 1289.47   38.80
   0   2  -6 1306.07   35.60
   0   2  -6 1275.17   38.00
   0  -2   6 1239.08   34.90
  -1   2  -6   43.30    7.00
  -1   2  -6   50.39    7.50
  -1   2  -6   58.89    7.60
   1  -2   6   64.09    7.00
   1  -2   6   53.09    7.30
  -2   2  -6   84.89    8.70
  -2   2  -6   77.19    7.90
  -2   2  -6  103.79    9.30
   2  -2   6   86.99    8.20
   2  -2   6  100.89    9.30
  -3   2  -6   24.50    6.10
  -3   2  -6   15.00    4.70
  -3   2  -6   20.40    5.60
   3  -2   6   17.90    4.70
  -4   2  -6   18.70    4.90
  -4   2  -6   23.40    6.70
  -4   2  -6   23.40    5.50
   4  -2   6   22.70    5.70
  -5   2  -6  255.07   15.00
  -5   2  -6  236.18   17.30
  -5   2  -6  226.38   13.80
  -6   2  -6    3.20    3.90
  -6   2  -6    3.60    4.20
  -6   2  -6   -1.00    4.30
  -7   2  -6   60.49    8.70
  -7   2  -6   47.40   10.70
  -7   2  -6   78.79    8.50
  -8   2  -6  116.29   16.50
  10   1  -6  122.99   11.20
 -10  -1   6  132.39   12.30
   9   1  -6   -8.30    3.40
   9   1  -6    5.80    3.90
  -9  -1   6    0.60    3.00
   8   1  -6   48.50    7.70
   8   1  -6   40.00    6.70
   8   1  -6   56.69    8.50
  -8  -1   6   51.59    7.90
   7   1  -6  410.06   19.00
   7   1  -6  411.46   19.50
  -7  -1   6  413.66   17.80
   6   1  -6   38.00    7.20
   6   1  -6   42.30    7.00
   6   1  -6   46.40    6.30
   6   1  -6   42.70    7.10
  -6  -1   6   35.70    7.20
  -6  -1   6   49.50    7.70
   5   1  -6    7.60    2.80
   5   1  -6    8.10    3.70
   5   1  -6    4.30    3.60
   5   1  -6   10.90    3.10
  -5  -1   6    6.80    4.40
  -5  -1   6   10.50    3.40
   4   1  -6   14.60    3.60
   4   1  -6   21.40    5.10
   4   1  -6   19.60    4.80
   4   1  -6   20.70    3.70
  -4  -1   6   11.40    4.40
   3   1  -6   87.79    6.30
   3   1  -6   91.29    6.80
   3   1  -6   92.19    8.40
   3   1  -6   83.29    8.80
   2   1  -6   72.49    7.80
   2   1  -6   69.69    7.30
   2   1  -6   73.99    5.90
   2   1  -6   84.89    6.70
  -2  -1   6   71.19    6.10
  -2  -1   6   80.49    8.30
   1   1  -6   -0.30    2.20
   1   1  -6    1.70    3.40
   1   1  -6   -0.30    2.40
  -1  -1   6   -0.50    2.00
  -1  -1   6    1.40    2.20
   0   1  -6    5.60    3.20
   0   1  -6    3.80    2.80
   0   1  -6    6.60    3.60
   0  -1   6    9.90    3.80
   0  -1   6    5.00    2.80
  -1   1  -6   22.80    5.60
  -1   1  -6   18.40    4.70
  -1   1  -6   27.40    5.60
   1  -1   6   25.10    5.30
   1  -1   6   18.70    4.50
  -2   1  -6   41.10    7.20
  -2   1  -6   27.40    6.00
  -2   1  -6   25.10    5.40
   2  -1   6   40.70    6.30
   2  -1   6   21.60    5.30
  -3   1  -6  186.18   13.50
  -3   1  -6  163.88   13.30
  -3   1  -6  175.38   12.60
   3  -1   6  197.68   12.30
  -4   1  -6    5.20    3.40
  -4   1  -6   -2.70    3.90
  -4   1  -6    1.00    3.20
   4  -1   6   -1.30    3.40
  -5   1  -6  144.09   11.10
  -5   1  -6  127.49   11.40
  -5   1  -6  139.69   13.60
   5  -1   6  129.19   10.70
  -6   1  -6  333.37   21.50
  -6   1  -6  320.67   17.70
  -6   1  -6  323.77   17.20
   6  -1   6  361.06   17.20
  -7   1  -6  202.98   18.20
  -7   1  -6  195.98   13.30
  -7   1  -6  185.48   14.10
   7  -1   6  209.08   12.70
  -8   1  -6   45.80   10.80
  -8   1  -6    8.90    5.70
  10   0  -6  242.18   13.70
 -10   0   6  263.77   17.20
   9   0  -6   13.20    5.00
  -9   0   6   28.00    6.60
   8   0  -6   11.60    4.80
  -8   0   6   14.60    5.00
   7   0  -6  231.68   13.80
   7   0  -6  221.68   13.50
  -7   0   6  234.68   13.70
   6   0  -6  361.76   17.60
   6   0  -6  347.17   16.50
   6   0  -6  362.46   17.30
  -6   0   6  340.77   16.20
   5   0  -6  214.98   12.80
   5   0  -6  221.78   13.30
   5   0  -6  224.18   11.80
   5   0  -6  222.68   12.50
  -5   0   6  206.58   11.60
   4   0  -6   15.40    3.90
   4   0  -6   11.60    3.40
   4   0  -6   12.40    4.00
   4   0  -6    9.40    3.80
  -4   0   6   12.40    3.60
   3   0  -6 1961.10   49.60
   3   0  -6 2079.49   50.79
   3   0  -6 2094.69   54.79
   3   0  -6 2012.40   53.49
  -3   0   6 2140.29   53.79
   2   0  -6 1873.11   47.50
   2   0  -6 1849.52   47.00
   2   0  -6 1929.31   51.69
   2   0  -6 1933.01   50.89
  -2   0   6 1899.61   50.39
  -2   0   6 1942.41   47.90
   1   0  -6    5.00    3.20
   1   0  -6    5.10    3.70
   1   0  -6   10.90    4.30
  -1   0   6   10.20    3.50
  -1   0   6    7.90    3.80
   0   0  -6  161.18   10.60
   0   0  -6  152.18   10.90
   0   0   6  152.18   10.70
   0   0   6  161.18   10.20
  -1   0  -6  121.29   10.10
  -1   0  -6  143.89   10.90
   1   0   6  145.39   10.60
  -2   0  -6    0.40    3.10
   2   0   6    6.40    3.90
   2   0   6    5.40    3.50
  -3   0  -6   85.79    9.20
  -3   0  -6  101.19    9.80
   3   0   6  115.99    9.90
  -4   0  -6    6.50    4.80
  -4   0  -6   -1.70    3.40
   4   0   6   -1.20    3.30
  -5   0  -6  961.40   34.20
  -5   0  -6  991.60   38.30
   5   0   6 1058.59   34.40
  -6   0  -6  183.08   16.30
  -6   0  -6  186.38   14.30
   6   0   6  204.38   13.60
  -7   0  -6  368.16   19.30
  -7   0  -6  347.97   22.40
  -7   0  -6  392.56   24.90
   7   0   6  398.96   19.00
  -8   0  -6   -2.80    5.00
  10  -1  -6   -3.50    3.10
 -10   1   6   -2.20    4.30
   9  -1  -6  187.68   16.70
   9  -1  -6  175.28   11.10
  -9   1   6  175.08   14.50
   8  -1  -6  362.66   16.90
   8  -1  -6  354.86   16.70
  -8   1   6  365.86   19.50
   7  -1  -6  498.35   20.60
   7  -1  -6  512.35   20.70
  -7   1   6  489.65   21.80
   6  -1  -6    9.30    3.90
   6  -1  -6   15.50    5.00
   6  -1  -6   13.20    4.70
   6  -1  -6   15.00    4.10
  -6   1   6   14.30    4.80
   5  -1  -6   -0.60    2.40
   5  -1  -6   -2.30    2.60
   5  -1  -6   -0.40    2.50
   5  -1  -6   -3.10    2.00
  -5   1   6    1.60    2.60
  -5   1   6    2.40    3.00
   4  -1  -6  244.08   13.70
   4  -1  -6  279.67   14.90
   4  -1  -6  249.68   12.90
   4  -1  -6  230.88   13.10
  -4   1   6  229.68   12.80
  -4   1   6  250.87   13.70
   3  -1  -6 1384.96   39.90
   3  -1  -6 1222.28   37.90
   3  -1  -6 1276.47   36.80
   3  -1  -6 1312.77   36.30
  -3   1   6 1267.67   37.80
   2  -1  -6  278.27   15.00
   2  -1  -6  278.37   13.60
   2  -1  -6  282.07   14.00
  -2   1   6  306.67   15.60
  -2   1   6  278.57   13.90
   1  -1  -6    2.20    3.10
   1  -1  -6   -1.10    1.70
  -1   1   6    2.10    2.80
   0  -1  -6   -0.90    2.00
   0   1   6   -2.60    2.60
   0   1   6    0.90    2.30
  -1  -1  -6    3.20    3.20
  -1  -1  -6    6.90    4.10
   1   1   6   -3.40    2.20
   1   1   6    4.10    3.70
  -2  -1  -6    3.00    2.90
  -2  -1  -6   -1.40    3.00
   2   1   6    2.00    3.40
   2   1   6   12.70    4.30
  -3  -1  -6    2.60    3.70
  -3  -1  -6    8.90    5.00
   3   1   6    1.00    3.40
  -4  -1  -6  517.45   25.30
  -4  -1  -6  547.05   24.40
   4   1   6  584.94   24.50
  -5  -1  -6   15.70    6.80
   5   1   6   27.70    6.40
  -6  -1  -6   37.20    8.70
   6   1   6   46.00    8.00
  -7  -1  -6   36.10    9.20
   7   1   6   29.00    6.50
  -8  -1  -6   31.90    9.50
   8   1   6    7.80    5.50
 -10   2   6   15.30    6.50
   9  -2  -6  537.15   20.10
  -9   2   6  588.34   27.70
   8  -2  -6  451.65   19.00
   8  -2  -6  447.96   25.90
  -8   2   6  475.35   23.50
   7  -2  -6    9.80    4.50
   7  -2  -6    7.70    4.00
  -7   2   6   10.70    4.80
   6  -2  -6    4.90    4.20
   6  -2  -6   -0.40    3.30
   6  -2  -6    8.50    4.30
  -6   2   6   -0.50    2.90
  -6   2   6    7.30    3.90
   5  -2  -6   69.39    8.10
   5  -2  -6  105.69    9.10
   5  -2  -6   81.89    8.80
   5  -2  -6   99.89    8.90
  -5   2   6  104.19    8.90
  -5   2   6   95.09    9.20
   4  -2  -6   43.80    7.00
   4  -2  -6   55.39    7.80
   4  -2  -6   55.19    7.60
   4  -2  -6   51.49    7.80
  -4   2   6   44.30    7.30
  -4   2   6   56.79    7.80
   3  -2  -6  757.02   26.90
   3  -2  -6  777.12   31.30
   3  -2  -6  749.62   26.10
  -3   2   6  783.92   27.60
   2  -2  -6   83.09   11.60
   2  -2  -6   89.59    8.20
   2  -2  -6   80.89    7.80
  -2   2   6   97.69    9.30
  -2   2   6   88.79    8.10
   1  -2  -6   12.40    4.30
   1  -2  -6   13.60    3.90
   1  -2  -6   18.90    4.90
  -1   2   6    9.00    3.60
  -1   2   6   20.10    4.80
   0  -2  -6  511.95   21.20
   0  -2  -6  498.95   22.20
   0   2   6  476.75   21.50
   0   2   6  505.35   21.00
  -1  -2  -6   38.20    7.00
  -1  -2  -6   29.00    6.50
   1   2   6   43.80    7.70
   1   2   6   37.80    6.90
  -2  -2  -6   53.89    8.60
  -2  -2  -6   60.99    8.90
   2   2   6   52.79    8.90
  -3  -2  -6  316.87   18.50
   3   2   6  375.46   19.70
  -4  -2  -6  685.43   30.90
   4   2   6  750.62   30.00
  -5  -2  -6  147.89   14.50
   5   2   6  157.68   13.20
  -6  -2  -6  554.64   28.70
   6   2   6  568.24   26.30
  -7  -2  -6   73.79   13.30
   7   2   6  100.59   10.80
  -8  -2  -6  235.08   20.40
   8   2   6  220.38   16.50
 -10   3   6   93.19   14.10
   9  -3  -6    1.00    3.20
   9  -3  -6    6.40    4.00
  -9   3   6   20.40    6.50
   8  -3  -6  113.69    9.00
  -8   3   6  112.29   11.70
   7  -3  -6  118.89   10.00
   7  -3  -6  121.39    9.80
  -7   3   6   94.99   10.20
   6  -3  -6  196.08   12.90
   6  -3  -6  185.48   14.20
   6  -3  -6  167.78   11.80
  -6   3   6  201.98   14.60
  -6   3   6  200.48   12.30
   5  -3  -6  292.67   17.00
   5  -3  -6  250.37   17.10
  -5   3   6  296.67   16.90
  -5   3   6  287.17   15.40
   4  -3  -6 1359.86   42.30
   4  -3  -6 1304.27   40.80
  -4   3   6 1374.26   41.80
  -4   3   6 1366.06   40.80
   3  -3  -6   91.49    9.00
   3  -3  -6   99.99    9.60
   3  -3  -6  119.89   10.10
  -3   3   6   98.99    9.30
   2  -3  -6    4.70    3.40
   2  -3  -6    2.20    3.20
   2  -3  -6    2.00    2.80
  -2   3   6   -2.10    2.80
  -2   3   6    2.40    2.50
   1  -3  -6  783.02   28.40
   1  -3  -6  722.23   28.60
   1  -3  -6  785.92   27.90
  -1   3   6  789.52   29.50
  -1   3   6  758.92   28.00
   0  -3  -6  103.69    9.90
   0  -3  -6   96.19    9.20
   0  -3  -6  101.89    9.90
   0   3   6   99.19    9.20
   0   3   6  100.99   10.00
  -1  -3  -6   44.10    7.50
   1   3   6   35.50    8.00
  -2  -3  -6  252.17   16.00
   2   3   6  223.88   16.00
  -3  -3  -6  588.54   26.60
   3   3   6  588.84   27.10
  -4  -3  -6  395.76   22.10
   4   3   6  378.36   21.80
  -5  -3  -6   -3.70    4.10
   5   3   6    8.10    4.70
  -6  -3  -6   25.60    7.90
   6   3   6   48.90    9.20
  -7  -3  -6  269.87   20.50
   7   3   6  276.47   18.90
 -10   4   6   38.00    9.70
   9  -4  -6  187.48   10.30
  -9   4   6  217.28   17.30
   8  -4  -6    0.00    3.40
   8  -4  -6   -2.70    2.90
  -8   4   6    0.30    4.00
   7  -4  -6   26.10    6.00
   7  -4  -6   19.80    5.60
  -7   4   6   15.90    6.60
  -7   4   6   18.00    5.00
   6  -4  -6    1.20    4.30
   6  -4  -6   -5.10    2.90
   6  -4  -6    2.30    3.60
  -6   4   6    3.40    3.20
  -6   4   6    7.80    3.50
   5  -4  -6  308.87   18.70
   5  -4  -6  278.67   16.10
  -5   4   6  298.47   18.10
  -5   4   6  281.57   16.10
   4  -4  -6    2.10    2.90
   4  -4  -6    2.10    3.80
  -4   4   6    5.70    4.30
  -4   4   6    5.50    4.00
   3  -4  -6    1.80    3.70
   3  -4  -6    2.00    3.20
  -3   4   6    2.70    2.90
   2  -4  -6   62.89    9.20
  -2   4   6   62.29    9.30
   1  -4  -6   35.20    7.00
  -1   4   6   38.80    7.50
   0  -4  -6  277.87   16.60
   0   4   6  266.77   17.50
  -1  -4  -6   -0.20    2.10
   1   4   6   -0.10    2.90
  -2  -4  -6 1169.88   40.60
   2   4   6 1224.48   43.10
   3   4   6  630.54   29.70
  -4  -4  -6   18.80    6.50
   4   4   6   31.00    8.60
  -5  -4  -6  302.07   20.60
   5   4   6  335.87   21.50
  -6  -4  -6   11.30    6.30
   6   4   6    8.20    5.70
  -7  -4  -6  194.78   21.70
   7   4   6  251.77   19.50
  -9   5   6   -0.50    4.90
   8  -5  -6  157.68   11.50
   8  -5  -6  159.48   11.40
  -8   5   6  165.18   15.70
   7  -5  -6  112.39   10.60
   7  -5  -6  117.19   11.10
   7  -5  -6   90.69   13.00
  -7   5   6  144.69   14.20
  -7   5   6  131.59   10.60
   6  -5  -6   39.60    7.30
   6  -5  -6   28.50    8.10
  -6   5   6   42.30    7.80
  -6   5   6   32.00    7.60
   5  -5  -6  224.38   17.10
  -5   5   6  221.58   14.80
  -5   5   6  228.38   16.80
  -4   5   6    4.10    4.10
   3  -5  -6  136.39   12.20
  -3   5   6  123.69   12.00
   2  -5  -6   23.60    6.50
  -2   5   6   22.70    6.40
   1  -5  -6  119.29   11.00
  -1   5   6   96.49   10.80
   0  -5  -6   21.80    5.70
   0   5   6    7.20    5.20
  -1  -5  -6   33.40    7.80
   1   5   6   37.50    8.70
   2   5   6  163.18   15.30
  -3  -5  -6   44.50    9.40
   3   5   6   51.59   10.00
  -4  -5  -6    2.50    4.60
   4   5   6    2.50    3.90
  -5  -5  -6   10.20    5.50
   5   5   6   -5.20    4.50
  -6  -5  -6  270.67   20.70
   6   5   6  206.88   18.90
  -9   6   6   33.70   10.60
   8  -6  -6    3.90    4.80
   8  -6  -6    1.30    4.20
  -8   6   6   20.90    7.50
  -8   6   6    8.30    5.50
   7  -6  -6   31.30    8.60
  -7   6   6   39.30    9.00
  -7   6   6   44.80    7.60
   6  -6  -6   25.60    7.40
  -6   6   6   19.30    6.40
  -6   6   6   17.30    6.30
   5  -6  -6   -0.30    3.70
  -5   6   6   -5.70    2.90
  -5   6   6   -1.10    3.30
   4  -6  -6   14.00    6.70
  -4   6   6   27.00    8.00
  -4   6   6   19.70    6.60
   3  -6  -6  388.96   22.10
  -3   6   6  387.16   22.30
   2  -6  -6  297.57   19.20
  -2   6   6  314.97   20.10
   1  -6  -6   47.10    9.60
   0  -6  -6   85.79   11.80
   0   6   6   82.49   12.50
  -1  -6  -6   -7.10    3.80
   1   6   6    0.10    4.40
  -2  -6  -6   23.80    7.20
   2   6   6   35.30    9.10
  -3  -6  -6  113.39   13.10
   3   6   6  100.19   14.60
   4   6   6    6.70    6.00
  -5  -6  -6   27.70    8.00
   5   6   6   48.40   11.10
   6   6   6   -8.50    5.90
   8  -7  -6  -12.40    4.00
   8  -7  -6   -6.20    5.70
  -8   7   6    6.70    4.70
  -8   7   6   -7.10    6.40
   7  -7  -6    0.40    5.10
  -7   7   6    6.00    4.80
  -7   7   6   -1.40    4.90
   6  -7  -6    7.20    6.30
  -6   7   6    9.30    5.90
  -6   7   6    6.30    4.00
   5  -7  -6   23.00    8.10
  -5   7   6   30.10    8.10
  -5   7   6   18.90    6.60
   4  -7  -6    2.00    5.30
  -4   7   6   15.40    6.40
  -4   7   6    9.20    5.20
   3  -7  -6   75.19   11.90
  -3   7   6   65.39   11.50
   2  -7  -6    6.90    5.60
  -2   7   6   15.40    5.50
   1  -7  -6  320.57   20.60
  -1   7   6  316.07   22.00
   0  -7  -6  147.99   14.10
   0   7   6  141.19   14.60
  -1  -7  -6   98.89   13.70
   1   7   6   92.69   14.10
  -2  -7  -6   51.89   10.00
   2   7   6   52.99   11.30
  -3  -7  -6   29.50    8.50
   3   7   6   40.10    9.90
  -4  -7  -6   -3.90    4.80
   4   7   6   -0.10    5.10
  -5  -7  -6   -0.90    5.40
   5   7   6    8.50    7.80
   7  -8  -6   91.59   16.80
   6  -8  -6   59.49   13.30
  -6   8   6   57.89   11.60
  -6   8   6   70.99   10.40
   5  -8  -6   36.10    9.30
  -5   8   6   51.59   10.30
  -5   8   6   71.69   13.10
   4  -8  -6   -2.00    4.60
  -4   8   6   13.00    6.20
  -4   8   6   16.00    7.20
   3  -8  -6   31.90    8.30
  -3   8   6   32.50    8.40
   2  -8  -6   -5.70    3.60
  -2   8   6    4.00    3.40
   1  -8  -6    8.80    4.60
  -1   8   6   10.80    7.10
   0  -8  -6   32.00    7.80
   0   8   6   46.80   10.30
  -1  -8  -6   -0.80    5.20
   1   8   6   -3.80    4.80
  -2  -8  -6  160.28   15.80
   2   8   6  195.28   19.10
  -3  -8  -6    0.10    4.70
   3   8   6    2.30    4.90
  -4  -8  -6   19.60    7.30
   4   8   6   23.80    9.60
   5  -9  -6   55.39   12.10
  -5   9   6   59.99   11.20
  -5   9   6   47.80   11.10
   4  -9  -6   20.40    8.50
  -4   9   6   36.30    9.90
  -3   9   6  111.39   15.90
   2  -9  -6   89.09   14.20
  -2   9   6   94.99   15.00
   1  -9  -6   22.90    7.80
  -1   9   6   34.20    8.40
   0  -9  -6   22.90    8.40
   0   9   6   30.40   11.30
  -1  -9  -6   21.20    8.40
   1   9   6    9.70    6.50
  -2  -9  -6   80.09   13.50
   2   9   6   55.39   12.60
   2 -10  -6   77.49   13.20
  -2  10   6   68.09   13.20
   1 -10  -6  172.08   16.70
  -1  10   6  212.58   20.20
   4  10  -7   -7.00    4.20
   3  10  -7  101.19   16.40
   2  10  -7   32.90   10.20
   1  10  -7    6.40    7.80
   1  10  -7    6.60    4.00
   0  10  -7    6.60    7.30
  -1  10  -7   -1.20    6.60
  -1  10  -7   31.60    6.00
  -2  10  -7   25.20    6.60
  -2  10  -7   16.70    9.10
   6   9  -7   45.80   12.60
   5   9  -7  142.99   20.30
   4   9  -7   -1.00    7.40
   3   9  -7   18.90    7.50
   2   9  -7    1.10    6.10
   1   9  -7   27.90    4.30
   1   9  -7   20.60    8.50
  -1  -9   7   27.60    5.50
   0   9  -7   16.60    4.60
   0   9  -7   21.40    8.60
   0  -9   7    8.40    5.90
  -1   9  -7   97.89    9.60
  -1   9  -7   78.19   13.20
  -2   9  -7   54.09    9.00
  -2   9  -7   30.70    9.00
  -3   9  -7    2.80    4.60
  -3   9  -7   -1.80    6.30
   7   8  -7  137.59   18.70
   5   8  -7    7.50    6.10
   4   8  -7   47.50   10.50
   3   8  -7   25.30    8.80
   2   8  -7   88.09   14.30
   1   8  -7  142.29    8.20
   1   8  -7  124.69   14.30
  -1  -8   7  135.59    8.80
   0   8  -7  100.89   14.10
   0   8  -7  107.99    8.60
   0  -8   7   75.19   10.60
  -1   8  -7   59.69    8.70
  -1   8  -7   66.99   11.30
  -2   8  -7  116.99   13.40
  -2   8  -7  112.19   10.80
  -3   8  -7    8.30    5.90
  -3   8  -7   16.20    8.10
  -4   8  -7  128.19   13.30
  -4   8  -7  130.99   13.70
  -5   8  -7   13.20    7.80
   8   7  -7  331.27   29.20
   7   7  -7   47.20   11.00
   6   7  -7  238.98   20.00
   5   7  -7   46.40   10.70
   4   7  -7   14.80    5.80
   3   7  -7   -5.60    4.10
   2   7  -7    1.10    1.20
   2   7  -7    4.20    4.40
  -2  -7   7    2.90    1.50
   1   7  -7   -2.40    1.80
   1   7  -7    7.20    5.80
  -1  -7   7    1.60    2.80
   0   7  -7   68.79   10.90
   0   7  -7   82.99    7.70
   0  -7   7   64.39    8.10
  -1   7  -7  165.98   14.90
  -1   7  -7  179.08   12.10
   1  -7   7  156.78   12.40
  -2   7  -7    7.40    4.80
  -3   7  -7   40.50    8.00
  -3   7  -7   34.60    8.20
  -4   7  -7  116.79   12.80
  -4   7  -7  119.19   12.70
  -5   7  -7    1.30    5.50
  -5   7  -7   -0.60    5.30
   9   6  -7  160.78   17.50
   8   6  -7   -5.70    5.50
   7   6  -7   12.20    6.40
   6   6  -7   95.49   13.90
   5   6  -7   10.20    6.20
   4   6  -7  307.27   21.00
   3   6  -7   86.69   12.40
   2   6  -7  499.05   13.90
  -2  -6   7  479.85   14.00
   1   6  -7  895.81   25.70
   1   6  -7  942.71   36.70
  -1  -6   7  883.71   25.90
   0   6  -7    7.30    3.40
   0   6  -7   17.20    6.50
   0  -6   7   14.90    4.40
  -1   6  -7  909.91   30.30
  -1   6  -7  866.91   34.50
   1  -6   7  845.62   30.00
  -2   6  -7   24.50    6.80
  -2   6  -7   17.50    5.10
  -3   6  -7   26.90    7.00
  -4   6  -7   12.90    5.40
  -4   6  -7   18.60    5.70
  -5   6  -7   15.40    5.70
  -5   6  -7   26.30    7.00
  -6   6  -7  -12.00    4.90
   9   5  -7   11.20    7.10
   8   5  -7   44.70    9.60
   7   5  -7   12.60    5.30
   6   5  -7  886.61   37.20
   5   5  -7  128.79   12.80
   4   5  -7   34.00    7.90
   3   5  -7    9.60    5.60
   2   5  -7  350.66   11.90
   2   5  -7  340.77   20.30
  -2  -5   7  371.16   12.20
   1   5  -7   66.79   10.10
   1   5  -7   72.29    6.30
  -1  -5   7   66.69    6.00
   0   5  -7   10.80    3.60
   0   5  -7    6.50    4.40
   0  -5   7   12.80    4.10
  -1   5  -7  911.51   30.10
  -1   5  -7  858.91   32.80
   1  -5   7  844.32   29.60
  -2   5  -7  398.46   20.50
  -2   5  -7  357.66   18.90
  -3   5  -7  192.18   14.50
  -3   5  -7  192.28   13.90
  -4   5  -7  257.57   15.80
  -4   5  -7  224.88   16.80
  -5   5  -7  110.19   13.60
  -5   5  -7  108.99   10.60
  -5   5  -7  112.49   12.90
  -6   5  -7   49.90    8.20
  -6   5  -7   53.69   10.90
  -7   5  -7   14.60    7.00
  10   4  -7   -9.50    4.40
   9   4  -7  168.58   15.40
   9   4  -7  158.68    9.00
  -9  -4   7  176.38    9.60
   8   4  -7   12.40    5.10
   8   4  -7   10.70    2.40
   7   4  -7   33.60    8.50
   7   4  -7   31.40    2.60
   7   4  -7   31.90    2.80
   6   4  -7  777.32   32.70
   5   4  -7 1027.80   38.60
   4   4  -7   20.00    5.80
   4   4  -7   12.90    1.20
   3   4  -7  839.32   20.30
   3   4  -7  804.82   31.90
   3   4  -7  798.72   20.40
   2   4  -7  791.02   22.20
   2   4  -7  801.12   31.40
  -2  -4   7  789.42   22.00
   1   4  -7  105.59   10.70
   1   4  -7  112.59    7.90
  -1  -4   7  119.19    7.90
   0   4  -7    0.90    2.50
   0   4  -7    2.10    2.50
   0  -4   7   -0.50    2.70
  -1   4  -7 1591.24   48.10
  -1   4  -7 1579.64   44.60
   1  -4   7 1562.44   44.60
  -2   4  -7   11.60    4.90
  -2   4  -7    4.00    3.70
  -3   4  -7    5.30    4.30
  -3   4  -7    4.40    4.60
  -3   4  -7    3.30    4.10
  -4   4  -7  395.76   19.70
  -4   4  -7  336.67   18.70
  -4   4  -7  395.86   22.20
  -5   4  -7   18.60    5.90
  -5   4  -7    9.90    4.90
  -5   4  -7   23.40    6.30
  -6   4  -7    1.50    3.80
  -6   4  -7   -0.50    3.90
  -6   4  -7   -6.90    6.20
  -7   4  -7    6.90    6.00
  -7   4  -7   12.70    7.80
  10   3  -7   48.00    9.50
  10   3  -7   34.60    6.80
 -10  -3   7   34.00    7.10
   9   3  -7   18.90    6.40
   9   3  -7   17.30    4.50
  -9  -3   7   18.10    4.90
   8   3  -7   30.20    7.60
   8   3  -7   22.00    4.70
   8   3  -7   29.30    5.20
  -8  -3   7   27.50    4.80
   7   3  -7  264.97   17.50
   7   3  -7  221.38   10.60
   7   3  -7  231.98   10.70
   6   3  -7    2.40    1.90
   6   3  -7    2.60    3.70
   6   3  -7    0.10    1.90
   5   3  -7   74.19    5.40
   5   3  -7   82.49    5.30
   5   3  -7   95.89   10.40
   4   3  -7   10.50    4.80
   4   3  -7    9.50    2.50
   4   3  -7    9.00    2.10
   3   3  -7  241.28   15.60
   3   3  -7  256.27   10.00
   3   3  -7  255.77   10.40
  -3  -3   7  244.58   10.00
   2   3  -7  297.57   12.50
   2   3  -7  330.07   18.40
  -2  -3   7  321.07   12.70
   1   3  -7  275.67   16.40
   1   3  -7  280.07   12.90
   1   3  -7  246.58   15.40
  -1  -3   7  275.17   12.50
  -1  -3   7  274.37   16.60
   0   3  -7  114.79   10.00
   0   3  -7  129.79    9.30
   0   3  -7   89.99    9.40
   0  -3   7  104.59    8.40
  -1   3  -7 1126.69   37.50
  -1   3  -7 1126.69   35.30
  -1   3  -7 1111.79   36.80
   1  -3   7 1150.68   35.50
  -2   3  -7   29.00    6.60
  -2   3  -7   38.90    7.60
  -2   3  -7   30.50    6.50
  -3   3  -7   56.99    8.50
  -3   3  -7   44.30    8.00
  -3   3  -7   57.49    9.30
  -4   3  -7   55.99    9.50
  -4   3  -7   60.09    9.00
  -4   3  -7   56.29    8.60
  -5   3  -7   39.00    9.10
  -5   3  -7   24.60    5.70
  -5   3  -7   23.70    7.30
  -6   3  -7   55.09    8.60
  -6   3  -7   64.69   12.60
  -6   3  -7   34.40    8.10
  -7   3  -7    5.00    4.70
  -7   3  -7    1.50    5.20
  10   2  -7    4.90    4.50
 -10  -2   7   -7.80    4.30
   9   2  -7    5.70    4.80
   9   2  -7   -3.20    3.70
   9   2  -7   -1.10    3.50
  -9  -2   7    3.90    4.10
   8   2  -7   15.40    5.00
   8   2  -7    7.80    3.70
   8   2  -7   12.60    4.70
  -8  -2   7    8.00    4.10
   7   2  -7  445.86   17.90
   7   2  -7  490.05   23.60
  -7  -2   7  509.25   21.90
   6   2  -7  546.45   18.90
   6   2  -7  502.65   18.20
   6   2  -7  528.65   24.20
   5   2  -7    9.50    3.20
   5   2  -7    6.60    2.40
   5   2  -7    7.80    4.20
   4   2  -7  880.91   25.50
   4   2  -7  874.41   35.70
   4   2  -7  908.21   25.20
   4   2  -7  940.11   33.70
  -4  -2   7  972.40   38.50
   3   2  -7  719.53   21.70
   3   2  -7  737.53   22.30
   3   2  -7  710.53   28.40
   3   2  -7  707.93   27.60
  -3  -2   7  744.43   29.10
  -3  -2   7  762.52   22.30
   2   2  -7  105.59   10.00
   2   2  -7   91.79    9.70
   2   2  -7   96.79    7.10
  -2  -2   7   94.39    7.10
  -2  -2   7   69.49    9.60
   1   2  -7   25.30    4.80
   1   2  -7   21.00    5.40
   1   2  -7   15.10    5.40
  -1  -2   7   29.70    5.10
   0   2  -7  169.68   12.30
   0   2  -7  181.68   11.40
   0   2  -7  170.78   12.90
   0  -2   7  179.68   11.20
  -1   2  -7   47.90    7.70
  -1   2  -7   54.39    7.90
  -1   2  -7   51.59    8.00
   1  -2   7   46.80    7.40
   1  -2   7   40.50    7.20
  -2   2  -7   58.99    8.70
  -2   2  -7   49.90    8.10
  -2   2  -7   72.89   10.10
   2  -2   7   57.19    8.20
  -3   2  -7 1278.77   42.40
  -3   2  -7 1253.17   40.40
  -3   2  -7 1254.47   40.50
   3  -2   7 1318.17   39.80
  -4   2  -7  191.48   13.70
  -4   2  -7  208.58   16.10
  -4   2  -7  183.18   13.50
   4  -2   7  186.08   13.30
  -5   2  -7   72.09   10.10
  -5   2  -7   92.59   10.30
  -5   2  -7  129.89   13.50
  -6   2  -7  119.89   11.40
  -6   2  -7  128.99   14.90
  -6   2  -7  122.99   12.70
  -7   2  -7   -1.70    4.90
  -7   2  -7    3.20    5.90
  10   1  -7   -0.30    4.40
 -10  -1   7    9.30    6.50
   9   1  -7  225.98   15.40
  -9  -1   7  223.28   14.70
   8   1  -7   -6.70    2.90
   8   1  -7   -4.50    2.70
   8   1  -7    2.50    3.60
  -8  -1   7    0.10    2.50
   7   1  -7   61.39    9.10
   7   1  -7   51.09    7.20
   7   1  -7   56.09    7.40
  -7  -1   7   45.90    7.00
   6   1  -7  561.24   21.10
   6   1  -7  549.05   24.00
   6   1  -7  510.95   26.00
   6   1  -7  521.25   19.90
  -6  -1   7  559.74   20.70
   5   1  -7  206.38   14.20
   5   1  -7  191.38   13.30
   5   1  -7  199.38   10.70
   5   1  -7  185.38   11.10
   4   1  -7  100.09    9.60
   4   1  -7   94.99    7.60
   4   1  -7  101.39    9.50
   4   1  -7   91.19    6.90
   3   1  -7    3.80    2.20
   3   1  -7    0.40    2.20
   3   1  -7    6.30    3.50
   3   1  -7    0.90    3.80
  -3  -1   7    3.10    2.10
   2   1  -7  194.68   13.30
   2   1  -7  183.78   10.30
   2   1  -7  194.18   13.70
   2   1  -7  192.68   10.80
  -2  -1   7  194.98   11.00
  -2  -1   7  186.68   12.70
   1   1  -7   86.99    9.50
   1   1  -7   87.99    7.90
   1   1  -7   94.09    9.00
  -1  -1   7   99.39    8.10
  -1  -1   7   88.79    8.70
   0   1  -7 2287.47   58.19
   0   1  -7 2234.28   60.99
   0   1  -7 2245.48   60.29
   0  -1   7 2285.27   60.09
   0  -1   7 2287.07   58.19
  -1   1  -7   37.40    6.80
  -1   1  -7   40.80    7.20
  -1   1  -7   40.60    7.50
   1  -1   7   48.20    7.50
   1  -1   7   38.40    6.80
  -2   1  -7   27.20    6.50
  -2   1  -7   29.40    6.90
  -2   1  -7   25.80    6.30
   2  -1   7   17.60    5.10
  -3   1  -7   26.30    6.50
  -3   1  -7   17.40    5.70
  -3   1  -7   35.60    7.20
   3  -1   7   12.10    4.90
  -4   1  -7  147.39   12.20
  -4   1  -7  161.68   13.90
  -4   1  -7  145.89   14.50
   4  -1   7  147.39   11.60
  -5   1  -7   41.10    8.20
  -5   1  -7   31.80    8.00
   5  -1   7   36.40    6.90
  -6   1  -7   15.10    5.80
  -6   1  -7   20.00    6.40
   6  -1   7   12.70    4.80
  -7   1  -7   -5.10    5.40
  -7   1  -7   -4.90    3.80
   7  -1   7    4.50    3.70
  10   0  -7   -6.60    3.80
 -10   0   7    7.40    5.00
   9   0  -7  106.99   10.50
   9   0  -7  108.19   10.20
  -9   0   7  118.29   11.40
   8   0  -7  102.69   10.20
   8   0  -7  119.89   11.00
   8   0  -7  119.19   11.20
  -8   0   7  107.79   10.30
   7   0  -7  122.09   11.00
   7   0  -7  103.89   10.10
   7   0  -7  136.89   12.50
   7   0  -7  120.59   11.00
  -7   0   7  144.79   11.00
   6   0  -7  145.49   11.90
   6   0  -7  167.88   12.10
   6   0  -7  162.68   11.10
   6   0  -7  160.08   12.20
  -6   0   7  189.98   12.10
   5   0  -7   -0.60    2.60
   5   0  -7    2.00    2.40
   5   0  -7    1.90    3.20
   5   0  -7    2.20    2.90
  -5   0   7   -0.90    2.50
   4   0  -7  563.84   24.10
   4   0  -7  537.55   22.90
   4   0  -7  531.55   20.00
   4   0  -7  563.74   21.10
  -4   0   7  534.75   22.50
   3   0  -7  236.38   12.20
   3   0  -7  225.88   14.40
   3   0  -7  209.78   11.90
   3   0  -7  198.88   13.30
  -3   0   7  197.78   11.50
  -3   0   7  211.18   13.50
   2   0  -7  120.89    9.10
   2   0  -7  100.39    9.60
   2   0  -7  117.09   10.70
   2   0  -7  109.09    8.40
  -2   0   7  119.39   10.30
  -2   0   7  112.89    8.80
   1   0  -7    8.30    3.40
   1   0  -7    1.90    3.70
   1   0  -7    5.90    3.70
  -1   0   7   12.80    4.90
  -1   0   7    7.10    3.60
   0   0  -7  624.84   25.70
   0   0  -7  599.54   25.50
   0   0  -7  643.24   24.20
   0   0   7  602.74   23.40
   0   0   7  651.73   25.60
  -1   0  -7  763.52   28.20
  -1   0  -7  735.53   28.70
   1   0   7  731.43   28.20
   1   0   7  759.82   27.90
  -2   0  -7  607.84   25.90
  -2   0  -7  593.94   25.50
   2   0   7  609.94   25.30
  -3   0  -7   21.80    7.00
   3   0   7   20.60    5.60
  -4   0  -7    5.00    4.20
   4   0   7   -1.40    3.00
  -5   0  -7   10.90    4.80
   5   0   7    6.80    4.60
  -6   0  -7  171.08   16.00
  -6   0  -7  185.78   14.20
   6   0   7  188.78   13.70
  -7   0  -7   64.39   12.00
  -7   0  -7   52.89    9.60
   7   0   7   44.00    7.60
  10  -1  -7    1.70    4.30
 -10   1   7   -0.50    4.70
   9  -1  -7  196.08   13.00
   9  -1  -7  190.88   13.00
  -9   1   7  170.08   14.30
   8  -1  -7   29.10    6.80
   8  -1  -7   19.30    5.60
   8  -1  -7   44.80    7.60
  -8   1   7   29.20    7.00
   7  -1  -7  287.67   16.90
   7  -1  -7  302.87   16.60
   7  -1  -7  282.47   16.40
  -7   1   7  293.07   16.80
   6  -1  -7    6.00    3.80
   6  -1  -7    1.60    3.50
   6  -1  -7    2.40    3.10
  -6   1   7    1.00    3.30
   5  -1  -7   53.89    8.40
   5  -1  -7   54.49    7.60
   5  -1  -7   64.29    8.80
   5  -1  -7   70.69    8.10
  -5   1   7   64.99    8.70
  -5   1   7   74.79    8.50
   4  -1  -7  307.17   17.10
   4  -1  -7  329.17   15.80
   4  -1  -7  330.77   16.30
   4  -1  -7  333.27   17.90
  -4   1   7  305.07   16.50
   3  -1  -7   -0.10    2.30
   3  -1  -7    1.50    3.40
   3  -1  -7   -1.00    3.40
   3  -1  -7   -0.30    2.30
  -3   1   7   -1.90    3.00
   2  -1  -7   40.70    6.70
   2  -1  -7   42.60    6.50
   2  -1  -7   50.69    7.90
  -2   1   7   46.70    7.30
  -2   1   7   48.50    7.70
   1  -1  -7 1030.00   35.20
   1  -1  -7  996.60   32.70
  -1   1   7  985.90   32.40
  -1   1   7 1016.70   34.40
   0  -1  -7    6.70    4.60
   0  -1  -7    7.10    4.10
   0   1   7    8.60    3.70
   0   1   7   -0.70    2.80
  -1  -1  -7   15.50    5.10
   1   1   7   15.20    5.30
  -2  -1  -7   27.40    6.70
   2   1   7   19.20    6.10
  -3  -1  -7   25.90    7.10
   3   1   7   34.50    7.30
  -4  -1  -7  678.23   31.10
   4   1   7  755.72   30.10
  -5  -1  -7    9.40    4.50
   5   1   7   18.50    6.00
  -6  -1  -7   14.20    5.70
   6   1   7    4.70    4.30
  -7  -1  -7   79.89   13.10
  10  -2  -7  -10.00    4.30
 -10   2   7   -7.40    4.50
   9  -2  -7   49.60    8.80
   9  -2  -7   29.10    6.40
  -9   2   7   48.00    9.80
   8  -2  -7    0.70    3.60
   8  -2  -7   -1.40    3.80
   8  -2  -7    3.20    4.30
  -8   2   7   -2.10    3.80
   7  -2  -7  216.68   14.50
   7  -2  -7  243.68   16.40
   7  -2  -7  252.07   14.90
  -7   2   7  247.38   16.10
   6  -2  -7  350.36   18.30
   6  -2  -7  310.87   18.10
   6  -2  -7  329.37   17.80
  -6   2   7  305.97   16.50
  -6   2   7  306.67   17.70
   5  -2  -7   91.19    9.90
   5  -2  -7   87.09    9.30
   5  -2  -7   90.49    9.30
  -5   2   7   98.69    9.50
  -5   2   7   76.69    8.40
   4  -2  -7   48.50    7.80
   4  -2  -7   67.39    9.10
   4  -2  -7   47.10    8.10
  -4   2   7   53.99    8.50
   3  -2  -7   21.90    5.80
   3  -2  -7   22.70    5.70
   3  -2  -7   24.40    5.10
  -3   2   7   19.00    5.70
   2  -2  -7  728.43   27.70
   2  -2  -7  766.42   29.80
   2  -2  -7  756.02   27.30
  -2   2   7  774.22   28.10
  -2   2   7  815.62   30.00
   1  -2  -7 1228.78   38.90
   1  -2  -7 1252.27   38.60
  -1   2   7 1308.17   41.20
  -1   2   7 1192.48   38.60
   0  -2  -7  142.69   11.70
   0   2   7  128.09   11.80
  -1  -2  -7  108.39   10.20
   1   2   7   80.29    9.10
  -2  -2  -7   10.10    4.40
   2   2   7   10.00    5.10
   3   2   7    4.20    4.70
  -4  -2  -7   11.20    6.50
   4   2   7    0.70    4.00
  -5  -2  -7    8.40    5.00
  -6  -2  -7  305.77   21.80
   6   2   7  253.17   17.90
  -7  -2  -7    5.70    6.00
   7   2   7   -1.30    5.10
   9  -3  -7   21.80    5.70
  -9   3   7   25.30    8.30
   8  -3  -7   98.19   10.10
   8  -3  -7   87.19    9.20
   8  -3  -7  106.29   13.90
  -8   3   7  103.99   13.90
   7  -3  -7   -6.40    3.20
   7  -3  -7   -3.40    3.60
   7  -3  -7    0.40    4.00
  -7   3   7    5.30    3.70
  -7   3   7    5.30    3.30
   6  -3  -7   73.79   10.00
   6  -3  -7   61.69    9.50
   6  -3  -7   55.29    9.80
  -6   3   7   59.39    8.70
  -6   3   7   41.70    7.90
   5  -3  -7  150.08   12.90
   5  -3  -7  140.79   12.00
   5  -3  -7  149.88   12.60
  -5   3   7  130.29   11.30
  -5   3   7  149.59   12.60
   4  -3  -7  138.69   12.20
  -4   3   7  157.28   12.10
   3  -3  -7  567.24   24.50
  -3   3   7  558.64   24.80
   2  -3  -7  339.67   18.30
  -2   3   7  315.57   18.10
   1  -3  -7  551.04   24.00
  -1   3   7  544.55   25.10
   0  -3  -7   49.00    8.30
   0   3   7   33.80    7.00
  -1  -3  -7    9.10    5.00
   1   3   7   10.90    5.30
  -2  -3  -7  113.39   11.40
   2   3   7  104.49   11.70
  -3  -3  -7  196.08   16.00
   3   3   7  195.28   16.10
  -4  -3  -7  938.71   38.20
   4   3   7  977.40   38.40
  -5  -3  -7  127.29   14.40
   5   3   7  106.99   14.20
  -6  -3  -7   28.70    8.80
   6   3   7   28.50    7.90
  -7  -3  -7   15.00    8.20
   7   3   7    4.30    4.80
   9  -4  -7    1.80    5.40
   9  -4  -7    8.10    4.60
  -9   4   7    1.80    5.00
   8  -4  -7   65.79   12.00
   8  -4  -7   68.59    9.80
   8  -4  -7   55.59    8.50
  -8   4   7   67.29   11.50
   7  -4  -7   41.30    7.50
   7  -4  -7   37.00    8.50
   7  -4  -7   35.60    8.70
  -7   4   7   51.09   10.30
  -7   4   7   43.80    7.70
   6  -4  -7  425.06   21.50
   6  -4  -7  467.15   24.50
  -6   4   7  433.06   20.80
  -6   4   7  437.36   23.60
   5  -4  -7  735.03   31.40
  -5   4   7  739.93   30.90
  -5   4   7  755.22   29.60
   4  -4  -7  307.57   18.80
  -4   4   7  270.67   17.20
  -4   4   7  272.97   17.40
   3  -4  -7   31.70    7.30
  -3   4   7   29.20    6.70
   2  -4  -7   34.20    7.50
  -2   4   7   34.10    7.60
   1  -4  -7    2.30    3.80
  -1   4   7   15.30    5.80
   0  -4  -7  126.09   12.30
   0   4   7  161.98   14.50
  -1  -4  -7   68.19   10.30
   1   4   7   45.70    9.70
  -2  -4  -7   71.49   10.80
   2   4   7   85.39   12.90
  -3  -4  -7  304.87   20.30
   3   4   7  313.17   20.70
  -4  -4  -7  100.69   14.20
   4   4   7  101.79   14.00
  -5  -4  -7   23.40    8.20
   5   4   7   31.50    8.30
   6   4   7   26.20    7.30
   9  -5  -7  117.99   16.50
   9  -5  -7  126.49   10.70
  -9   5   7  152.08   16.00
   8  -5  -7   -1.60    5.10
   8  -5  -7   -4.50    3.60
  -8   5   7   -0.80    4.40
  -8   5   7   -9.00    4.20
   7  -5  -7   -4.20    3.40
   7  -5  -7   -4.90    3.90
  -7   5   7    3.70    5.60
  -7   5   7   -3.10    3.50
   6  -5  -7  252.87   18.80
  -6   5   7  273.77   19.40
  -6   5   7  270.97   16.70
   5  -5  -7   85.29   12.20
  -5   5   7   62.89   10.70
  -5   5   7   83.09   11.10
   4  -5  -7   26.50    7.10
  -4   5   7   18.60    6.90
   3  -5  -7  241.38   17.30
  -3   5   7  234.58   17.20
   2  -5  -7  265.97   17.50
  -2   5   7  266.97   18.80
   1  -5  -7   -2.50    3.60
   0  -5  -7   21.70    6.20
   0   5   7   16.10    6.10
  -1  -5  -7  466.45   24.50
   1   5   7  433.76   25.40
  -2  -5  -7  174.28   15.40
   2   5   7  157.98   16.00
  -3  -5  -7   23.70    7.20
   3   5   7   53.19   10.80
  -4  -5  -7   -3.60    3.10
   4   5   7   -5.20    2.30
  -5  -5  -7    3.40    5.90
   5   5   7   11.20    6.50
  -6  -5  -7    7.50    6.40
   6   5   7   27.50    8.20
   8  -6  -7   -5.10    3.80
   8  -6  -7   -4.60    5.10
  -8   6   7   -9.90    4.50
  -8   6   7   -1.80    5.30
   7  -6  -7   61.39   11.90
  -7   6   7   47.40    8.50
  -7   6   7   41.70    9.20
   6  -6  -7    2.70    4.30
  -6   6   7   -2.40    4.30
  -6   6   7   10.10    6.10
   5  -6  -7   85.39   12.90
  -5   6   7   75.09   11.40
  -5   6   7   63.59   11.10
   4  -6  -7   68.39   11.70
  -4   6   7   63.49   12.80
   3  -6  -7   47.40   10.40
  -3   6   7   42.90    9.20
   2  -6  -7   81.89   12.60
  -2   6   7   97.59   13.90
   1  -6  -7   21.10    7.00
  -1   6   7   25.50    8.50
   0  -6  -7   41.20    9.10
   0   6   7   28.90    8.40
  -1  -6  -7   53.29   10.20
   1   6   7   41.40   10.00
  -2  -6  -7    5.60    5.80
   2   6   7    0.10    5.00
  -3  -6  -7   14.30    6.70
   3   6   7   -9.50    5.60
  -4  -6  -7  136.69   14.40
   4   6   7  127.69   18.00
  -5  -6  -7  230.68   19.70
   5   6   7  209.98   24.00
   7  -7  -7   -2.60    4.00
  -7   7   7   13.00    7.00
  -6   7   7   37.90    8.30
   5  -7  -7   34.60    9.00
  -5   7   7   23.30    6.90
  -5   7   7   37.70    9.60
   4  -7  -7  218.78   18.50
  -4   7   7  268.97   19.60
   3  -7  -7    1.70    5.10
  -3   7   7    3.20    4.10
   2  -7  -7   39.40    9.00
  -2   7   7   48.10   10.80
   1  -7  -7   86.79   13.00
  -1   7   7   74.29   13.10
   0  -7  -7   -7.60    3.90
   0   7   7    5.10    4.70
  -1  -7  -7    1.80    6.00
   1   7   7   21.80    8.60
  -2  -7  -7    0.80    5.20
   2   7   7   14.60    6.20
  -3  -7  -7   60.09   11.70
  -4  -7  -7    2.60    7.20
   4   7   7   -0.30    4.30
   6  -8  -7  176.98   18.50
  -6   8   7  167.98   16.30
  -6   8   7  194.68   18.60
   5  -8  -7  162.88   17.50
  -5   8   7  177.88   17.00
  -5   8   7  219.58   18.70
  -4   8   7   -5.70    4.70
   3  -8  -7  112.29   15.90
  -3   8   7  138.69   15.60
   2  -8  -7   10.40    6.20
  -2   8   7   18.60    8.20
   1  -8  -7    7.80    5.60
  -1   8   7   -6.50    3.20
   0  -8  -7   10.50    5.70
   0   8   7   -3.00    3.50
  -1  -8  -7   -0.40    5.40
   1   8   7   -0.70    6.00
  -2  -8  -7   45.50   10.50
   2   8   7   40.40   11.00
  -3  -8  -7   -7.50    5.80
   3   8   7   12.50    7.00
   4  -9  -7   23.90    8.40
  -4   9   7   55.09   11.80
   3  -9  -7   -0.10    7.00
  -3   9   7    9.80    8.20
   2  -9  -7   12.30    7.90
  -2   9   7   27.40    9.20
   1  -9  -7   17.80    8.40
  -1   9   7   26.80   10.20
   0  -9  -7   10.40    6.50
   0   9   7   20.20    8.70
  -1  -9  -7  260.97   21.30
   1   9   7  293.27   28.60
   2  10  -8   37.20   10.30
   1  10  -8    8.40    8.00
   0  10  -8  103.19    9.10
   0  10  -8  121.59   17.40
   5   9  -8   32.50   10.00
   4   9  -8  176.48   19.20
   3   9  -8   14.40    7.10
   2   9  -8    3.50    6.30
   1   9  -8    3.30    2.50
   1   9  -8    5.30    6.10
   0   9  -8   65.69   12.90
   0   9  -8   48.80    7.00
  -1   9  -8  109.29   10.00
  -1   9  -8  103.89   15.90
  -2   9  -8   -1.20    6.90
  -2   9  -8    3.30    4.50
   6   8  -8   12.10    7.80
   4   8  -8   69.69   14.30
   3   8  -8  404.66   26.40
   2   8  -8   31.30   10.20
  -2  -8   8   30.90    2.50
   1   8  -8  225.68   19.20
   1   8  -8  247.78   11.60
  -1  -8   8  270.27   12.80
   0   8  -8  177.88   11.40
   0   8  -8  186.48   17.60
   0  -8   8  168.98   12.70
  -1   8  -8   76.39    8.60
  -1   8  -8   46.30   10.30
  -2   8  -8   53.29    8.80
  -2   8  -8   51.49   11.00
  -3   8  -8   50.49    9.00
  -3   8  -8   49.20   10.20
  -4   8  -8   32.70    9.40
  -4   8  -8   44.40    9.20
   6   7  -8  122.79   17.10
   5   7  -8  163.28   17.20
   4   7  -8   70.99   13.20
   3   7  -8  280.07   21.40
   2   7  -8    6.00    5.40
   2   7  -8    9.70    1.90
  -2  -7   8    4.20    2.20
   1   7  -8   39.50    5.30
   1   7  -8   45.20   10.20
  -1  -7   8   35.40    5.70
   0   7  -8   66.79    7.60
   0   7  -8   80.59   12.70
   0  -7   8   88.39    9.10
  -1   7  -8    3.30    5.20
  -1   7  -8   16.00    4.50
  -2   7  -8    1.40    4.10
  -2   7  -8   14.20    4.80
  -3   7  -8   -4.80    5.10
  -3   7  -8   16.70    6.10
  -4   7  -8   35.90    8.90
  -4   7  -8   47.00    9.90
  -5   7  -8   -0.40    6.50
  -5   7  -8  -18.20    5.90
   8   6  -8   23.20    9.30
   7   6  -8  293.27   22.30
   6   6  -8    3.00    6.20
   5   6  -8   16.20    7.10
   4   6  -8   24.10    7.60
   3   6  -8  360.26   22.60
   2   6  -8   72.49    5.40
   2   6  -8   81.49   12.70
  -2  -6   8   78.39    6.30
   1   6  -8   83.49   12.20
   1   6  -8   79.59    6.90
  -1  -6   8   84.19    7.50
   0   6  -8    9.70    5.70
   0   6  -8   14.90    4.30
   0  -6   8   17.10    5.80
  -1   6  -8   41.10    9.20
  -1   6  -8   42.50    7.40
  -2   6  -8  170.38   13.40
  -3   6  -8   31.40    9.40
  -3   6  -8   27.20    7.30
  -4   6  -8   14.70    5.70
  -4   6  -8   14.60    6.70
  -5   6  -8   80.79   10.80
  -5   6  -8  104.99   14.30
   9   5  -8   -0.20    4.70
   8   5  -8   72.59   13.30
   7   5  -8   -5.40    4.10
   6   5  -8   39.70    9.40
   5   5  -8  104.19   13.90
   4   5  -8   -2.00    4.40
   3   5  -8   56.79    9.90
   3   5  -8   46.40    3.40
   3   5  -8   47.20    3.50
   2   5  -8   69.79    5.70
  -2  -5   8   64.69    5.50
   1   5  -8  403.96   16.20
   1   5  -8  401.76   22.60
  -1  -5   8  385.16   16.00
   0   5  -8    4.70    4.50
   0   5  -8    3.00    3.10
   0  -5   8    6.70    4.40
  -1   5  -8   32.80    6.30
  -1   5  -8   15.60    6.00
  -2   5  -8   25.90    7.50
  -2   5  -8   53.69    9.00
  -3   5  -8   48.00    8.70
  -3   5  -8   82.59   11.20
  -4   5  -8   -0.90    3.50
  -5   5  -8    6.70    4.50
  -5   5  -8   10.20    5.20
  -6   5  -8  100.09   14.60
  -6   5  -8  129.19   12.20
   9   4  -8   91.39   14.50
   8   4  -8    5.50    1.90
   8   4  -8   -0.40    1.80
   8   4  -8   -0.20    5.20
   7   4  -8  319.97   21.00
   7   4  -8  289.97    8.10
   6   4  -8  197.48   16.70
   5   4  -8   -0.10    4.10
   5   4  -8    0.80    0.90
   4   4  -8  387.06   22.80
   4   4  -8  390.36   11.70
   4   4  -8  392.36   11.90
   3   4  -8  140.29   13.30
   3   4  -8  129.59    7.30
   3   4  -8  119.19    6.80
  -3  -4   8  134.49    7.30
   2   4  -8  192.98   10.20
   2   4  -8  246.18   16.90
  -2  -4   8  203.28   10.40
   1   4  -8   18.20    6.20
  -1  -4   8   11.60    3.50
   0   4  -8   53.39    9.60
   0   4  -8   87.79    8.40
   0  -4   8   82.79    8.10
  -1   4  -8   58.09    9.80
  -1   4  -8   46.00    7.80
   1  -4   8   55.99    9.80
  -2   4  -8  269.37   16.50
  -2   4  -8  262.57   17.40
  -3   4  -8   42.80    8.60
  -3   4  -8   40.90    8.20
  -4   4  -8    6.00    4.40
  -4   4  -8   17.70    6.70
  -5   4  -8  154.38   15.50
  -5   4  -8  118.09   11.60
  -6   4  -8  267.07   16.90
  -6   4  -8  226.38   19.10
  10   3  -8  -10.50    4.90
  10   3  -8   -2.60    6.10
   9   3  -8  133.09    9.70
   9   3  -8  123.99   14.20
   8   3  -8    3.60    3.20
   8   3  -8    4.00    2.70
   8   3  -8    0.60    4.70
   7   3  -8    9.50    3.40
   7   3  -8   13.40    5.40
   7   3  -8   13.10    3.40
   6   3  -8   16.10    6.10
   6   3  -8   20.30    3.60
   6   3  -8   16.30    3.30
   5   3  -8  111.59   11.80
   5   3  -8   84.99    5.80
   5   3  -8   88.19    6.30
   4   3  -8  456.45   15.20
   4   3  -8  437.26   15.50
   4   3  -8  481.75   23.90
   3   3  -8   10.30    3.20
   3   3  -8    7.80    4.30
   3   3  -8    4.60    2.50
  -3  -3   8    0.20    2.30
   2   3  -8    3.10    3.90
   2   3  -8   -1.00    2.40
  -2  -3   8   -0.60    2.20
   1   3  -8   41.30    8.10
   1   3  -8   44.40    6.30
  -1  -3   8   38.50    6.10
   0   3  -8  195.48   14.40
   0   3  -8  184.98   12.20
   0  -3   8  207.98   13.10
  -1   3  -8   47.50    8.50
  -1   3  -8   33.00    6.80
  -2   3  -8  154.08   12.90
  -2   3  -8  171.88   13.10
  -3   3  -8   51.69    8.90
  -3   3  -8   35.60    7.60
  -4   3  -8  278.77   17.40
  -4   3  -8  280.87   19.20
  -5   3  -8  108.49   11.60
  -5   3  -8  125.79   13.90
  -6   3  -8    0.00    4.80
  -7   3  -8    4.90    6.50
  10   2  -8   76.79   11.50
  10   2  -8   87.19   10.70
 -10  -2   8   77.09   10.40
   9   2  -8  310.47   16.60
   9   2  -8  328.37   20.20
  -9  -2   8  324.67   16.50
   8   2  -8  157.98   17.30
   8   2  -8  177.78   11.20
   8   2  -8  153.88   10.90
  -8  -2   8  182.88   11.60
   7   2  -8    2.60    4.10
   7   2  -8    4.90    3.10
   7   2  -8    3.80    2.70
   6   2  -8  113.59    7.90
   6   2  -8  120.59   11.90
   6   2  -8   97.39    8.10
   5   2  -8  179.98    9.80
   5   2  -8  181.58   10.20
   5   2  -8  191.38   15.00
   4   2  -8  167.28   13.90
   4   2  -8  172.28   10.00
   4   2  -8  162.08    9.30
   3   2  -8  109.99    8.00
   3   2  -8  100.69    7.80
   3   2  -8  110.69   11.20
  -3  -2   8  116.79    8.30
   2   2  -8  162.98   13.30
   2   2  -8  167.78   10.80
  -2  -2   8  138.59    9.70
   1   2  -8   22.40    5.80
   1   2  -8   32.60    6.20
  -1  -2   8   27.50    5.30
   0   2  -8  205.38   14.80
   0   2  -8  185.88   12.40
   0  -2   8  212.48   13.10
  -1   2  -8    4.40    3.20
  -1   2  -8   12.80    4.80
   1  -2   8   16.40    5.30
  -2   2  -8    6.00    4.20
  -2   2  -8   14.90    5.30
   2  -2   8    3.00    3.70
  -3   2  -8  354.66   20.10
  -3   2  -8  377.76   21.70
   3  -2   8  394.96   20.10
  -4   2  -8  504.75   26.40
  -4   2  -8  480.45   23.80
   4  -2   8  486.75   22.70
  -5   2  -8   55.09   10.70
  -5   2  -8   38.70    8.00
  -6   2  -8    0.70    4.40
  -6   2  -8  -11.00    4.70
  -7   2  -8  139.49   16.10
  -7   2  -8  115.49   13.00
  10   1  -8  299.07   18.60
  10   1  -8  299.87   18.70
 -10  -1   8  311.97   18.50
   9   1  -8    4.00    4.20
   9   1  -8   11.40    5.40
  -9  -1   8    6.60    4.30
   8   1  -8  126.89   12.20
   8   1  -8  134.69   11.20
  -8  -1   8  141.89   11.00
   7   1  -8   11.00    4.80
   7   1  -8   10.20    5.10
   7   1  -8   11.70    4.40
  -7  -1   8   20.70    5.10
   6   1  -8    1.20    2.80
   6   1  -8   -1.50    3.40
   5   1  -8 1372.06   44.70
   5   1  -8 1349.36   38.20
   5   1  -8 1331.07   37.40
   4   1  -8   66.89    6.80
   4   1  -8   86.69   11.20
   4   1  -8   62.79    7.20
   3   1  -8   89.59    7.80
   3   1  -8  106.69   10.50
   3   1  -8  105.59    8.80
  -3  -1   8  102.69    8.30
   2   1  -8  669.63   23.50
   2   1  -8  663.73   24.00
   2   1  -8  646.94   27.80
  -2  -1   8  676.23   27.20
  -2  -1   8  633.74   23.40
   1   1  -8    5.70    3.30
   1   1  -8    8.20    4.60
  -1  -1   8    6.00    3.50
  -1  -1   8    7.00    3.80
   0   1  -8  145.59   12.70
   0   1  -8  138.89   11.30
   0  -1   8  153.98   11.50
   0  -1   8  126.99   11.60
  -1   1  -8 1741.63   53.59
  -1   1  -8 1923.81   53.19
   1  -1   8 1760.22   52.39
  -2   1  -8  102.29   10.60
  -2   1  -8   81.09   11.00
   2  -1   8   83.39   10.90
  -3   1  -8   19.70    6.00
  -3   1  -8    4.40    4.40
   3  -1   8    9.40    4.70
  -4   1  -8   12.60    5.50
  -4   1  -8   19.80    7.10
   4  -1   8   22.00    6.10
  -5   1  -8  172.58   15.90
  -5   1  -8  159.88   13.80
   5  -1   8  158.58   13.40
  -6   1  -8   -1.00    4.70
  -6   1  -8    6.20    5.90
   6  -1   8   -3.00    3.50
  -7   1  -8  165.88   17.70
  -7   1  -8  141.49   13.60
   7  -1   8  138.49   12.70
  10   0  -8  318.77   20.20
  10   0  -8  336.97   18.90
 -10   0   8  371.96   20.90
   9   0  -8  214.98   15.40
   9   0  -8  190.58   14.80
  -9   0   8  221.28   15.90
   8   0  -8   26.10    7.10
   8   0  -8   32.70    7.30
  -8   0   8   26.20    6.80
   7   0  -8   26.30    6.20
   7   0  -8   15.70    5.90
  -7   0   8   20.80    5.50
   6   0  -8    9.00    4.20
   6   0  -8    2.90    3.70
   6   0  -8    6.20    3.90
   5   0  -8  436.06   18.70
   5   0  -8  427.56   19.30
   5   0  -8  401.16   21.20
   4   0  -8  516.75   24.30
   4   0  -8  504.05   20.30
   4   0  -8  503.85   20.80
  -4   0   8  490.05   22.80
   3   0  -8   55.59    6.40
   3   0  -8   46.00    8.30
   3   0  -8   49.60    7.50
  -3   0   8   50.39    7.20
  -3   0   8   46.00    7.80
   2   0  -8   14.40    4.40
   2   0  -8   12.90    4.10
   2   0  -8    9.10    4.20
  -2   0   8   15.70    5.20
  -2   0   8   16.20    4.50
   1   0  -8  145.99   11.10
   1   0  -8  111.69   11.60
  -1   0   8  136.39   11.60
  -1   0   8  122.39   10.20
   0   0  -8   83.09   11.30
   0   0  -8  104.49   10.20
   0   0   8   83.19    9.20
  -1   0  -8    4.60    3.30
  -1   0  -8   -1.60    3.80
   1   0   8    2.20    3.90
  -2   0  -8 1853.61   55.89
  -2   0  -8 1817.22   54.79
   2   0   8 1813.22   54.19
  -3   0  -8  216.48   16.20
  -3   0  -8  252.27   17.60
   3   0   8  231.98   16.30
  -4   0  -8  143.09   13.90
  -4   0  -8  151.08   13.70
   4   0   8  152.78   13.10
  -5   0  -8  215.78   16.80
  -5   0  -8  196.18   17.60
   5   0   8  194.08   14.70
  -6   0  -8   11.40    7.70
  -6   0  -8   28.80   10.10
  -7   0  -8   65.99   12.40
  -7   0  -8   85.89   12.60
  10  -1  -8   52.59    9.90
  10  -1  -8   49.90    8.40
 -10   1   8   38.50    9.90
   9  -1  -8    7.50    5.70
   9  -1  -8   11.70    5.40
  -9   1   8   10.20    5.80
   8  -1  -8  500.65   23.30
   8  -1  -8  476.45   24.50
  -8   1   8  462.65   23.70
   7  -1  -8  107.19   11.00
   7  -1  -8  108.99   11.20
  -7   1   8   94.39   10.10
   6  -1  -8  308.87   18.20
   6  -1  -8  305.47   17.40
  -6   1   8  285.27   16.80
   5  -1  -8   36.50    6.70
   5  -1  -8   36.30    7.60
  -5   1   8   33.10    7.20
   4  -1  -8    1.10    3.20
   4  -1  -8    4.60    4.00
   4  -1  -8    1.70    2.90
  -4   1   8    7.80    4.70
   3  -1  -8   40.60    7.30
   3  -1  -8   32.00    6.00
   3  -1  -8   50.69    9.00
  -3   1   8   34.90    7.10
  -3   1   8   32.60    6.80
   2  -1  -8   97.89    9.20
   2  -1  -8  108.99   10.00
   2  -1  -8   90.39   10.10
  -2   1   8   81.69    8.80
  -2   1   8   75.79   10.30
   1  -1  -8   13.30    5.10
  -1   1   8    8.90    4.40
   0  -1  -8 2303.27   62.39
   0   1   8 2253.37   63.69
  -1  -1  -8   43.90    8.20
   1   1   8   46.20    8.50
  -2  -1  -8    1.40    4.80
   2   1   8    0.10    3.90
  -3  -1  -8  399.86   22.70
   3   1   8  422.16   22.80
  -4  -1  -8   11.10    6.00
  -5  -1  -8   11.70    5.80
   5   1   8    9.90    4.90
   6   1   8   51.49    8.80
   7   1   8  132.49   13.20
  10  -2  -8   73.29   12.30
 -10   2   8   76.59   12.60
   9  -2  -8    3.90    3.60
   9  -2  -8   -5.70    3.80
  -9   2   8    2.00    5.10
   8  -2  -8  313.47   18.00
   8  -2  -8  346.97   20.80
  -8   2   8  267.27   18.20
   7  -2  -8   10.20    5.50
   7  -2  -8   15.40    6.00
  -7   2   8   21.20    6.20
   6  -2  -8  600.74   27.10
   6  -2  -8  665.43   28.30
  -6   2   8  635.94   26.40
  -6   2   8  653.03   27.60
   5  -2  -8   53.99    9.20
   5  -2  -8   53.09    9.00
  -5   2   8   73.59   10.20
   4  -2  -8  546.25   24.50
   4  -2  -8  587.34   26.80
  -4   2   8  577.14   25.40
   3  -2  -8   60.09    9.20
  -3   2   8   64.79    9.90
   2  -2  -8   15.40    5.30
  -2   2   8   16.10    5.20
   1  -2  -8 1246.78   40.10
  -1   2   8 1103.79   40.10
   0  -2  -8   79.59    9.20
   0   2   8  103.99   11.50
  -1  -2  -8 2393.86   67.39
   1   2   8 2450.75   68.89
  -2  -2  -8   26.20    7.00
   2   2   8   16.70    6.50
  -3  -2  -8    1.80    3.70
   3   2   8    4.70    5.10
  -4  -2  -8    4.00    4.10
   4   2   8    6.70    5.10
  -5  -2  -8   33.70    9.80
   5   2   8   39.30    9.20
  -6  -2  -8   40.40   10.30
   6   2   8   50.09    9.90
   9  -3  -8   -9.90    3.10
   9  -3  -8    3.40    4.70
  -9   3   8   -5.80    5.10
   8  -3  -8   14.00    5.70
   8  -3  -8   22.00    6.40
  -8   3   8   31.00    7.80
   7  -3  -8   11.10    5.80
   7  -3  -8   15.60    5.80
  -7   3   8   15.20    6.50
  -7   3   8   14.00    4.70
   6  -3  -8  124.89   12.00
   6  -3  -8  109.39   12.20
  -6   3   8  116.19   11.00
  -6   3   8  108.99   11.10
   5  -3  -8  218.38   16.00
  -5   3   8  223.38   15.40
   4  -3  -8   14.20    5.70
  -4   3   8   21.80    6.70
   3  -3  -8  101.09   10.80
  -3   3   8   82.59   11.50
   2  -3  -8    7.00    4.80
  -2   3   8    4.40    3.60
   1  -3  -8   25.40    6.80
  -1   3   8   26.70    7.50
   0  -3  -8  144.79   13.20
   0   3   8  173.38   14.40
  -1  -3  -8  441.66   23.30
   1   3   8  428.56   24.20
  -2  -3  -8  819.02   34.90
   2   3   8  877.91   36.10
  -3  -3  -8   53.89   10.60
   3   3   8   65.49   11.00
  -4  -3  -8   32.80    8.50
   4   3   8   21.60    7.40
  -5  -3  -8    3.10    5.00
   5   3   8   -6.50    3.60
  -6  -3  -8   10.70    8.10
   6   3   8   13.30    7.30
   9  -4  -8   57.99    8.40
   9  -4  -8   45.30   12.10
  -9   4   8   53.29   11.80
   8  -4  -8    0.30    3.80
   8  -4  -8    0.90    5.10
  -8   4   8    7.80    4.30
   7  -4  -8   52.39    9.10
   7  -4  -8   53.09   10.80
  -7   4   8   56.79   10.60
  -7   4   8   48.40    9.00
   6  -4  -8  188.68   15.20
   6  -4  -8  215.68   17.20
  -6   4   8  188.38   15.40
  -6   4   8  215.18   15.50
   5  -4  -8  169.48   14.50
  -5   4   8  210.38   15.70
   4  -4  -8  263.47   17.70
  -4   4   8  243.68   17.50
   3  -4  -8   49.90    9.60
  -3   4   8   44.30    8.90
   2  -4  -8  250.17   17.30
   1  -4  -8   20.90    6.80
  -1   4   8   16.00    5.70
   0  -4  -8  254.27   17.50
   0   4   8  271.37   19.20
  -1  -4  -8  648.04   30.20
   1   4   8  658.93   31.30
  -2  -4  -8  404.96   23.90
   2   4   8  424.16   25.10
  -3  -4  -8   13.20    6.20
   3   4   8    5.40    5.40
  -4  -4  -8    0.70    5.70
   4   4   8    2.30    4.90
  -5  -4  -8  -10.80    5.10
   5   4   8    4.10    6.00
  -6  -4  -8   43.40   10.90
   6   4   8   56.39   10.50
   8  -5  -8    0.70    4.10
   8  -5  -8    2.50    6.50
  -8   5   8   -5.40    4.50
  -8   5   8   -3.20    4.30
   7  -5  -8   -1.40    4.40
   7  -5  -8    9.40    4.90
  -7   5   8   11.20    5.30
  -7   5   8   10.90    5.20
   6  -5  -8   15.90    6.60
  -6   5   8    7.00    5.10
  -6   5   8   16.00    7.10
   5  -5  -8   77.79   12.30
  -5   5   8   70.29   13.50
  -4   5   8   -6.90    3.60
   3  -5  -8   55.49    9.80
  -3   5   8   62.09   10.50
   2  -5  -8  312.77   20.20
  -2   5   8  304.37   21.00
   1  -5  -8  140.09   13.80
  -1   5   8  132.69   14.20
   0  -5  -8  179.38   15.70
   0   5   8  151.18   15.10
  -1  -5  -8   84.09   12.70
   1   5   8   95.49   14.00
  -2  -5  -8    6.50    4.80
   2   5   8   14.30    5.70
  -3  -5  -8   -2.30    3.80
   3   5   8   -3.10    4.70
  -4  -5  -8   -0.70    4.30
   4   5   8    4.30    6.30
  -5  -5  -8   20.00    8.20
   8  -6  -8   55.39   11.80
  -8   6   8   54.19   10.60
   7  -6  -8   65.59   11.10
   7  -6  -8   94.49   15.20
  -7   6   8   88.09   13.90
  -7   6   8   87.89   12.10
   6  -6  -8   52.79   10.80
  -6   6   8   80.49   13.70
  -6   6   8   38.60    9.90
   5  -6  -8  471.35   27.50
  -5   6   8  473.55   25.70
   4  -6  -8    0.30    5.40
  -4   6   8   12.90    5.20
   3  -6  -8   -0.50    4.50
  -3   6   8   25.60    8.20
   2  -6  -8   -2.00    4.30
  -2   6   8   12.00    6.80
   1  -6  -8   26.30    8.10
  -1   6   8   31.00    9.20
   0  -6  -8   19.60    6.20
   0   6   8   22.60    7.90
  -1  -6  -8    7.10    4.30
   1   6   8    5.60    6.60
  -2  -6  -8   74.89   12.40
   2   6   8   90.99   14.60
  -3  -6  -8    3.30    4.00
   3   6   8    3.30    6.20
  -4  -6  -8   35.10    9.70
   4   6   8   13.30    7.90
  -7   7   8   73.39   11.30
   6  -7  -8  143.09   15.90
  -6   7   8  157.68   16.80
  -6   7   8  158.48   15.50
   5  -7  -8   26.90   11.50
  -5   7   8   42.30    9.40
   4  -7  -8   12.90    5.50
  -4   7   8    5.40    5.90
   3  -7  -8  348.37   23.50
  -3   7   8  366.26   24.30
   2  -7  -8   -6.10    4.00
  -2   7   8    0.90    5.70
  -1   7   8   10.90    7.70
   0  -7  -8   42.90   10.30
   0   7   8   33.30   10.10
  -1  -7  -8   52.09   10.50
   1   7   8   41.10   11.60
   2   7   8   23.30    8.30
  -3  -7  -8    5.40    6.70
   3   7   8   12.00    6.50
   5  -8  -8   60.79   12.60
  -5   8   8  112.39   14.80
   4  -8  -8    2.50    5.20
  -4   8   8   12.80    7.30
   3  -8  -8   -3.40    4.60
  -3   8   8    6.90    6.60
   2  -8  -8   41.90   10.90
  -2   8   8   66.19   13.60
   1  -8  -8   14.80    7.60
  -1   8   8    3.20    7.90
   0  -8  -8   91.09   14.10
   0   8   8  101.99   16.70
  -1  -8  -8   -0.70    5.30
   1   8   8   -2.50    4.10
   4   9  -9   -2.10    5.00
   3   9  -9  106.89   17.00
   2   9  -9    6.40    6.40
   1   9  -9   -7.10    6.20
   1   9  -9    4.80    4.10
   0   9  -9   30.40   10.30
   0   9  -9   46.10    7.00
  -1   9  -9    7.00    4.30
   6   8  -9  105.59   16.10
   5   8  -9    0.90    5.60
   4   8  -9   86.99   15.60
   3   8  -9    7.80    7.20
   2   8  -9   62.29    3.80
   2   8  -9   61.39   12.50
   1   8  -9   43.70   11.40
   0   8  -9   -5.50    6.90
   0   8  -9    7.30    3.90
  -1   8  -9   -5.10    3.50
  -1   8  -9   -5.30    5.10
  -2   8  -9    4.20    4.30
  -2   8  -9   -1.50    5.50
  -3   8  -9   54.79   10.40
  -3   8  -9   59.19   11.20
   7   7  -9  169.58   17.60
   6   7  -9   33.20   11.90
   5   7  -9    2.60    6.30
   4   7  -9   10.20    6.70
   3   7  -9   43.90   10.40
   2   7  -9   43.00   10.10
   2   7  -9   55.29    4.70
  -2  -7   9   44.30    5.80
   1   7  -9   -3.40    2.70
   1   7  -9   -8.20    4.40
  -1  -7   9   -4.90    3.30
   0   7  -9   38.70    9.20
   0   7  -9   36.90    6.40
   0  -7   9   26.40    7.00
  -1   7  -9  224.78   14.70
  -1   7  -9  182.98   16.90
  -2   7  -9    1.60    3.80
  -2   7  -9   13.90    6.00
  -3   7  -9   10.40    7.40
  -3   7  -9   16.40    6.30
  -4   7  -9   -2.50    5.40
  -4   7  -9    7.90    6.00
   8   6  -9  108.39   16.00
   7   6  -9   12.60    7.00
   6   6  -9   27.30    8.70
   5   6  -9   32.30    9.10
   4   6  -9   29.20    8.50
   3   6  -9  181.58   16.70
   3   6  -9  197.88    6.40
   3   6  -9  189.38    6.90
   2   6  -9  179.48    9.40
   2   6  -9  202.28   17.50
  -2  -6   9  186.58    9.80
   1   6  -9    5.10    3.30
   1   6  -9    2.80    5.00
  -1  -6   9   -3.40    3.10
   0   6  -9  365.06   22.80
   0   6  -9  329.17   16.80
   0  -6   9  346.47   17.40
  -1   6  -9   25.10    7.70
  -1   6  -9   35.60    7.00
  -2   6  -9  290.47   18.20
  -2   6  -9  300.57   20.30
  -3   6  -9    1.90    4.00
  -3   6  -9    3.70    4.90
  -4   6  -9   20.40    6.80
  -4   6  -9   23.80    7.00
  -5   6  -9   46.30   10.60
  -5   6  -9   43.30   10.10
   8   5  -9   21.00    8.50
   7   5  -9   16.10    7.70
   6   5  -9  330.37   23.20
   5   5  -9   -0.10    3.30
   4   5  -9  266.87    7.00
   4   5  -9  261.67   20.10
   3   5  -9   41.30    4.20
   3   5  -9   34.50    8.60
   3   5  -9   47.10    4.50
  -3  -5   9   31.60    4.40
   2   5  -9  106.19    7.70
   2   5  -9   88.99   13.00
  -2  -5   9   81.89    7.20
   1   5  -9  202.28   12.00
   1   5  -9  197.58   16.20
  -1  -5   9  200.18   12.10
   0   5  -9  310.57   20.10
   0   5  -9  322.47   16.70
   0  -5   9  281.07   16.20
  -1   5  -9  515.95   23.50
  -1   5  -9  544.35   27.30
  -2   5  -9   64.59   11.20
  -2   5  -9   70.09   11.50
  -3   5  -9   20.50    7.40
  -3   5  -9   31.10    8.00
  -4   5  -9    4.90    4.90
  -4   5  -9    9.30    5.70
  -5   5  -9  296.07   21.90
  -5   5  -9  368.16   21.20
   9   4  -9   97.09   15.60
   8   4  -9    3.50    5.70
   7   4  -9  100.49   13.80
   7   4  -9  123.89    6.40
   6   4  -9   30.60    2.80
   6   4  -9   36.00    2.90
   6   4  -9   21.50    7.60
   5   4  -9   90.79   13.30
   5   4  -9   63.39    4.70
   5   4  -9   85.89    4.80
   4   4  -9   14.70    3.20
   4   4  -9    7.90    5.10
   4   4  -9   16.90    3.00
   3   4  -9   85.49   12.40
   3   4  -9  120.39    7.60
   3   4  -9  124.19    8.00
  -3  -4   9  105.09    7.60
   2   4  -9   -0.70    2.50
  -2  -4   9   -3.00    2.70
   1   4  -9  363.16   16.80
   1   4  -9  279.97   19.50
   0   4  -9  186.58   18.40
   0   4  -9  182.78   13.00
   0  -4   9  167.98   12.30
  -1   4  -9   14.70    5.20
  -2   4  -9    9.90    6.00
  -3   4  -9   37.00    8.30
  -3   4  -9   29.50    9.10
  -4   4  -9   37.20    9.00
  -4   4  -9   21.30    8.20
  -5   4  -9   13.50    7.20
  -5   4  -9   15.30    7.30
   9   3  -9  142.89   10.00
   9   3  -9  155.78   15.70
   8   3  -9   11.70    5.80
   8   3  -9    4.30    3.40
   8   3  -9    3.60    4.10
   7   3  -9    1.30    2.40
   7   3  -9   -1.90    4.00
   7   3  -9    2.00    2.70
   6   3  -9   -1.50    2.70
   6   3  -9    2.60    2.50
   6   3  -9   -3.60    2.10
   5   3  -9  160.78   14.90
   5   3  -9  148.79    9.00
   5   3  -9  151.68    8.50
   4   3  -9    8.20    3.40
   4   3  -9   12.60    3.50
   4   3  -9   11.80    5.90
   3   3  -9  497.75   18.50
   3   3  -9  505.65   19.40
  -3  -3   9  525.85   19.20
   2   3  -9  228.18   17.50
   2   3  -9  233.18   13.10
  -2  -3   9  220.78   12.40
   1   3  -9  176.68   15.10
   1   3  -9  186.48   12.50
  -1  -3   9  167.48   11.70
   0   3  -9   80.59    8.80
   0   3  -9   71.19   11.00
  -1   3  -9   85.09   10.90
  -1   3  -9   72.89   11.30
  -2   3  -9   55.79   10.10
  -3   3  -9   49.50    9.50
  -3   3  -9   55.69   11.40
  -4   3  -9  208.68   17.40
  -5   3  -9   -7.30    4.70
  -5   3  -9   -5.70    3.50
  -6   3  -9   -0.40    6.20
  -6   3  -9    4.10    6.40
   9   2  -9   -0.10    3.90
   9   2  -9    2.20    3.20
   8   2  -9    8.90    4.00
   8   2  -9   16.90    4.80
   8   2  -9   10.50    5.50
   7   2  -9   11.20    5.60
   7   2  -9   24.80    5.10
   6   2  -9  236.78   17.40
   6   2  -9  236.08   12.70
   6   2  -9  221.68   12.10
   5   2  -9   83.29    7.80
   5   2  -9   78.79    7.10
   4   2  -9  101.59    8.50
   4   2  -9  108.79   12.20
   4   2  -9  103.49    8.10
   3   2  -9   24.70    5.20
   3   2  -9   22.60    7.30
   3   2  -9   25.40    5.20
  -3  -2   9   25.20    5.30
   2   2  -9  803.12   33.20
   2   2  -9  806.82   27.90
  -2  -2   9  776.52   27.20
   1   2  -9   57.19    8.50
   1   2  -9   48.90    8.90
  -1  -2   9   54.89    8.10
   0   2  -9   -0.90    3.70
   0   2  -9    5.00    4.20
  -1   2  -9   -1.00    3.70
  -1   2  -9    4.40    4.50
   1  -2   9    7.10    4.80
  -2   2  -9    4.90    5.10
  -2   2  -9    1.60    3.80
   2  -2   9    4.70    4.60
  -3   2  -9   10.40    5.00
  -3   2  -9   -5.80    3.80
   3  -2   9   10.10    4.80
  -4   2  -9    1.20    4.10
  -5   2  -9  131.49   13.60
  -5   2  -9  127.99   14.60
  -6   2  -9   19.00    8.70
  -6   2  -9    2.50    5.70
   9   1  -9   11.70    5.70
   9   1  -9   14.70    5.90
  -9  -1   9   12.50    5.90
   8   1  -9    4.30    4.70
   8   1  -9   -0.90    3.30
   7   1  -9   13.60    5.10
   7   1  -9   26.10    5.70
   7   1  -9   20.10    6.20
   6   1  -9  142.99   14.00
   6   1  -9  139.19   10.80
   6   1  -9  148.59   10.30
   5   1  -9   45.30    8.80
   5   1  -9   37.30    6.20
   5   1  -9   31.80    6.40
   4   1  -9  235.18   16.70
   4   1  -9  235.48   13.80
   4   1  -9  221.58   12.70
   3   1  -9 1134.09   35.20
   3   1  -9 1209.68   42.60
   3   1  -9 1175.88   36.20
  -3  -1   9 1158.68   35.80
   2   1  -9    2.30    3.90
   2   1  -9    4.70    3.90
   2   1  -9    3.40    3.20
  -2  -1   9    5.10    4.80
  -2  -1   9    1.80    3.50
   1   1  -9   24.70    6.50
   1   1  -9   26.50    5.90
  -1  -1   9   24.60    6.50
   0   1  -9   48.10    8.30
   0   1  -9   42.80    9.00
   0  -1   9   42.80    8.20
  -1   1  -9  405.96   22.70
  -1   1  -9  382.46   21.20
   1  -1   9  406.16   21.80
  -2   1  -9  345.27   20.80
  -2   1  -9  327.87   20.10
   2  -1   9  326.77   19.70
  -3   1  -9   47.20    9.60
  -4   1  -9   15.50    6.60
  -4   1  -9    2.10    5.30
   4  -1   9   -1.10    4.40
  -5   1  -9  177.18   16.10
  -5   1  -9  157.18   16.10
   5  -1   9  174.18   14.20
  -6   1  -9   10.20    6.10
  -6   1  -9   -0.80    6.50
   6  -1   9    1.80    4.20
   9   0  -9   10.90    4.50
   9   0  -9   -0.50    3.60
  -9   0   9    5.60    5.00
   8   0  -9   31.00    7.50
  -8   0   9   29.10    7.30
   7   0  -9   -7.20    2.90
   7   0  -9   -4.30    2.90
   6   0  -9    0.30    4.00
   6   0  -9    1.80    3.50
   5   0  -9  341.07   20.80
   5   0  -9  340.37   17.70
   4   0  -9   24.00    5.30
   4   0  -9   13.10    6.20
   4   0  -9   19.00    5.40
  -4   0   9   19.30    5.60
   3   0  -9  939.51   32.00
   3   0  -9  918.21   36.10
   3   0  -9  910.31   34.50
  -3   0   9  880.81   34.10
  -3   0   9  853.91   34.30
   2   0  -9    8.20    5.20
   2   0  -9   15.00    5.00
   1   0  -9  184.28   15.50
   1   0  -9  193.68   13.60
  -1   0   9  175.98   14.10
   0   0  -9  477.95   24.90
   0   0  -9  477.85   23.20
   0   0   9  450.05   23.60
  -1   0  -9   11.20    4.80
  -1   0  -9    5.40    4.30
   1   0   9   14.10    6.00
  -2   0  -9    0.60    4.40
  -3   0  -9   49.80   10.00
  -3   0  -9   41.00    8.80
   3   0   9   41.90    8.80
  -4   0  -9  142.19   15.40
  -4   0  -9  177.08   16.00
   4   0   9  186.88   15.00
  -5   0  -9   -1.60    5.20
  -5   0  -9    1.90    5.60
   5   0   9   -6.20    3.60
  -6   0  -9   11.90    7.30
   6   0   9   -2.70    3.50
   9  -1  -9   52.39    9.80
   9  -1  -9   60.79    9.90
  -9   1   9   78.49   11.20
   8  -1  -9   90.89   12.60
   8  -1  -9   54.09    9.70
  -8   1   9   84.39   12.00
   7  -1  -9  178.08   14.30
   7  -1  -9  192.58   15.10
  -7   1   9  174.58   14.40
   6  -1  -9   89.09   10.30
   6  -1  -9   77.59   11.20
   5  -1  -9   18.00    5.40
   5  -1  -9   20.70    7.00
  -5   1   9   10.40    4.90
   4  -1  -9  141.09   12.00
   4  -1  -9  172.08   14.50
  -4   1   9  144.39   12.70
   3  -1  -9 1141.99   42.30
   3  -1  -9 1143.09   38.40
  -3   1   9 1203.88   41.60
   2  -1  -9  755.12   29.70
   2  -1  -9  747.03   32.60
  -2   1   9  762.72   31.60
   1  -1  -9  326.27   18.80
   1  -1  -9  322.97   20.50
  -1   1   9  323.17   19.70
   0  -1  -9  382.36   21.10
   0   1   9  386.96   25.80
  -1  -1  -9  578.74   27.50
   1   1   9  584.24   28.60
  -2  -1  -9   -2.10    4.00
   2   1   9   -5.20    1.70
  -3  -1  -9   27.50    7.70
   3   1   9   27.50    7.40
  -4  -1  -9  238.78   19.20
   4   1   9  244.38   18.20
   5   1   9   11.90    5.70
  -6  -1  -9   16.10    6.80
  -6  -1  -9    2.70    7.00
   6   1   9   41.50    8.30
   9  -2  -9   14.00    6.90
   9  -2  -9   -9.30    3.20
  -9   2   9    0.30    4.10
   8  -2  -9   -5.10    4.00
   8  -2  -9   -7.90    3.60
  -8   2   9    4.90    4.70
   7  -2  -9   32.30    7.80
   7  -2  -9   29.30    7.80
  -7   2   9   25.10    7.20
   6  -2  -9  249.78   17.80
   6  -2  -9  261.27   17.50
  -6   2   9  278.57   17.60
   5  -2  -9   17.50    6.40
   5  -2  -9   19.50    6.20
  -5   2   9    5.40    4.60
   4  -2  -9   38.80    7.70
   4  -2  -9   26.20    7.70
  -4   2   9   27.70    6.70
   3  -2  -9 1466.45   46.70
   3  -2  -9 1561.64   51.29
  -3   2   9 1428.66   48.30
   2  -2  -9    9.10    4.30
   1  -2  -9    1.30    4.30
  -1   2   9    2.10    4.40
   0  -2  -9   43.90    9.10
   0   2   9   53.99    9.60
  -1  -2  -9   48.80    9.80
   1   2   9   41.90    9.10
  -2  -2  -9   78.49   12.30
   2   2   9   81.99   12.60
  -3  -2  -9  118.39   13.00
   3   2   9   94.49   13.20
  -4  -2  -9  515.05   29.10
   4   2   9  487.55   27.20
  -5  -2  -9   15.20    8.50
   5   2   9   20.60    7.30
   9  -3  -9   -2.80    4.30
   9  -3  -9    4.30    6.00
  -9   3   9   -3.60    3.90
   8  -3  -9   21.80    7.10
   8  -3  -9   42.70    9.50
  -8   3   9   48.10    9.50
   7  -3  -9    3.40    3.50
  -7   3   9   -6.30    3.70
   6  -3  -9  329.47   20.50
   5  -3  -9  151.18   16.70
   5  -3  -9  133.09   13.20
  -5   3   9  117.89   17.20
   4  -3  -9    9.90    5.10
  -4   3   9    6.60    3.60
   3  -3  -9   18.20    6.40
  -3   3   9   17.80    5.80
   2  -3  -9    0.90    3.00
  -2   3   9    4.90    5.30
   1  -3  -9  219.78   16.30
  -1   3   9  219.88   17.40
   0  -3  -9  141.19   13.30
   0   3   9  138.79   13.90
  -1  -3  -9   36.10    8.30
   1   3   9   47.30   10.30
  -2  -3  -9   -5.50    2.60
   2   3   9   -2.10    2.60
  -3  -3  -9   70.59   12.20
   3   3   9   65.99   11.40
  -4  -3  -9  102.79   15.80
   4   3   9   88.09   13.20
  -5  -3  -9   63.29   13.30
   5   3   9   62.49   12.00
   8  -4  -9    2.50    5.80
   8  -4  -9   -6.00    4.40
  -8   4   9    9.00    5.60
   7  -4  -9   74.39   11.80
   7  -4  -9   88.09   12.50
  -7   4   9   77.39   12.70
  -7   4   9   88.09   11.90
   6  -4  -9    6.70    5.30
   6  -4  -9    7.20    4.70
  -6   4   9    4.30    4.50
   5  -4  -9   -6.20    3.70
  -5   4   9   -0.20    4.70
   4  -4  -9  308.27   20.00
  -4   4   9  303.27   20.20
   3  -4  -9   57.79   10.70
  -3   4   9   57.49   11.00
   2  -4  -9   56.09   10.00
  -2   4   9   50.89   10.20
   1  -4  -9   30.90    7.80
  -1   4   9   25.90    7.70
   0  -4  -9   -6.00    3.60
   0   4   9    3.40    4.00
  -1  -4  -9   -2.30    4.90
   1   4   9    8.30    5.60
  -2  -4  -9  306.57   21.40
   2   4   9  308.77   21.80
  -3  -4  -9   -6.20    2.70
   3   4   9    9.40    4.60
  -4  -4  -9   47.30   11.10
  -5  -4  -9  -13.50    4.90
   5   4   9    1.20    7.30
   8  -5  -9   -6.30    5.20
   8  -5  -9    2.50    4.50
  -8   5   9   -4.70    5.40
  -8   5   9   -5.80    4.90
   7  -5  -9  111.09   14.80
   6  -5  -9    1.10    3.70
   6  -5  -9   -6.20    2.70
  -6   5   9   -0.20    4.20
   5  -5  -9    1.90    4.10
  -5   5   9   11.00    5.50
   4  -5  -9   22.70    7.70
  -4   5   9   36.60    8.80
   3  -5  -9   33.50    8.70
  -3   5   9   41.70   10.10
   2  -5  -9  277.97   19.50
  -2   5   9  265.17   20.10
   1  -5  -9   21.10    7.70
  -1   5   9   15.80    6.70
   0  -5  -9   24.30    7.50
   0   5   9   22.50    8.20
  -1  -5  -9   43.80   10.00
   1   5   9   38.40   10.40
  -2  -5  -9   58.09   11.10
   2   5   9   51.69   10.90
  -3  -5  -9   29.40    9.80
   3   5   9   37.00   12.00
  -4  -5  -9   31.50    9.20
   4   5   9   43.70   10.20
   7  -6  -9    3.20    5.60
   7  -6  -9  -12.70    4.40
  -7   6   9    2.20    6.10
  -7   6   9    4.30    6.10
   6  -6  -9    3.20    5.80
  -6   6   9    5.50    4.90
   5  -6  -9   43.50   10.80
  -5   6   9   32.40    9.40
   4  -6  -9  138.19   14.70
  -4   6   9  167.18   16.40
   3  -6  -9   13.70    6.10
  -3   6   9    9.60    5.50
   2  -6  -9   -8.10    4.00
  -2   6   9    2.80    4.60
   1  -6  -9   23.70    7.10
  -1   6   9   22.70    8.10
   0  -6  -9   14.80    7.70
   0   6   9   13.50    6.40
  -1  -6  -9   39.10    9.80
   1   6   9   40.80   11.50
  -2  -6  -9   23.10    8.20
   2   6   9   25.00    9.00
  -3  -6  -9   11.70    6.70
   3   6   9   -8.90    4.90
  -6   7   9   97.49   14.50
   5  -7  -9  422.36   27.50
   4  -7  -9    2.50    6.30
  -4   7   9    0.70    5.40
   3  -7  -9  165.48   16.30
  -3   7   9  164.58   17.30
   2  -7  -9   19.20    8.30
  -2   7   9   21.30    9.10
   1  -7  -9   16.60    7.00
  -1   7   9   14.50    9.70
   0  -7  -9  152.78   16.80
   0   7   9  160.48   17.50
  -1  -7  -9  148.39   16.80
   1   7   9  138.99   19.20
  -2  -7  -9    6.40    7.50
   3  -8  -9    2.90    7.50
  -3   8   9    9.30    7.60
   2  -8  -9   81.09   13.90
  -2   8   9  108.69   16.10
   1  -8  -9    7.00    5.70
  -1   8   9    9.00    7.40
   5   8 -10   84.79   17.50
   4   8 -10   40.90   11.40
   3   8 -10    2.00    5.10
   2   8 -10   34.70    9.50
   1   8 -10  166.78   18.50
   1   8 -10  185.18   11.30
   0   8 -10    0.50    3.50
  -1   8 -10    9.00    7.60
  -1   8 -10   16.00    5.90
   6   7 -10   35.30   11.50
   5   7 -10   18.70    8.20
   3   7 -10   -0.50    6.40
   2   7 -10   17.60    7.70
   2   7 -10    7.60    2.90
   1   7 -10   16.80    7.10
   1   7 -10   18.20    4.70
  -1  -7  10   11.60    6.80
   0   7 -10  161.38   17.20
  -1   7 -10   31.10    8.50
  -2   7 -10  150.38   16.60
  -2   7 -10  187.48   14.80
  -3   7 -10    7.00    7.90
  -3   7 -10   35.10    9.20
   7   6 -10    9.50    8.10
   5   6 -10    3.20    6.00
   4   6 -10   56.39   12.10
   3   6 -10   -2.00    2.00
   3   6 -10   -0.20    1.70
   3   6 -10    2.90    5.50
   2   6 -10    1.60    3.10
   2   6 -10   -3.80    2.80
  -2  -6  10   -6.00    3.30
   1   6 -10  123.09   13.80
   1   6 -10  112.69    9.60
  -1  -6  10  125.49   10.90
   0   6 -10  195.08   13.10
   0   6 -10  209.08   17.90
  -1   6 -10   -5.90    2.90
  -1   6 -10    2.20    4.40
  -2   6 -10    4.10    4.80
  -3   6 -10   26.20    9.20
  -3   6 -10   26.30    7.40
   8   5 -10   35.60   10.70
   7   5 -10   40.10    9.80
   6   5 -10   97.29   14.90
   5   5 -10   31.40    8.10
   4   5 -10    8.10    2.20
   4   5 -10    5.30    6.50
   3   5 -10   23.80    4.30
   3   5 -10   19.50    7.60
   3   5 -10   12.30    3.50
  -3  -5  10   12.40    3.80
   2   5 -10   25.00    4.90
   2   5 -10   22.40    6.90
  -2  -5  10   19.30    5.10
   1   5 -10    1.90    3.10
   1   5 -10    4.20    4.80
  -1  -5  10   -0.60    4.00
   0   5 -10   11.40    4.10
   0   5 -10    7.90    5.00
  -1   5 -10  224.58   18.20
  -1   5 -10  219.38   15.90
  -2   5 -10  122.79   12.40
  -2   5 -10   90.79   13.30
  -3   5 -10    0.40    5.10
  -3   5 -10    1.90    4.90
  -4   5 -10  117.59   13.40
  -4   5 -10  141.59   15.30
   8   4 -10   46.20   11.20
   7   4 -10  175.58    6.90
   7   4 -10  188.38   17.70
   6   4 -10   77.39   13.00
   6   4 -10   92.29    5.60
   5   4 -10    7.90    5.90
   5   4 -10    4.20    2.20
   5   4 -10    6.80    2.80
   4   4 -10   85.29   13.40
   4   4 -10   94.89    7.10
   4   4 -10   99.99    7.60
   3   4 -10  183.08   10.70
   3   4 -10  219.28   13.50
   3   4 -10  202.58   16.90
  -3  -4  10  197.58   11.60
   2   4 -10  120.69   13.10
   2   4 -10  133.89   10.20
  -2  -4  10  128.59   11.60
   1   4 -10  157.88   15.80
   1   4 -10  180.48   12.60
  -1  -4  10  168.98   12.40
   0   4 -10    6.90    4.00
   0   4 -10    1.70    4.80
  -1   4 -10    8.20    5.60
  -1   4 -10   23.40    6.10
  -2   4 -10   21.00    6.50
  -2   4 -10   31.80    8.30
  -3   4 -10   55.09   10.30
  -3   4 -10   48.70   10.00
  -4   4 -10   23.60    7.70
  -4   4 -10   26.60    8.10
  -5   4 -10  -12.10    6.10
  -5   4 -10    7.20    5.80
   9   3 -10   97.09   14.70
   8   3 -10   -1.00    5.50
   7   3 -10  431.66   17.20
   7   3 -10  451.05   26.50
   6   3 -10    5.10    3.30
   6   3 -10    2.50    2.60
   6   3 -10    1.70    4.80
   5   3 -10   29.70    5.00
   5   3 -10   34.90    8.60
   4   3 -10   61.09   11.30
   4   3 -10   74.19    6.80
   4   3 -10   64.09    7.20
   3   3 -10    9.10    5.40
   3   3 -10    9.70    4.20
   2   3 -10   14.70    6.20
   2   3 -10    9.80    4.80
  -2  -3  10   10.30    4.70
   1   3 -10   -7.30    3.10
   1   3 -10   -0.50    3.00
   0   3 -10   -2.90    4.10
   0   3 -10    9.30    4.70
  -1   3 -10   75.29   12.20
  -2   3 -10   24.00    8.00
  -2   3 -10   42.30    9.20
  -3   3 -10   -4.50    3.60
  -3   3 -10   -3.10    3.10
  -4   3 -10   41.70    9.60
  -4   3 -10   37.20    9.30
  -5   3 -10  179.98   17.80
  -5   3 -10  146.59   15.40
   9   2 -10   23.10    5.60
   9   2 -10    8.00    7.00
   8   2 -10    2.70    3.20
   8   2 -10    7.60    6.20
   7   2 -10   18.70    4.60
   7   2 -10   17.10    4.60
   7   2 -10    7.00    5.20
   6   2 -10    3.50    3.30
   6   2 -10    1.50    3.30
   6   2 -10    1.00    3.60
   5   2 -10 1381.76   49.00
   5   2 -10 1275.77   37.40
   5   2 -10 1305.77   38.40
   4   2 -10   12.00    4.00
   4   2 -10   14.30    6.70
   4   2 -10    5.50    4.10
   3   2 -10  268.87   19.10
   3   2 -10  266.37   14.50
   3   2 -10  282.97   15.70
  -3  -2  10  249.97   14.90
   2   2 -10  264.97   15.60
   2   2 -10  268.97   19.60
   1   2 -10  115.29   11.00
   1   2 -10  122.09   12.90
   0   2 -10  163.18   13.50
   0   2 -10  173.68   15.80
  -1   2 -10   19.20    6.80
  -1   2 -10   10.80    5.00
  -2   2 -10  180.78   16.10
  -2   2 -10  186.18   15.80
  -3   2 -10   20.80    7.70
  -3   2 -10   24.50    7.80
  -4   2 -10   78.19   12.20
  -4   2 -10  109.49   15.30
  -5   2 -10   -3.00    3.10
  -5   2 -10    4.60    6.70
   9   1 -10    7.00    4.90
   9   1 -10   12.20    7.50
   8   1 -10   35.80    6.80
   8   1 -10   45.50    9.60
   7   1 -10   82.89   12.50
   7   1 -10   55.79    8.30
   6   1 -10  614.74   30.20
   6   1 -10  587.44   24.10
   5   1 -10  178.58   15.90
   5   1 -10  180.98   12.70
   4   1 -10    5.10    4.50
   4   1 -10    5.60    4.90
   3   1 -10  110.79   10.40
   3   1 -10  135.59   13.50
   2   1 -10    2.00    4.30
   2   1 -10   14.90    5.40
  -2  -1  10    7.00    4.30
   1   1 -10   30.30    7.90
   1   1 -10   35.60    7.80
  -1  -1  10   36.70    8.50
   0   1 -10   14.90    6.30
   0   1 -10   29.30    7.50
   0  -1  10   17.90    5.90
  -1   1 -10  133.19   13.50
  -1   1 -10  160.08   15.40
   1  -1  10  154.18   14.40
  -2   1 -10  343.47   22.40
  -2   1 -10  332.57   21.30
   2  -1  10  328.07   20.90
  -3   1 -10   15.90    6.50
  -3   1 -10    6.00    4.00
   3  -1  10    5.50    4.50
  -4   1 -10  353.46   23.90
  -4   1 -10  366.96   23.40
  -5   1 -10   12.40    7.10
  -5   1 -10    7.50    5.90
   5  -1  10    1.50    5.50
   9   0 -10   12.50    4.80
   9   0 -10   -1.20    4.10
   8   0 -10   59.29    9.70
   8   0 -10   44.20    9.70
   7   0 -10   50.99    9.80
   7   0 -10   67.19    9.80
   6   0 -10  402.16   23.80
   6   0 -10  437.76   21.20
   5   0 -10  116.99   15.40
   5   0 -10  125.39   11.00
   4   0 -10   17.80    5.90
   4   0 -10   22.90    7.20
  -4   0  10   20.80    6.80
   3   0 -10   -0.30    3.10
   3   0 -10    2.50    3.80
  -3   0  10   -1.30    3.50
   2   0 -10   78.99   10.80
   2   0 -10  106.89   14.20
  -2   0  10   69.09   11.40
   1   0 -10   46.10    9.20
   1   0 -10   51.19    9.10
  -1   0  10   42.00    8.70
   0   0 -10  139.19   14.50
   0   0 -10  142.09   12.90
   0   0  10  134.39   13.10
  -1   0 -10   54.39   10.70
  -1   0 -10   37.10    8.90
   1   0  10   48.30    9.80
  -2   0 -10   69.79   12.60
  -2   0 -10   81.89   12.80
   2   0  10   95.39   13.00
  -3   0 -10   28.30    8.70
  -3   0 -10   38.70    9.60
   3   0  10   27.00    8.00
  -4   0 -10  294.67   22.20
  -4   0 -10  248.28   20.10
   4   0  10  229.48   17.90
  -5   0 -10   25.00    8.20
  -5   0 -10    1.00    6.20
   5   0  10   21.20    7.00
   9  -1 -10   37.20    8.00
   9  -1 -10   44.00    8.90
  -9   1  10   37.70    9.30
   8  -1 -10    0.30    4.40
   8  -1 -10   -5.50    3.90
   7  -1 -10   53.69   10.30
   7  -1 -10   32.40    7.60
   6  -1 -10  263.37   19.00
   6  -1 -10  261.47   20.00
   5  -1 -10  177.68   15.90
   5  -1 -10  167.88   13.60
  -5   1  10  190.98   15.20
   4  -1 -10  273.37   17.30
   4  -1 -10  264.07   19.40
  -4   1  10  266.37   18.50
   3  -1 -10  167.18   13.40
   3  -1 -10  188.48   16.50
  -3   1  10  180.78   15.10
   2  -1 -10  120.59   13.70
   2  -1 -10  125.89   12.10
  -2   1  10  111.29   12.70
   1  -1 -10   31.20    8.60
   1  -1 -10   11.00    5.60
  -1   1  10   21.90    6.70
   0  -1 -10   -3.10    2.70
   0  -1 -10    6.90    5.20
   0   1  10    2.60    4.40
  -1  -1 -10  598.64   29.20
  -1  -1 -10  587.74   30.70
   1   1  10  616.14   30.30
  -2  -1 -10   79.29   12.80
   2   1  10   92.09   13.20
  -3  -1 -10   62.89   11.70
  -3  -1 -10   72.99   12.30
   3   1  10  111.19   14.50
  -4  -1 -10  271.67   26.50
  -4  -1 -10  355.96   24.10
   4   1  10  312.17   21.70
  -5  -1 -10   -4.30    5.90
  -5  -1 -10    5.40    6.10
   5   1  10    7.50    5.50
  -9   2  10   -1.90    5.30
   8  -2 -10   17.40    6.70
   8  -2 -10   -2.90    5.30
   7  -2 -10   -3.60    3.80
   7  -2 -10    0.20    3.40
   6  -2 -10   37.70    8.30
   6  -2 -10   23.60    7.60
  -6   2  10   28.80    7.70
   5  -2 -10   -5.40    3.50
   5  -2 -10    1.30    3.30
  -5   2  10   -0.30    4.70
   4  -2 -10   41.30    9.20
   4  -2 -10   48.60    9.10
  -4   2  10   45.20    9.10
   3  -2 -10   99.69   14.70
   3  -2 -10  107.79   11.70
  -3   2  10   98.89   13.50
   2  -2 -10   70.29   11.10
   2  -2 -10   51.49   10.20
  -2   2  10   63.39   11.40
   1  -2 -10   51.09    9.30
  -1   2  10   53.59   10.20
   0  -2 -10  166.78   15.30
   0   2  10  190.48   17.00
  -1  -2 -10  393.86   24.20
   1   2  10  422.56   25.10
  -2  -2 -10  230.38   19.00
   2   2  10  251.27   19.80
  -3  -2 -10   21.80    6.70
   3   2  10   22.30    7.50
  -4  -2 -10  205.28   19.30
   4   2  10  220.78   18.80
   5   2  10   10.80    6.30
   8  -3 -10    4.00    6.20
   8  -3 -10   -3.60    4.30
   7  -3 -10   22.80    7.50
   7  -3 -10   -1.20    6.80
  -7   3  10   18.20    6.50
   6  -3 -10  184.58   16.70
   6  -3 -10  190.88   16.50
  -6   3  10  196.08   16.60
   5  -3 -10  352.36   23.20
   5  -3 -10  421.46   23.70
  -5   3  10  398.86   23.20
   4  -3 -10   -4.20    3.70
   4  -3 -10    5.80    5.00
  -4   3  10    4.10    5.80
   3  -3 -10  408.66   23.30
  -3   3  10  368.56   23.10
   2  -3 -10    2.30    4.50
  -2   3  10    4.10    5.90
   1  -3 -10   -2.80    2.50
  -1   3  10   10.90    4.70
   0  -3 -10    0.20    4.70
   0   3  10    3.70    4.50
  -1  -3 -10  426.06   25.50
   1   3  10  427.56   26.40
  -2  -3 -10    8.30    5.70
   2   3  10    4.90    4.40
  -3  -3 -10    2.40    5.00
   3   3  10    5.90    5.80
  -4  -3 -10  145.69   15.90
   8  -4 -10   10.90    7.20
   8  -4 -10   -5.80    4.50
   7  -4 -10   17.20    7.00
   7  -4 -10    2.30    5.80
  -7   4  10    9.20    7.30
   6  -4 -10  348.77   22.80
   6  -4 -10  303.37   21.60
  -6   4  10  292.27   20.10
   5  -4 -10  167.58   15.40
   5  -4 -10  107.79   15.20
  -5   4  10  132.09   14.10
   4  -4 -10    8.10    5.30
  -4   4  10    3.30    4.40
   3  -4 -10   27.60    8.10
  -3   4  10   33.90    8.40
   2  -4 -10   75.39   12.20
  -2   4  10   50.49   11.00
   1  -4 -10   64.99   12.00
  -1   4  10   49.70   10.40
   0  -4 -10   27.90    7.80
   0   4  10   27.60    8.10
  -1  -4 -10   44.60   10.60
   1   4  10   75.29   13.70
  -2  -4 -10    5.10    5.80
   2   4  10   10.70    5.70
  -3  -4 -10   71.19   14.10
   3   4  10   61.29   13.30
   7  -5 -10   56.29   10.90
   7  -5 -10   68.09   13.20
  -7   5  10   48.30    9.40
   6  -5 -10  477.75   27.90
   6  -5 -10  426.16   27.50
  -6   5  10  466.35   26.50
   5  -5 -10   10.70    5.60
  -5   5  10    0.20    5.60
   4  -5 -10  186.68   16.90
  -4   5  10  171.08   17.00
   3  -5 -10   15.50    6.40
  -3   5  10   21.30    7.50
   2  -5 -10    7.70    4.70
  -2   5  10   -1.00    3.90
   1  -5 -10   -0.50    4.90
  -1   5  10    5.70    6.20
   0  -5 -10   -0.80    4.50
   0   5  10  -12.60    3.90
  -1  -5 -10   91.49   17.40
  -2  -5 -10   67.39   13.30
   2   5  10   42.10   10.40
  -3  -5 -10  156.68   17.10
   3   5  10  188.58   18.80
   6  -6 -10  254.77   21.90
   5  -6 -10    0.10    4.00
  -5   6  10    3.20    6.10
   4  -6 -10    1.50    4.50
  -4   6  10   -2.80    5.90
   3  -6 -10    0.90    5.50
  -3   6  10    2.00    6.00
   2  -6 -10  104.39   15.30
  -2   6  10  116.49   19.00
   1  -6 -10    8.70    6.70
  -1   6  10   10.00    6.90
   0  -6 -10    2.30    4.10
   0   6  10    2.50    5.10
  -1  -6 -10  110.19   16.70
   1   6  10   89.09   14.50
  -4   7  10   99.39   15.70
   3  -7 -10   -1.90    4.50
  -3   7  10   -1.90    5.30
   2  -7 -10  118.29   16.50
  -2   7  10  127.29   17.80
   1  -7 -10   -3.30    5.80
  -1   7  10    3.70    4.70
   5   7 -11   99.09   16.40
   4   7 -11   83.99   14.50
   3   7 -11   -0.30    6.30
   2   7 -11   33.60    9.00
   1   7 -11   24.60    5.60
   1   7 -11   23.80    9.40
   0   7 -11  307.87   24.50
   0   7 -11  333.57   18.20
  -1   7 -11   35.10   11.20
  -1   7 -11   45.90    8.50
   6   6 -11   55.69   12.20
   5   6 -11   12.30    8.20
   4   6 -11   25.90   10.70
   3   6 -11  -12.00    4.50
   3   6 -11    1.60    2.50
   2   6 -11   29.20    5.60
   2   6 -11   30.60    9.00
   1   6 -11  150.88   11.30
   1   6 -11  148.79   15.80
   0   6 -11   15.10    7.40
   0   6 -11   18.30    4.80
  -1   6 -11   51.09    9.30
  -1   6 -11   77.49   13.10
  -2   6 -11    0.70    5.80
  -2   6 -11   -2.20    4.60
   7   5 -11   59.09   12.30
   6   5 -11    3.10    7.70
   5   5 -11  -12.10    3.80
   5   5 -11    0.30    1.30
   4   5 -11    6.20    5.70
   4   5 -11    4.40    2.80
   3   5 -11    6.30    3.10
   3   5 -11    3.10    5.50
   3   5 -11   -0.30    2.90
  -3  -5  11   -2.70    3.60
   2   5 -11    7.30    6.10
   2   5 -11    7.80    4.00
  -2  -5  11    4.40    5.40
   1   5 -11    5.00    5.10
   1   5 -11    3.50    3.40
   0   5 -11   37.90    7.80
   0   5 -11   34.10    9.70
  -1   5 -11   -3.70    3.40
  -1   5 -11    1.90    5.40
  -2   5 -11   26.60    7.80
  -2   5 -11   11.00    7.30
  -3   5 -11    1.00    4.70
  -3   5 -11   -9.80    6.50
   8   4 -11   32.80    9.40
   7   4 -11   86.79   17.30
   6   4 -11   20.50    7.50
   6   4 -11   21.60    4.10
   5   4 -11   28.40    5.00
   5   4 -11   29.60    4.60
   5   4 -11   25.30    8.70
   4   4 -11   34.60    5.20
   4   4 -11   26.10    5.20
   4   4 -11   33.60    9.60
   3   4 -11  142.49   10.60
   3   4 -11  144.69   15.40
   3   4 -11  163.28   10.90
  -3  -4  11  140.99   11.40
   2   4 -11   -3.20    2.80
   2   4 -11    6.40    5.40
  -2  -4  11   -9.90    4.70
   1   4 -11   -4.60    3.20
   1   4 -11    3.50    5.10
   0   4 -11    6.20    5.90
   0   4 -11    9.20    6.00
  -1   4 -11   -0.60    4.30
  -1   4 -11   -4.70    3.30
  -2   4 -11   -1.80    5.40
  -2   4 -11   -0.30    4.70
  -3   4 -11   17.20    7.10
  -3   4 -11   15.00    7.00
   8   3 -11   76.39   13.30
   8   3 -11   73.79   12.40
   7   3 -11    3.90    3.50
   7   3 -11    9.50    6.10
   6   3 -11   -4.10    3.00
   6   3 -11   -0.40    4.90
   6   3 -11   -0.10    3.30
   5   3 -11   87.79    8.60
   5   3 -11   94.49   14.80
   4   3 -11    6.30    3.30
   4   3 -11   15.80    6.60
   4   3 -11    9.20    4.60
   3   3 -11   67.89   13.00
   3   3 -11   65.29    8.70
   3   3 -11   71.09    9.10
  -3  -3  11   68.89    9.00
   2   3 -11  143.69   12.00
   2   3 -11  184.58   17.30
   1   3 -11   73.99   12.90
   1   3 -11   73.49   10.30
   0   3 -11   87.99   11.90
   0   3 -11   91.49   14.00
  -1   3 -11    5.30    5.90
  -1   3 -11   -4.90    3.90
  -2   3 -11    3.90    4.60
  -2   3 -11   -5.10    4.90
  -3   3 -11   58.89   11.10
  -3   3 -11   45.50    9.80
  -4   3 -11  136.19   15.50
  -4   3 -11  163.98   17.50
   8   2 -11   -1.60    3.80
   8   2 -11    7.80    6.00
   7   2 -11  159.08   11.80
   7   2 -11  163.98   16.60
   6   2 -11   30.10    6.10
   6   2 -11   29.90    7.70
   6   2 -11   45.00    7.40
   5   2 -11  171.98   13.30
   5   2 -11  164.18   16.00
   5   2 -11  154.78   11.70
   4   2 -11   -0.20    3.30
   4   2 -11    2.60    5.40
   3   2 -11    2.50    3.30
   3   2 -11    3.70    4.10
   2   2 -11   27.40    6.80
   2   2 -11   19.70    6.50
   1   2 -11  142.39   15.20
   1   2 -11  168.38   13.70
   0   2 -11  158.38   14.00
   0   2 -11  186.98   17.30
  -1   2 -11   15.60    7.10
  -1   2 -11   44.00    8.90
  -2   2 -11  191.98   17.90
  -2   2 -11  213.98   17.50
  -3   2 -11   23.40    7.40
  -3   2 -11   20.10    7.00
  -4   2 -11  155.58   16.80
  -4   2 -11  133.89   15.30
   7   1 -11   16.80    5.90
   7   1 -11   28.60    8.50
   6   1 -11   89.19   11.10
   6   1 -11   82.99   13.30
   5   1 -11   -5.10    4.10
   5   1 -11   -4.30    3.60
   4   1 -11  593.84   31.00
   4   1 -11  574.44   24.90
   3   1 -11  205.48   18.20
   3   1 -11  237.98   15.80
   2   1 -11    3.90    4.70
   2   1 -11   -6.20    3.80
  -2  -1  11    3.60    5.20
   1   1 -11   40.30   10.20
   1   1 -11   35.00    7.20
  -1  -1  11   44.50    9.40
   0   1 -11   14.50    7.00
   0   1 -11   16.90    6.50
   0  -1  11   12.50    5.40
  -1   1 -11   14.70    6.10
  -1   1 -11   23.50    7.00
   1  -1  11    4.80    5.30
  -2   1 -11  205.48   17.40
  -2   1 -11  192.48   17.90
   2  -1  11  208.18   17.30
  -3   1 -11   46.50   10.70
  -3   1 -11   45.60   10.70
   3  -1  11   44.50    9.20
  -4   1 -11   78.49   13.60
  -4   1 -11   78.29   12.50
   4  -1  11   70.79   11.70
   8   0 -11   42.00    9.70
   8   0 -11   71.29   10.20
   7   0 -11   -6.80    2.80
   7   0 -11   -7.70    4.60
   6   0 -11   28.70    8.20
   5   0 -11  180.88   14.50
   5   0 -11  179.98   16.90
   4   0 -11    7.60    4.80
   4   0 -11    1.40    3.70
  -4   0  11   15.30    6.60
   3   0 -11   88.49   13.40
   3   0 -11   57.29   11.00
  -3   0  11   66.99   11.20
   2   0 -11    2.70    3.80
   2   0 -11    0.70    3.90
  -2   0  11   10.90    5.80
   1   0 -11   -2.10    4.00
   1   0 -11    3.80    5.40
  -1   0  11   -2.20    4.50
   0   0 -11    1.80    5.00
   0   0 -11   20.70    6.80
   0   0  11    1.40    5.10
  -1   0 -11   69.09   12.90
  -1   0 -11   59.19   10.80
   1   0  11   51.69   10.00
  -2   0 -11   47.50   10.70
  -2   0 -11   45.50   10.90
   2   0  11   33.10    8.00
  -3   0 -11   25.30    8.10
   3   0  11   21.50    8.10
  -4   0 -11    7.20    5.60
  -4   0 -11   -3.20    4.60
   4   0  11   -3.70    4.80
   8  -1 -11  147.89   14.20
   8  -1 -11  153.58   16.10
   7  -1 -11  190.08   15.30
   6  -1 -11    0.80    4.80
   6  -1 -11    6.60    5.50
   5  -1 -11   45.30    8.20
   5  -1 -11   55.19   11.10
  -5   1  11   59.49   11.10
   4  -1 -11   10.20    5.90
   4  -1 -11    5.80    5.30
  -4   1  11   -1.40    4.40
   3  -1 -11  367.66   21.50
   3  -1 -11  375.06   24.60
  -3   1  11  363.46   23.10
   2  -1 -11   11.70    5.70
   2  -1 -11   11.60    6.50
  -2   1  11   10.50    5.80
   1  -1 -11  109.19   15.40
   1  -1 -11  106.29   11.80
  -1   1  11  106.99   14.70
   0  -1 -11    1.20    5.60
   0  -1 -11   -7.60    2.60
   0   1  11    3.50    5.20
  -1  -1 -11  678.03   33.10
  -1  -1 -11  638.34   34.30
   1   1  11  783.22   35.50
  -2  -1 -11   34.80    9.60
  -2  -1 -11   39.90   10.40
   2   1  11   27.80    8.40
  -3  -1 -11   -2.20    5.00
  -3  -1 -11    4.10    5.70
   3   1  11   10.50    5.90
  -4  -1 -11   65.39   12.70
  -4  -1 -11   60.09   15.30
   4   1  11   93.39   16.80
   8  -2 -11    8.10    6.40
   8  -2 -11   22.40    7.60
   7  -2 -11   28.70    7.40
   7  -2 -11   18.30    6.70
   6  -2 -11   49.00    9.80
   6  -2 -11   48.60    9.30
  -6   2  11   38.00    9.60
   5  -2 -11   -1.00    4.50
   5  -2 -11   -8.10    4.40
  -5   2  11    2.50    4.90
   4  -2 -11   85.39   14.10
   4  -2 -11   77.49   11.90
  -4   2  11   86.79   13.30
   3  -2 -11   47.10    9.20
   3  -2 -11   58.29   11.70
  -3   2  11   70.39   12.50
   2  -2 -11   91.39   14.20
   2  -2 -11   80.79   12.20
  -2   2  11  119.49   16.20
   1  -2 -11   17.10    6.70
   1  -2 -11   15.40    7.40
  -1   2  11    9.80    4.70
   0  -2 -11   63.89   11.60
   0   2  11   59.39   11.50
  -1  -2 -11   25.10    7.40
   1   2  11   13.00    7.60
  -2  -2 -11   36.50   11.40
   2   2  11   37.50    9.20
  -3  -2 -11   98.29   15.40
   7  -3 -11    7.70    5.00
   7  -3 -11   -3.50    4.30
  -7   3  11   -0.40    5.00
   6  -3 -11   11.90    7.70
   6  -3 -11   26.50    7.50
  -6   3  11   24.40    8.20
   5  -3 -11   91.89   13.40
   5  -3 -11   74.19   13.60
  -5   3  11   70.59   12.60
   4  -3 -11   22.10    7.40
   4  -3 -11   21.00    7.30
  -4   3  11   48.50   10.10
   3  -3 -11   81.49   12.80
   3  -3 -11   68.49   13.20
  -3   3  11   73.69   12.20
   2  -3 -11   48.70   10.00
  -2   3  11   50.29   10.30
   1  -3 -11   -1.10    5.30
  -1   3  11   12.10    7.00
   0  -3 -11  243.78   19.80
   0   3  11  215.08   19.10
  -1  -3 -11   38.90    9.10
   1   3  11   34.70    9.20
  -2  -3 -11   57.09   11.30
   2   3  11   48.20   13.50
  -3  -3 -11   23.20    9.20
   3   3  11   17.80    7.10
   7  -4 -11   23.40    8.50
   7  -4 -11   21.20    7.70
  -7   4  11   13.00    7.90
   6  -4 -11    5.10    6.00
  -6   4  11    1.10    5.70
   5  -4 -11   44.50    9.70
   5  -4 -11   51.99   11.90
  -5   4  11   51.69   11.30
   4  -4 -11   23.10    8.10
  -4   4  11   21.00    7.50
   3  -4 -11    4.30    4.00
  -3   4  11    5.80    3.70
   2  -4 -11   -2.20    3.20
  -2   4  11   -0.60    5.20
   1  -4 -11   37.50    8.70
  -1   4  11   19.80    8.30
  -1  -4 -11  371.46   25.50
   1   4  11  342.07   25.60
  -2  -4 -11   32.80    9.70
   2   4  11   22.40    6.70
   6  -5 -11   22.20    8.90
   6  -5 -11   21.70    8.10
  -6   5  11   11.00    7.60
   5  -5 -11   -0.20    6.00
   5  -5 -11   -7.60    5.50
  -5   5  11   -1.30    6.10
   4  -5 -11    0.50    6.50
  -4   5  11    3.10    7.30
   3  -5 -11  108.99   16.00
   2  -5 -11   33.80    9.60
  -2   5  11   43.30   11.30
   1  -5 -11    9.70    6.10
  -1   5  11   20.80    8.70
   0  -5 -11  100.79   15.40
   0   5  11  106.59   17.00
  -1  -5 -11   24.10    7.50
   1   5  11   23.70    8.40
  -4   6  11   -1.60    6.70
   3  -6 -11   43.10   10.30
  -3   6  11   60.89   12.80
   2  -6 -11    1.10    6.20
  -2   6  11   -0.10    6.50
  -1   6  11   11.90    9.70
   4   6 -12   12.60    8.10
   3   6 -12   56.89   12.50
   2   6 -12   19.40    5.70
   2   6 -12   25.30    8.50
   1   6 -12  154.98   16.70
   1   6 -12  156.68   12.10
   0   6 -12  200.68   14.70
   0   6 -12  189.38   19.60
   6   5 -12   61.49   12.20
   5   5 -12   22.30    9.70
   4   5 -12    4.70    6.70
   3   5 -12   43.50   11.20
   3   5 -12   31.20    6.30
   2   5 -12   79.79   16.30
   2   5 -12   62.99    8.70
   1   5 -12   -7.90    3.00
   0   5 -12  367.06   30.70
  -1   5 -12   -1.50    4.90
  -1   5 -12   -5.70    5.10
   6   4 -12  130.49   17.70
   5   4 -12   -5.40    5.20
   5   4 -12   -3.00    3.50
   4   4 -12  125.29   10.20
   3   4 -12   42.40    7.30
   3   4 -12   77.69   13.20
   2   4 -12   51.69   12.10
   2   4 -12   47.00    8.10
   1   4 -12   19.40    7.90
   0   4 -12  122.09   12.10
   0   4 -12   98.19   15.10
  -1   4 -12   24.90    7.60
  -1   4 -12   34.50   10.20
  -2   4 -12   43.70   12.80
  -2   4 -12   52.99    9.90
   7   3 -12   21.70    5.80
   7   3 -12   16.00    7.00
   6   3 -12   -4.40    3.70
   5   3 -12   17.30    5.60
   5   3 -12   28.50    9.60
   4   3 -12  121.69   11.00
   4   3 -12  135.29   18.20
   3   3 -12  120.39   10.80
   3   3 -12  117.39   16.50
   2   3 -12   53.69   11.40
   2   3 -12   41.20    8.60
   1   3 -12    2.70    5.50
   1   3 -12    3.40    4.80
   0   3 -12   15.10    7.90
   0   3 -12    7.20    5.40
  -1   3 -12  -13.60    4.70
  -1   3 -12   16.00    6.00
  -2   3 -12    5.90    7.20
  -2   3 -12   18.50    7.10
   7   2 -12   47.00    7.80
   6   2 -12  293.07   16.60
   6   2 -12  274.97   21.90
   5   2 -12   38.20   10.30
   5   2 -12   45.10    8.20
   4   2 -12   -8.50    3.40
   4   2 -12   -4.00    4.60
   3   2 -12    7.10    4.70
   3   2 -12    8.40    6.20
   2   2 -12    6.80    6.20
   2   2 -12    9.90    5.50
   1   2 -12   67.39   13.10
   1   2 -12   64.79   10.90
   0   2 -12   19.10    7.20
   0   2 -12   40.60    9.30
  -1   2 -12    5.20    6.80
  -1   2 -12    5.50    5.60
  -2   2 -12   18.00    6.80
  -2   2 -12    0.10    6.00
  -3   2 -12   -6.50    5.40
   7   1 -12   73.39   13.60
   7   1 -12   52.39    9.90
   6   1 -12    0.70    4.60
   6   1 -12   14.00    6.80
   5   1 -12   54.59   10.60
   5   1 -12   79.69   13.20
   4   1 -12   -2.20    3.10
   3   1 -12   60.69    9.70
   3   1 -12   67.79   12.50
   2   1 -12    7.00    4.50
   2   1 -12   12.20    7.50
   1   1 -12    7.20    7.40
   1   1 -12   28.50    7.80
  -1  -1  12   14.50    7.20
   0   1 -12   24.40    7.30
   0   1 -12   13.30    6.50
   0  -1  12   11.80    5.90
  -1   1 -12  172.68   17.60
  -1   1 -12  150.68   15.50
   1  -1  12  136.39   15.50
  -2   1 -12   13.00    7.30
  -2   1 -12   26.50    8.70
   2  -1  12   28.90    8.90
  -3   1 -12   95.29   15.10
   3  -1  12   79.49   15.60
   7   0 -12   -1.40    4.40
   6   0 -12    7.10    4.90
   6   0 -12   -3.20    5.60
   5   0 -12   11.20    7.50
   5   0 -12    3.50    5.10
   4   0 -12  213.58   16.20
   4   0 -12  185.58   17.80
   3   0 -12  165.28   16.80
   3   0 -12  160.28   15.90
  -3   0  12  178.38   16.60
   2   0 -12   18.00    7.10
   2   0 -12   15.40    6.50
  -2   0  12   17.50    6.70
   1   0 -12  107.79   16.00
   1   0 -12   99.89   14.10
  -1   0  12   89.89   14.00
   0   0 -12   -0.80    6.20
   0   0 -12   -9.50    4.30
   0   0  12    1.80    5.80
  -1   0 -12    8.20    4.90
  -1   0 -12    5.30    5.60
   1   0  12   23.40    7.50
  -2   0 -12   45.40   10.70
  -3   0 -12   64.59   12.80
  -3   0 -12   68.89   13.90
   3   0  12   66.49   12.30
   7  -1 -12   24.00    8.30
   7  -1 -12   21.50    7.20
   6  -1 -12    0.70    4.40
   6  -1 -12    4.50    5.10
   5  -1 -12   86.89   12.40
   5  -1 -12   84.09   13.50
  -5   1  12  105.59   15.00
   4  -1 -12  315.37   20.40
   4  -1 -12  316.77   23.20
  -4   1  12  279.37   21.30
   3  -1 -12  272.77   19.20
   3  -1 -12  268.57   21.60
  -3   1  12  256.77   20.40
   2  -1 -12    5.20    6.20
   2  -1 -12    1.30    5.00
  -2   1  12    4.70    4.90
   1  -1 -12    6.80    6.00
   1  -1 -12    0.50    4.60
  -1   1  12    4.60    5.30
   0  -1 -12   46.00   10.20
   0  -1 -12   26.50    9.50
   0   1  12   42.50   10.40
  -1  -1 -12   47.20   13.40
  -2  -1 -12  190.68   18.20
  -2  -1 -12  220.68   21.40
   2   1  12  252.67   20.90
   7  -2 -12   -2.30    5.70
   7  -2 -12    1.20    5.30
   6  -2 -12   -1.60    5.90
   6  -2 -12   -8.70    4.20
  -6   2  12    2.50    5.60
   5  -2 -12    5.10    6.10
   5  -2 -12   -1.80    4.10
  -5   2  12   13.50    6.20
   4  -2 -12   89.79   14.60
   4  -2 -12   87.89   13.40
  -4   2  12  110.29   15.30
   3  -2 -12   16.10    7.00
   3  -2 -12   -6.40    5.90
  -3   2  12   20.90    8.10
   2  -2 -12   98.39   15.20
   2  -2 -12  119.69   13.40
  -2   2  12  120.59   17.40
   1  -2 -12    5.70    4.50
   1  -2 -12   -1.30    4.90
  -1   2  12    5.00    5.00
   0  -2 -12    2.80    9.50
   0  -2 -12   19.40    6.80
   0   2  12   18.40    6.20
  -1  -2 -12   10.50    7.40
  -1  -2 -12   12.20    7.20
   1   2  12    9.50    7.50
  -2  -2 -12  -14.10    4.90
  -2  -2 -12   -9.50    5.60
   2   2  12   -9.00    5.80
  -6   3  12   -7.20    5.90
   5  -3 -12   92.59   17.30
   5  -3 -12  127.59   14.20
  -5   3  12   98.39   17.70
   4  -3 -12   78.39   16.40
   4  -3 -12   90.89   13.80
   3  -3 -12    9.00    6.70
   2  -3 -12    2.90    5.60
   2  -3 -12    5.30    4.60
  -2   3  12   20.30    8.30
   1  -3 -12   69.09   15.00
  -1   3  12   97.19   14.90
   0  -3 -12   28.40    8.70
   0   3  12   53.09   11.30
  -1  -3 -12  335.17   24.90
   1   3  12  340.17   25.50
   5  -4 -12  120.59   16.70
   5  -4 -12  132.59   17.90
  -5   4  12  115.29   16.50
   4  -4 -12   -6.90    6.10
   4  -4 -12   -8.80    4.60
  -4   4  12    0.20    6.50
   3  -4 -12   80.29   13.60
  -3   4  12   70.49   12.50
   2  -4 -12   20.00    8.70
  -2   4  12   46.20   11.20
   1  -4 -12    6.50    7.20
  -1   4  12   -9.70    6.20
   0  -4 -12    0.80    5.90
   0   4  12   10.50    8.10
   3   5 -13   55.99    9.50
   2   5 -13   91.49   15.20
   2   5 -13   98.39   10.50
   5   4 -13    3.10    8.60
   5   4 -13   -7.80    3.40
   4   4 -13   -6.80    5.10
   4   4 -13   -4.30    3.40
   3   4 -13    7.40    7.10
   3   4 -13    1.10    4.00
   2   4 -13   24.20    6.50
   2   4 -13   18.50    9.50
   1   4 -13   -6.70    3.80
   0   4 -13   51.99   10.90
   0   4 -13   54.09   12.70
   5   3 -13  185.08   13.00
   5   3 -13  207.88   19.80
   4   3 -13   75.39   14.60
   4   3 -13   59.39    9.40
   3   3 -13   11.00    6.30
   3   3 -13   14.20    7.30
   2   3 -13   45.60    8.40
   2   3 -13   28.90    9.70
   1   3 -13   16.50    6.70
   1   3 -13   26.90    9.20
   0   3 -13   17.00    7.80
   0   3 -13   33.40    8.30
   6   2 -13  374.86   27.30
   6   2 -13  391.96   20.70
   5   2 -13   31.40    9.90
   4   2 -13  -13.60    5.00
   3   2 -13   20.60    7.20
   3   2 -13    9.90    8.00
   2   2 -13   20.50    6.80
   2   2 -13   14.40    7.20
   1   2 -13   -2.70    4.50
   1   2 -13    3.40    5.30
   0   2 -13    9.60    7.70
   0   2 -13    0.70    6.30
  -1   2 -13  914.81   43.70
   6   1 -13   45.70   12.00
   6   1 -13   46.30    9.50
   5   1 -13    5.20    4.90
   5   1 -13   16.40    6.80
   4   1 -13   41.90    9.90
   4   1 -13   29.90    7.30
   3   1 -13   10.50    7.60
   3   1 -13    4.00    5.20
   2   1 -13  159.48   17.80
   2   1 -13  164.88   15.00
   1   1 -13    5.70    5.90
   1   1 -13   -9.30    3.90
   0   1 -13   -8.50    4.10
   0   1 -13   -5.40    4.30
   0  -1  13    3.80    5.20
  -1   1 -13   16.60    8.50
  -1   1 -13   32.40   10.10
   1  -1  13   35.40   10.90
   6   0 -13    1.00    5.90
   6   0 -13   18.80    6.60
   5   0 -13   -1.60    5.80
   5   0 -13   -0.50    4.70
   4   0 -13    2.10    5.70
   4   0 -13    1.10    3.80
   3   0 -13   25.30    7.70
   3   0 -13   25.70    8.70
  -3   0  13   49.99   12.40
   2   0 -13  163.98   18.20
   2   0 -13  140.69   14.80
  -2   0  13  143.69   15.30
   1   0 -13    5.90    6.30
   1   0 -13   -0.90    5.40
  -1   0  13    4.90    6.50
   0   0 -13  158.48   18.00
   0   0  13  180.98   18.20
  -1   0 -13   33.00    9.90
  -1   0 -13   37.10    9.70
   1   0  13   29.20    9.20
   6  -1 -13   36.50    9.20
   6  -1 -13   35.30   10.10
   5  -1 -13    7.60    7.90
   5  -1 -13    1.30    4.80
   4  -1 -13   26.60    7.80
   4  -1 -13   19.60    8.60
  -4   1  13   20.90    7.10
   3  -1 -13    2.00    6.20
   3  -1 -13    1.00    5.40
  -3   1  13   -0.40    4.40
   2  -1 -13   99.09   15.70
   2  -1 -13  135.19   14.70
  -2   1  13  134.89   18.50
   1  -1 -13   16.60    8.80
  -1   1  13   29.30    9.20
   0  -1 -13  172.38   17.60
   0  -1 -13  163.48   17.70
   0   1  13  177.28   18.80
   5  -2 -13  118.69   18.90
  -5   2  13  104.39   15.60
   4  -2 -13  -11.50    5.90
   4  -2 -13   -5.40    5.00
  -4   2  13   -6.70    5.40
   3  -2 -13  -13.00    4.50
  -3   2  13   -5.70    4.90
   2  -2 -13    7.10    8.20
   2  -2 -13    7.10    5.80
  -2   2  13   -5.10    6.40
   1  -2 -13   14.80    8.50
   1  -2 -13    7.80    7.90
  -1   2  13   14.10    6.40
   0  -2 -13   -0.80    4.70
   3  -3 -13   68.99   12.60
   3  -3 -13   59.09   14.70
  -3   3  13   32.80    9.10
   2  -3 -13    6.60    7.20
   0   0   0    0.00    0.00

_computing_structure_solution     'SHELXT 2014/5 (Sheldrick, 2014)'
;
_shelx_hkl_checksum   61292
